# Supplementary material for: Effects of income and residential area on survival of patients with head and neck cancers following radiotherapy: working age individuals in Taiwan
Source: PeerJ. 2018 Sep 17;6:e5591. doi: 10.7717/peerj.5591 (PMC6147123; doi:10.7717/peerj.5591)
Supplement: Data S2 [file peerj-06-5591-s002.xlsx]

## Sheet: Sheet1
index_date(Fist day of head and neck radiotherapy)	index_year	Birthday	Gender	Age	residential area	income level	ICD9	tumor original (1:oral cancer. 0:non-oral cancer)	DEATH	DEATHDATE	bservation end day(2013/12/31)if case die before 2013/12/31, the observatiob end if the date of death	fy(the period from index date to observation end date )(years)	Depression diagnosis between index date to obseration end date (0:no depression ,1: yes)	after index day, the depression diagnosis date	Chemotherapy(6 months around index date, case receiving chemotherpay or not (0=no、1=yes))	cerebrovascular acciden(before index date, cerebrovascular accident history or not) (0:no、1:yes)	immune disease(before index date,immune disease history or not) (0:no、1:yes)	Dementia(before index date,Dementia history or not (0:no、1:yes))	Parkison(before index date,Parkison disease history or not) (0:no、1:yes)	DM(before index date,diabetes mellitus history or not) (0:no、1:yes)	HTN(before index date,hypertension history or not )(0:no、1:yes)	Hyperlipidemiad(before index date,hyperlipidemia history or not )(0:no、1:yes))	CAD(before index date,coronary artery disease history or not) (0:no、1:yes)	Depression	Dialysis(before index date,on dialysis history or not) (0:no、1:yes)	Head and neck excisional tumor surgery(3 months around index day, case receiving head and neck excisional tumor surgery or not )(0=no、1=yes)	Dead_fy(if case is dead, the period from index day to the date of death (years))
2007-06-13	2007	1942-06-15	1	64.99	3	2	1481	0	1	2008-09-12	2008-09-12	1.25	0	#NULL!	1	0	0	0	0	0	0	0	0	0	0	0	1
2009-11-10	2009	1944-11-15	1	64.99	3	1	1450	1	1	2010-07-09	2010-07-09	0.66	0	#NULL!	1	0	0	0	0	0	0	0	0	0	0	0	1
2008-03-11	2008	1943-03-15	1	64.99	2	3	1450	1	0	#NULL!	2013-12-31	5.81	0	#NULL!	0	0	0	0	0	0	1	0	1	0	0	0	#NULL!
2004-12-09	2004	1939-12-15	1	64.99	1	3	1459	1	1	2008-01-21	2008-01-21	3.12	0	#NULL!	1	1	0	0	0	1	1	0	0	0	0	0	3
2003-12-12	2003	1938-12-15	1	64.99	1	2	1460	0	1	2007-12-12	2007-12-12	4	0	#NULL!	1	0	0	0	0	0	0	0	0	0	0	0	4
2011-04-08	2011	1946-04-15	0	64.98	4	2	1479	0	1	2012-09-13	2012-09-13	1.43	0	#NULL!	1	0	0	0	0	0	1	1	0	0	0	0	1
2007-08-09	2007	1942-08-15	1	64.98	3	1	1489	0	0	#NULL!	2013-12-31	6.4	0	#NULL!	1	0	0	0	0	0	1	0	0	0	0	0	#NULL!
2012-05-07	2012	1947-05-15	1	64.98	3	1	1450	1	1	2012-11-24	2012-11-24	0.55	0	#NULL!	1	0	0	0	0	1	1	0	0	0	0	1	1
2007-10-08	2007	1942-10-15	1	64.98	2	1	1460	0	1	2008-05-17	2008-05-17	0.61	0	#NULL!	1	0	0	0	0	0	1	1	0	0	0	0	1
2007-09-06	2007	1942-09-15	0	64.97	3	2	1479	0	1	2011-06-07	2011-06-07	3.75	1	2009-09-25	1	0	0	0	0	0	1	1	0	0	0	0	4
2007-12-05	2007	1942-12-15	1	64.97	3	2	1450	1	1	2008-06-23	2008-06-23	0.55	0	#NULL!	1	0	0	0	0	0	1	0	0	0	0	0	1
2004-03-04	2004	1939-03-15	1	64.97	2	2	1469	0	1	2010-01-13	2010-01-13	5.86	0	#NULL!	0	1	1	0	0	0	1	0	1	0	0	0	6
2010-10-04	2010	1945-10-15	1	64.97	1	1	1410	1	0	#NULL!	2013-12-31	3.24	0	#NULL!	1	1	0	0	0	0	1	0	0	0	0	0	#NULL!
2010-07-05	2010	1945-07-15	1	64.97	1	1	1489	0	1	2012-01-08	2012-01-08	1.51	0	#NULL!	1	0	0	0	0	0	0	0	0	0	0	0	2
2000-07-03	2000	1935-07-15	1	64.97	1	1	141	1	1	2004-11-02	2004-11-02	4.33	0	#NULL!	0	0	0	0	0	0	0	0	0	0	0	0	4
2004-12-02	2004	1939-12-15	1	64.97	1	2	1479	0	1	2005-09-11	2005-09-11	0.77	0	#NULL!	1	1	0	0	0	1	0	0	0	0	0	0	1
2011-05-05	2011	1946-05-15	0	64.97	1	2	1470	0	0	#NULL!	2013-12-31	2.66	1	2012-06-22	0	0	0	0	0	0	0	0	0	0	0	0	#NULL!
2004-12-29	2004	1940-01-15	1	64.96	3	1	1489	0	1	2005-08-07	2005-08-07	0.61	0	#NULL!	1	0	0	0	0	0	0	0	0	0	0	0	1
2007-01-01	2007	1942-01-15	0	64.96	3	1	1420	1	0	#NULL!	2013-12-31	7	0	#NULL!	1	1	0	0	0	0	1	0	1	1	0	0	#NULL!
2002-11-02	2002	1937-11-15	0	64.96	3	2	1448	1	1	2006-08-15	2006-08-15	3.78	0	#NULL!	0	0	0	0	0	0	0	0	0	0	0	0	4
2012-06-01	2012	1947-06-15	1	64.96	3	3	1619	0	0	#NULL!	2013-12-31	1.58	0	#NULL!	1	0	0	0	0	1	1	1	1	0	0	0	#NULL!
2001-10-02	2001	1936-10-15	1	64.96	2	3	149	0	0	#NULL!	2013-12-31	12.25	0	#NULL!	1	0	0	0	0	0	0	0	0	0	0	0	#NULL!
2003-10-02	2003	1938-10-15	1	64.96	1	1	161	0	1	2006-01-31	2006-01-31	2.33	0	#NULL!	0	0	0	0	0	0	0	0	0	0	0	0	2
2006-02-02	2006	1941-02-15	1	64.96	1	2	1489	0	1	2006-09-14	2006-09-14	0.61	0	#NULL!	1	1	0	0	0	0	1	0	1	0	0	0	1
2004-07-26	2004	1939-08-15	1	64.95	3	1	1610	0	1	2013-09-06	2013-09-06	9.11	1	2012-01-19	1	0	0	0	0	0	1	0	1	0	0	0	9
2007-06-27	2007	1942-07-15	1	64.95	2	2	1479	0	0	#NULL!	2013-12-31	6.51	0	#NULL!	1	0	0	0	0	1	1	0	0	0	0	0	#NULL!
2008-01-29	2008	1943-02-15	1	64.95	2	2	1483	0	1	2008-06-17	2008-06-17	0.38	0	#NULL!	1	0	0	0	0	0	0	0	0	0	0	0	0
2003-12-29	2003	1939-01-15	1	64.95	1	3	1479	0	1	2012-10-24	2012-10-24	8.82	0	#NULL!	1	0	0	0	0	1	1	0	1	0	0	0	9
2012-11-26	2012	1947-12-15	1	64.95	1	1	1489	0	0	#NULL!	2013-12-31	1.1	0	#NULL!	1	0	0	0	0	0	1	0	0	0	0	0	#NULL!
2010-04-22	2010	1945-05-15	1	64.94	4	1	1412	1	1	2011-04-23	2011-04-23	1	0	#NULL!	1	0	0	0	0	0	0	0	0	0	0	0	1
2009-09-25	2009	1944-10-15	1	64.94	3	1	1479	0	0	#NULL!	2013-12-31	4.27	0	#NULL!	1	0	0	0	0	0	1	0	0	0	0	0	#NULL!
2009-09-24	2009	1944-10-15	1	64.94	3	1	1619	0	0	#NULL!	2013-12-31	4.27	0	#NULL!	1	0	0	0	0	1	1	1	0	0	0	0	#NULL!
2001-09-24	2001	1936-10-15	1	64.94	2	1	1479	0	1	2007-05-29	2007-05-29	5.68	0	#NULL!	1	0	0	0	0	0	1	0	1	0	0	0	6
2007-07-24	2007	1942-08-15	1	64.94	2	1	1456	1	1	2008-05-21	2008-05-21	0.83	0	#NULL!	1	0	0	0	0	0	1	0	0	0	0	0	1
2005-10-24	2005	1940-11-15	0	64.94	2	2	1460	0	0	#NULL!	2013-12-10	8.13	0	#NULL!	1	0	0	0	0	0	1	0	1	0	0	0	#NULL!
2007-01-23	2007	1942-02-15	1	64.94	1	3	1431	1	0	#NULL!	2013-12-31	6.94	0	#NULL!	1	0	0	0	0	0	1	0	0	0	0	0	#NULL!
2006-07-25	2006	1941-08-15	1	64.94	1	3	1479	0	1	2008-03-17	2008-03-17	1.65	0	#NULL!	1	0	0	0	0	0	0	0	0	0	0	0	2
2012-09-24	2012	1947-10-15	1	64.94	1	3	1619	0	0	#NULL!	2013-12-31	1.27	0	#NULL!	0	0	0	0	0	0	1	1	1	0	0	0	#NULL!
2003-03-19	2003	1938-04-15	1	64.93	3	1	1419	1	1	2008-02-12	2008-02-12	4.9	0	#NULL!	0	0	0	0	0	1	1	1	0	0	0	0	5
2012-07-19	2012	1947-08-15	1	64.93	3	3	1456	1	1	2012-09-06	2012-09-06	0.13	0	#NULL!	0	1	0	1	0	0	1	0	1	0	0	0	0
2012-07-20	2012	1947-08-15	1	64.93	1	3	1460	0	1	2013-09-23	2013-09-23	1.18	0	#NULL!	1	0	0	0	0	0	0	0	0	0	0	0	1
2009-03-16	2009	1944-04-15	1	64.92	3	2	1479	0	1	2011-03-09	2011-03-09	1.98	0	#NULL!	1	0	0	0	0	0	0	0	0	0	0	0	2
2011-09-16	2011	1946-10-15	1	64.92	2	2	1619	0	0	#NULL!	2013-12-31	2.29	0	#NULL!	0	0	0	0	0	0	1	1	1	0	0	0	#NULL!
2002-11-12	2002	1937-12-15	1	64.91	4	2	1450	1	0	#NULL!	2013-11-07	10.99	0	#NULL!	0	0	0	0	0	0	1	0	1	0	0	0	#NULL!
2011-10-13	2011	1946-11-15	1	64.91	3	2	1489	0	1	2012-09-14	2012-09-14	0.92	0	#NULL!	0	0	0	0	0	0	0	1	1	0	0	0	1
2004-02-12	2004	1939-03-15	1	64.91	3	2	1479	0	1	2007-02-27	2007-02-27	3.04	0	#NULL!	1	0	0	0	0	1	0	0	0	0	0	0	3
2009-07-14	2009	1944-08-15	1	64.91	3	1	1419	1	0	#NULL!	2013-12-31	4.47	0	#NULL!	1	0	0	0	0	0	1	0	0	0	0	0	#NULL!
2012-09-10	2012	1947-10-15	1	64.91	3	3	1410	1	0	#NULL!	2013-12-30	1.3	0	#NULL!	1	0	0	0	0	1	1	0	0	0	0	0	#NULL!
2011-06-13	2011	1946-07-15	1	64.91	1	2	1421	1	0	#NULL!	2013-12-31	2.55	0	#NULL!	1	0	0	0	0	0	1	0	0	0	0	0	#NULL!
2002-08-12	2002	1937-09-15	1	64.91	1	2	1453	1	1	2003-01-06	2003-01-06	0.4	0	#NULL!	1	0	0	0	0	0	1	0	0	0	0	0	0
2006-08-11	2006	1941-09-15	1	64.9	4	2	1455	1	1	2013-09-16	2013-09-16	7.1	0	#NULL!	0	0	0	0	0	0	0	0	1	0	0	0	7
2008-10-07	2008	1943-11-15	1	64.9	3	2	1450	1	1	2012-04-10	2012-04-10	3.51	0	#NULL!	1	0	0	0	0	1	1	0	1	0	0	0	4
2013-02-05	2013	1948-03-15	1	64.9	3	1	1619	0	0	#NULL!	2013-12-31	0.9	0	#NULL!	1	0	0	0	0	0	1	0	0	0	0	0	#NULL!
2009-09-08	2009	1944-10-15	1	64.9	3	2	1469	0	0	#NULL!	2013-12-31	4.31	0	#NULL!	0	1	0	0	0	0	0	0	0	0	0	0	#NULL!
2002-09-09	2002	1937-10-15	1	64.9	2	2	144	1	1	2004-12-03	2004-12-03	2.23	0	#NULL!	0	0	0	0	0	0	0	0	0	0	0	0	2
2010-10-11	2010	1945-11-15	0	64.9	1	1	1456	1	0	#NULL!	2013-12-31	3.22	0	#NULL!	0	0	0	0	0	0	0	0	0	0	0	0	#NULL!
2012-04-09	2012	1947-05-15	1	64.9	1	2	1456	1	0	#NULL!	2013-12-31	1.73	0	#NULL!	1	0	0	0	0	0	0	0	0	0	0	0	#NULL!
2005-11-07	2005	1940-12-15	1	64.9	1	3	1450	1	0	#NULL!	2013-12-31	8.15	0	#NULL!	0	0	0	0	0	0	0	0	0	0	0	0	#NULL!
2008-04-07	2008	1943-05-15	1	64.9	1	1	1455	1	0	#NULL!	2013-12-31	5.73	0	#NULL!	1	0	0	0	0	0	0	0	0	0	0	0	#NULL!
2010-04-07	2010	1945-05-15	1	64.9	1	3	146	0	1	2010-07-25	2010-07-25	0.3	0	#NULL!	1	0	0	0	0	1	1	1	0	0	0	0	0
2007-11-06	2007	1942-12-15	1	64.89	3	2	1479	0	1	2008-11-14	2008-11-14	1.02	0	#NULL!	1	0	0	0	0	0	0	0	0	0	0	0	1
2006-02-02	2006	1941-03-15	1	64.89	3	3	1479	0	0	#NULL!	2013-12-31	7.91	0	#NULL!	1	0	0	0	0	0	0	0	0	0	0	0	#NULL!
2012-12-05	2012	1948-01-15	1	64.89	3	2	1469	0	0	#NULL!	2013-12-31	1.07	0	#NULL!	1	0	0	0	0	1	0	1	0	0	0	0	#NULL!
2004-12-06	2004	1940-01-15	1	64.89	3	2	1479	0	1	2005-08-31	2005-08-31	0.73	0	#NULL!	1	0	0	0	0	0	1	0	0	0	0	0	1
2008-12-04	2008	1944-01-15	1	64.89	3	2	1450	1	1	2011-01-04	2011-01-04	2.08	0	#NULL!	1	0	0	0	0	0	0	0	0	0	0	0	2
2010-01-05	2010	1945-02-15	1	64.89	3	3	1479	0	0	#NULL!	2013-12-31	3.99	0	#NULL!	1	0	0	0	0	0	0	0	0	0	0	0	#NULL!
2012-09-03	2012	1947-10-15	1	64.89	3	3	1450	1	0	#NULL!	2013-11-14	1.2	0	#NULL!	0	0	0	0	0	0	0	0	0	0	0	1	#NULL!
2012-12-04	2012	1948-01-15	1	64.89	2	2	1479	0	0	#NULL!	2013-12-31	1.07	0	#NULL!	1	0	0	0	0	0	0	0	0	0	0	0	#NULL!
2010-07-07	2010	1945-08-15	1	64.89	2	2	1479	0	0	#NULL!	2013-12-31	3.49	0	#NULL!	1	0	0	0	0	0	0	0	0	0	0	0	#NULL!
2010-02-02	2010	1945-03-15	1	64.89	2	1	1483	0	0	#NULL!	2013-12-31	3.91	0	#NULL!	0	0	0	0	0	1	1	1	1	0	0	0	#NULL!
2001-08-07	2001	1936-09-15	1	64.89	1	1	1479	0	1	2004-10-02	2004-10-02	3.15	0	#NULL!	0	0	0	0	0	0	1	0	0	0	0	0	3
2010-02-04	2010	1945-03-15	1	64.89	1	2	1459	1	1	2010-11-18	2010-11-18	0.79	0	#NULL!	1	0	0	0	0	0	0	0	0	0	0	0	1
2000-09-04	2000	1935-10-15	1	64.89	1	1	146	0	1	2008-06-19	2008-06-19	7.79	1	2001-02-17	1	0	0	0	0	1	0	0	0	0	0	0	8
2010-11-03	2010	1945-12-15	1	64.88	4	2	1479	0	1	2013-07-09	2013-07-09	2.68	0	#NULL!	1	0	0	0	0	0	1	0	1	0	0	0	3
2006-09-01	2006	1941-10-15	1	64.88	3	2	1479	0	1	2010-04-16	2010-04-16	3.62	0	#NULL!	0	0	0	0	0	0	0	0	0	0	0	0	4
2000-06-01	2000	1935-07-15	1	64.88	3	1	1479	0	1	2002-01-11	2002-01-11	1.61	0	#NULL!	0	1	0	0	0	0	0	0	0	1	0	0	2
2013-07-03	2013	1948-08-15	1	64.88	3	3	1419	1	0	#NULL!	2013-12-31	0.5	0	#NULL!	0	0	0	0	0	0	0	0	0	0	0	0	#NULL!
2009-06-02	2009	1944-07-15	0	64.88	3	3	1479	0	0	#NULL!	2013-12-31	4.58	0	#NULL!	0	0	0	0	0	0	0	0	0	0	0	0	#NULL!
2012-04-02	2012	1947-05-15	1	64.88	3	1	1450	1	0	#NULL!	2013-12-31	1.75	0	#NULL!	1	0	0	0	0	0	0	0	0	0	0	0	#NULL!
2009-12-01	2009	1945-01-15	1	64.88	3	1	1619	0	1	2013-11-05	2013-11-05	3.93	0	#NULL!	1	0	0	0	0	0	0	0	0	0	0	0	4
2009-06-01	2009	1944-07-15	1	64.88	2	2	1482	0	1	2009-07-31	2009-07-31	0.16	0	#NULL!	1	0	0	0	1	0	1	0	0	0	0	0	0
2012-12-31	2012	1948-02-15	1	64.88	1	2	1412	1	0	#NULL!	2013-12-31	1	0	#NULL!	0	1	0	0	0	1	1	0	0	0	0	0	#NULL!
2003-05-27	2003	1938-07-15	0	64.87	4	2	1450	1	1	2004-01-28	2004-01-28	0.67	0	#NULL!	1	0	0	0	0	0	0	0	0	0	0	0	1
2010-09-27	2010	1945-11-15	1	64.87	3	1	1419	1	0	#NULL!	2013-12-31	3.26	0	#NULL!	1	0	0	0	0	0	1	1	0	0	0	0	#NULL!
2005-08-29	2005	1940-10-15	0	64.87	3	3	1479	0	1	2008-06-23	2008-06-23	2.82	0	#NULL!	1	0	0	0	0	0	0	0	0	0	0	0	3
2003-01-27	2003	1938-03-15	1	64.87	2	3	1479	0	1	2006-12-31	2006-12-31	3.93	0	#NULL!	0	1	0	0	0	0	1	0	1	0	0	0	4
2003-07-28	2003	1938-09-15	0	64.87	2	3	1479	0	0	#NULL!	2013-12-31	10.43	1	2003-09-16	1	0	0	0	0	0	0	0	0	0	0	0	#NULL!
2013-03-28	2013	1948-05-15	1	64.87	2	2	1450	1	0	#NULL!	2013-12-31	0.76	0	#NULL!	1	0	0	0	0	1	1	1	1	0	0	0	#NULL!
2008-07-29	2008	1943-09-15	1	64.87	2	2	1431	1	0	#NULL!	2013-12-31	5.42	0	#NULL!	1	0	0	0	0	0	1	0	1	0	0	0	#NULL!
2001-11-27	2001	1937-01-15	1	64.87	2	2	1619	0	1	2006-10-24	2006-10-24	4.91	0	#NULL!	0	0	0	0	0	0	0	0	0	0	0	0	5
2002-10-27	2002	1937-12-15	1	64.87	1	2	1489	0	1	2009-05-02	2009-05-02	6.51	0	#NULL!	1	0	0	0	0	0	0	0	0	0	0	0	7
2007-05-24	2007	1942-07-15	1	64.86	3	2	1618	0	0	#NULL!	2013-12-31	6.61	0	#NULL!	0	0	0	0	0	1	0	0	0	0	0	0	#NULL!
2000-05-24	2000	1935-07-15	1	64.86	3	2	1419	1	1	2000-11-14	2000-11-14	0.48	0	#NULL!	1	0	0	0	0	0	0	0	0	0	0	0	0
2006-07-27	2006	1941-09-15	1	64.86	2	2	1489	0	0	#NULL!	2013-12-31	7.43	0	#NULL!	1	1	0	0	0	0	0	0	0	0	0	0	#NULL!
2008-08-25	2008	1943-10-15	1	64.86	2	2	1479	0	1	2009-09-23	2009-09-23	1.08	0	#NULL!	1	0	0	0	0	0	0	0	0	0	0	0	1
2012-07-24	2012	1947-09-15	1	64.86	1	1	1453	1	0	#NULL!	2013-12-31	1.44	0	#NULL!	1	0	0	0	0	0	0	0	0	0	0	0	#NULL!
2005-04-26	2005	1940-06-15	1	64.86	1	1	1479	0	1	2006-01-10	2006-01-10	0.71	0	#NULL!	1	0	0	0	0	1	1	1	0	0	0	0	1
2012-10-23	2012	1947-12-15	0	64.86	1	2	1610	0	0	#NULL!	2013-12-31	1.19	0	#NULL!	0	0	0	0	0	0	1	0	0	0	0	0	#NULL!
2011-11-23	2011	1947-01-15	1	64.85	3	2	1450	1	1	2012-10-17	2012-10-17	0.9	0	#NULL!	1	0	0	0	0	0	1	0	0	0	0	0	1
2012-11-20	2012	1948-01-15	1	64.85	3	1	1431	1	0	#NULL!	2013-12-31	1.11	0	#NULL!	0	0	0	0	0	0	0	0	0	0	0	0	#NULL!
2012-10-22	2012	1947-12-15	1	64.85	2	2	1450	1	0	#NULL!	2013-12-31	1.19	0	#NULL!	0	1	0	0	0	1	0	1	1	0	0	1	#NULL!
2001-06-21	2001	1936-08-15	1	64.85	2	2	1470	0	1	2003-11-30	2003-11-30	2.44	0	#NULL!	0	0	0	0	0	0	0	0	0	0	0	0	2
2012-03-19	2012	1947-05-15	0	64.85	2	2	1439	1	1	2012-10-28	2012-10-28	0.61	0	#NULL!	0	0	0	0	0	1	1	1	1	0	0	1	1
2012-04-19	2012	1947-06-15	1	64.85	2	2	1489	0	1	2013-12-17	2013-12-17	1.66	1	2012-11-07	1	0	0	0	0	0	0	0	0	0	0	0	2
2007-10-22	2007	1942-12-15	1	64.85	2	2	1489	0	0	#NULL!	2013-12-31	6.19	0	#NULL!	1	1	0	0	0	0	1	1	0	0	0	0	#NULL!
2013-02-20	2013	1948-04-15	1	64.85	1	3	1489	0	0	#NULL!	2013-12-31	0.86	0	#NULL!	1	0	0	0	0	1	1	0	1	1	0	0	#NULL!
2011-04-22	2011	1946-06-15	1	64.85	1	3	1459	1	0	#NULL!	2013-12-31	2.69	0	#NULL!	0	0	0	0	0	0	0	0	0	0	0	0	#NULL!
2002-09-20	2002	1937-11-15	1	64.85	1	1	1410	1	1	2003-11-02	2003-11-02	1.12	0	#NULL!	0	0	0	0	0	0	0	0	0	0	0	0	1
2009-06-17	2009	1944-08-15	1	64.84	3	3	1450	1	1	2013-05-15	2013-05-15	3.91	0	#NULL!	0	0	0	0	0	1	1	0	1	0	0	1	4
2001-04-19	2001	1936-06-15	0	64.84	3	2	1479	0	1	2011-02-12	2011-02-12	9.82	0	#NULL!	0	0	0	0	0	0	1	1	0	0	0	0	10
2001-10-17	2001	1936-12-15	1	64.84	3	1	1479	0	1	2003-09-22	2003-09-22	1.93	0	#NULL!	0	1	0	0	0	1	1	0	0	0	0	0	2
2007-05-18	2007	1942-07-15	1	64.84	3	2	1450	1	1	2012-05-17	2012-05-17	5	0	#NULL!	0	0	0	0	0	1	0	1	0	0	0	0	5
2013-03-19	2013	1948-05-15	1	64.84	2	2	1401	1	1	2013-07-11	2013-07-11	0.31	0	#NULL!	1	0	0	0	0	0	1	0	0	0	0	0	0
2008-06-17	2008	1943-08-15	1	64.84	2	1	1419	1	0	#NULL!	2013-12-31	5.54	0	#NULL!	1	0	0	0	0	0	0	0	0	0	0	0	#NULL!
2003-10-16	2003	1938-12-15	1	64.84	2	3	1470	0	1	2006-04-03	2006-04-03	2.46	0	#NULL!	0	0	0	0	0	1	1	1	0	0	0	0	2
2007-11-19	2007	1943-01-15	1	64.84	2	2	1610	0	0	#NULL!	2013-12-31	6.12	0	#NULL!	1	0	0	0	0	0	0	0	0	0	0	0	#NULL!
2005-09-19	2005	1940-11-15	1	64.84	2	2	1619	0	0	#NULL!	2013-12-31	8.28	0	#NULL!	0	0	0	0	0	0	0	0	0	0	0	0	#NULL!
2010-12-20	2010	1946-02-15	1	64.84	1	1	1419	1	1	2013-07-08	2013-07-08	2.55	0	#NULL!	0	0	0	0	0	1	1	1	1	0	0	0	3
2002-08-19	2002	1937-10-15	1	64.84	1	2	1499	0	1	2003-04-09	2003-04-09	0.64	0	#NULL!	1	0	0	0	0	1	0	1	0	0	0	0	1
2008-09-17	2008	1943-11-15	1	64.84	1	3	1618	0	0	#NULL!	2013-12-31	5.29	0	#NULL!	0	0	0	0	0	0	0	0	0	0	0	0	#NULL!
2007-08-16	2007	1942-10-15	1	64.84	1	2	1479	0	0	#NULL!	2013-12-31	6.38	1	2007-08-23	1	0	0	0	0	1	1	1	0	0	0	0	#NULL!
2000-01-14	2000	1935-03-15	1	64.84	1	1	1479	0	1	2012-04-15	2012-04-15	12.25	0	#NULL!	1	1	0	0	0	1	1	0	0	0	0	0	12
2008-02-12	2008	1943-04-15	1	64.83	3	2	1489	0	1	2009-04-17	2009-04-17	1.18	0	#NULL!	0	0	0	0	0	0	1	0	0	0	0	0	1
2011-02-11	2011	1946-04-15	1	64.83	3	1	1611	0	0	#NULL!	2013-12-31	2.89	0	#NULL!	1	0	0	0	0	0	0	1	1	0	0	0	#NULL!
2007-03-15	2007	1942-05-15	1	64.83	3	2	1430	1	0	#NULL!	2013-12-31	6.8	1	2010-10-09	0	0	0	0	0	0	0	1	1	0	0	1	#NULL!
2010-12-14	2010	1946-02-15	1	64.83	3	2	1479	0	0	#NULL!	2013-12-31	3.05	0	#NULL!	1	0	0	0	0	0	0	0	0	0	0	0	#NULL!
2001-05-14	2001	1936-07-15	1	64.83	2	1	1419	1	1	2001-09-27	2001-09-27	0.37	0	#NULL!	1	0	0	0	0	0	0	0	0	0	0	0	0
2013-02-13	2013	1948-04-15	1	64.83	2	3	1401	1	0	#NULL!	2013-12-31	0.88	0	#NULL!	0	0	0	0	0	0	0	0	0	0	0	1	#NULL!
2007-06-13	2007	1942-08-15	1	64.83	1	3	1479	0	0	#NULL!	2013-12-31	6.55	0	#NULL!	0	0	0	0	0	0	1	1	1	0	0	0	#NULL!
2008-08-12	2008	1943-10-15	1	64.83	1	2	1429	1	0	#NULL!	2013-12-31	5.39	0	#NULL!	0	0	0	0	0	0	0	0	0	0	0	0	#NULL!
2011-08-10	2011	1946-10-15	1	64.82	4	2	1460	0	1	2012-02-05	2012-02-05	0.49	0	#NULL!	1	0	0	0	0	0	1	0	0	0	0	0	0
2005-07-12	2005	1940-09-15	1	64.82	3	1	1479	0	1	2007-02-13	2007-02-13	1.59	0	#NULL!	1	0	0	0	0	0	0	0	0	0	0	0	2
2003-09-10	2003	1938-11-15	0	64.82	3	2	1479	0	0	#NULL!	2013-12-31	10.31	0	#NULL!	0	0	0	0	0	0	1	0	0	0	0	0	#NULL!
2012-05-09	2012	1947-07-15	1	64.82	3	2	1419	1	0	#NULL!	2013-12-31	1.65	0	#NULL!	1	0	0	0	0	0	0	0	0	0	0	0	#NULL!
2002-11-11	2002	1938-01-15	1	64.82	2	2	1479	0	1	2011-07-27	2011-07-27	8.71	0	#NULL!	1	0	0	0	0	0	0	0	0	0	0	0	9
2007-07-11	2007	1942-09-15	1	64.82	2	2	1419	1	1	2009-03-06	2009-03-06	1.65	0	#NULL!	1	0	0	0	0	1	1	1	0	0	0	0	2
2004-09-08	2004	1939-11-15	1	64.82	2	2	1439	1	1	2005-11-08	2005-11-08	1.17	0	#NULL!	1	0	0	0	0	0	0	0	0	0	0	0	1
2006-01-09	2006	1941-03-15	0	64.82	1	2	1479	0	0	#NULL!	2013-12-31	7.98	1	2006-07-26	1	0	0	0	0	0	1	1	1	0	0	0	#NULL!
2011-08-12	2011	1946-10-15	1	64.82	1	2	1450	1	0	#NULL!	2013-12-31	2.39	0	#NULL!	1	0	0	0	0	0	1	0	0	0	0	0	#NULL!
2006-06-08	2006	1941-08-15	1	64.81	4	2	1489	0	1	2006-11-11	2006-11-11	0.43	0	#NULL!	1	0	0	0	0	0	1	0	0	0	0	0	0
2011-11-07	2011	1947-01-15	1	64.81	3	2	1479	0	0	#NULL!	2013-12-31	2.15	0	#NULL!	1	0	0	0	0	1	0	1	0	0	0	0	#NULL!
2008-03-05	2008	1943-05-15	1	64.81	2	2	1410	1	0	#NULL!	2013-12-31	5.82	0	#NULL!	1	0	0	0	0	1	1	0	0	0	0	0	#NULL!
2011-12-07	2011	1947-02-15	1	64.81	2	1	1460	0	1	2013-08-04	2013-08-04	1.66	0	#NULL!	0	0	0	0	0	0	0	1	0	0	0	0	2
2003-08-08	2003	1938-10-15	1	64.81	2	2	1430	1	1	2004-02-10	2004-02-10	0.51	0	#NULL!	1	0	0	0	0	1	0	0	0	0	0	0	1
2005-03-07	2005	1940-05-15	1	64.81	1	3	1489	0	0	#NULL!	2013-12-31	8.82	1	2008-09-22	0	0	0	0	0	0	1	0	0	0	0	0	#NULL!
2012-10-05	2012	1947-12-15	0	64.81	1	3	1419	1	1	2013-04-04	2013-04-04	0.5	0	#NULL!	1	0	0	0	0	0	0	0	0	0	0	0	0
2007-05-07	2007	1942-07-15	1	64.81	1	3	1479	0	1	2012-02-20	2012-02-20	4.79	0	#NULL!	0	0	0	0	0	0	0	0	0	0	0	0	5
2001-10-08	2001	1936-12-15	1	64.81	1	1	1459	1	1	2002-06-30	2002-06-30	0.73	0	#NULL!	1	0	0	0	0	0	0	0	0	0	0	0	1
2010-05-03	2010	1945-07-15	1	64.8	3	2	1479	0	1	2011-03-20	2011-03-20	0.88	0	#NULL!	1	0	0	0	0	0	0	0	0	1	0	0	1
2004-02-02	2004	1939-04-15	1	64.8	3	2	1479	0	1	2005-09-10	2005-09-10	1.6	0	#NULL!	1	0	0	0	0	0	1	0	0	0	0	0	2
2008-07-03	2008	1943-09-15	1	64.8	3	3	1459	1	1	2010-05-02	2010-05-02	1.83	0	#NULL!	0	0	0	0	0	1	1	1	1	0	0	0	2
2004-02-03	2004	1939-04-15	1	64.8	2	2	1450	1	1	2010-04-24	2010-04-24	6.22	0	#NULL!	0	0	0	0	0	1	0	0	0	0	0	0	6
2008-09-02	2008	1943-11-15	1	64.8	2	2	1490	0	0	#NULL!	2013-12-31	5.33	0	#NULL!	1	0	0	0	0	0	0	0	0	0	0	0	#NULL!
2005-06-03	2005	1940-08-15	1	64.8	2	2	1430	1	1	2005-10-18	2005-10-18	0.38	0	#NULL!	1	0	0	0	0	0	0	0	0	0	0	0	0
2009-10-02	2009	1944-12-15	1	64.8	2	2	1439	1	0	#NULL!	2013-12-31	4.25	0	#NULL!	1	0	0	0	0	0	1	0	1	0	0	0	#NULL!
2013-06-04	2013	1948-08-15	1	64.8	1	2	1419	1	0	#NULL!	2013-12-31	0.57	0	#NULL!	0	0	0	0	0	0	0	0	0	0	0	0	#NULL!
2004-09-01	2004	1939-11-15	1	64.8	1	1	1412	1	0	#NULL!	2013-12-31	9.33	0	#NULL!	0	0	0	0	0	0	0	0	0	0	0	0	#NULL!
2008-07-02	2008	1943-09-15	1	64.8	1	1	1456	1	0	#NULL!	2013-12-31	5.5	0	#NULL!	0	0	0	0	0	1	1	1	0	1	0	0	#NULL!
2009-04-29	2009	1944-07-15	1	64.79	3	1	1419	1	1	2011-04-28	2011-04-28	2	0	#NULL!	1	0	0	0	0	1	1	1	0	0	0	0	2
2011-08-29	2011	1946-11-15	1	64.79	2	2	1611	0	1	2013-04-07	2013-04-07	1.61	0	#NULL!	1	1	0	0	0	0	0	0	0	0	0	0	2
2010-07-01	2010	1945-09-15	1	64.79	2	2	1450	1	0	#NULL!	2013-12-31	3.5	0	#NULL!	0	0	0	0	0	1	1	1	1	0	0	0	#NULL!
2010-08-30	2010	1945-11-15	1	64.79	1	3	1488	0	1	2011-02-08	2011-02-08	0.44	0	#NULL!	1	0	0	0	0	0	0	0	0	0	0	0	0
2011-06-28	2011	1946-09-15	1	64.78	4	2	1419	1	1	2013-02-10	2013-02-10	1.62	0	#NULL!	1	0	0	0	0	0	0	0	0	0	0	0	2
2006-06-28	2006	1941-09-15	0	64.78	3	3	1479	0	0	#NULL!	2013-12-31	7.51	0	#NULL!	1	0	0	0	0	0	0	0	0	0	0	0	#NULL!
2004-10-27	2004	1940-01-15	1	64.78	1	2	1450	1	1	2012-12-29	2012-12-29	8.17	0	#NULL!	0	0	0	0	0	1	1	0	1	0	0	0	8
2006-08-22	2006	1941-11-15	1	64.77	2	3	1619	0	1	2007-03-09	2007-03-09	0.54	0	#NULL!	1	0	0	0	0	0	0	0	0	0	0	0	1
2004-03-24	2004	1939-06-15	1	64.77	1	2	1489	0	0	#NULL!	2013-12-31	9.77	0	#NULL!	1	0	0	0	0	0	0	0	0	0	0	0	#NULL!
2001-02-20	2001	1936-05-15	0	64.77	1	2	1479	0	1	2002-09-19	2002-09-19	1.58	0	#NULL!	0	0	0	0	0	0	1	0	0	0	0	0	2
2004-11-19	2004	1940-02-15	0	64.76	1	3	1479	0	0	#NULL!	2013-12-31	9.11	0	#NULL!	1	1	0	0	0	0	0	0	0	0	0	0	#NULL!
2011-04-20	2011	1946-07-15	1	64.76	1	3	1461	0	1	2012-04-18	2012-04-18	1	0	#NULL!	1	0	0	0	0	0	0	0	0	0	0	0	1
2000-10-16	2000	1936-01-15	1	64.75	3	3	1479	0	1	2007-10-18	2007-10-18	7	0	#NULL!	0	0	0	0	0	0	0	0	0	0	0	0	7
2010-03-15	2010	1945-06-15	1	64.75	3	1	1431	1	0	#NULL!	2013-12-31	3.8	0	#NULL!	0	0	0	0	0	0	0	0	0	0	0	1	#NULL!
2010-04-15	2010	1945-07-15	1	64.75	3	3	1410	1	1	2010-09-18	2010-09-18	0.43	0	#NULL!	1	0	0	0	0	0	0	0	0	0	0	0	0
2013-06-17	2013	1948-09-15	1	64.75	3	2	1459	1	0	#NULL!	2013-12-31	0.54	0	#NULL!	0	0	0	0	0	1	1	1	0	0	0	0	#NULL!
2003-04-16	2003	1938-07-15	0	64.75	3	1	1489	0	1	2013-07-10	2013-07-10	10.23	0	#NULL!	0	0	0	0	0	1	0	0	0	0	0	0	10
2009-09-14	2009	1944-12-15	1	64.75	1	2	1430	1	0	#NULL!	2013-12-31	4.3	0	#NULL!	1	0	0	0	0	0	1	0	0	0	0	0	#NULL!
2004-04-13	2004	1939-07-15	1	64.75	1	1	1619	0	1	2009-08-28	2009-08-28	5.37	0	#NULL!	1	0	0	0	0	0	0	0	0	0	0	0	5
2002-10-11	2002	1938-01-15	0	64.74	4	2	1456	1	1	2003-06-04	2003-06-04	0.65	0	#NULL!	0	0	0	0	0	0	1	0	0	0	0	0	1
2011-07-11	2011	1946-10-15	1	64.74	2	2	1488	0	1	2013-01-13	2013-01-13	1.51	0	#NULL!	1	0	0	0	0	0	1	0	0	0	0	0	2
2000-02-10	2000	1935-05-15	0	64.74	2	2	1439	1	0	#NULL!	2013-12-31	13.89	0	#NULL!	0	0	0	0	0	1	1	0	0	0	0	0	#NULL!
2006-12-11	2006	1942-03-15	1	64.74	1	1	1450	1	0	#NULL!	2013-12-31	7.06	1	2007-07-05	1	0	0	0	0	0	0	0	1	0	0	0	#NULL!
2011-07-11	2011	1946-10-15	1	64.74	1	3	1460	0	1	2012-07-17	2012-07-17	1.02	0	#NULL!	0	0	0	0	0	0	0	0	0	0	0	0	1
2005-05-10	2005	1940-08-15	1	64.73	3	2	1419	1	1	2005-10-24	2005-10-24	0.46	0	#NULL!	1	0	0	0	0	0	0	0	0	0	0	0	0
2003-06-08	2003	1938-09-15	1	64.73	3	2	1489	0	1	2004-01-08	2004-01-08	0.59	0	#NULL!	1	0	0	0	0	0	0	0	0	0	0	0	1
2012-05-07	2012	1947-08-15	1	64.73	3	3	1419	1	1	2012-11-12	2012-11-12	0.52	0	#NULL!	1	1	0	0	0	1	1	1	1	0	1	0	1
2000-04-05	2000	1935-07-15	0	64.73	3	2	1419	1	1	2001-07-22	2001-07-22	1.3	0	#NULL!	0	0	0	0	0	0	0	0	0	0	0	0	1
2006-05-08	2006	1941-08-15	1	64.73	2	1	1489	0	1	2007-01-20	2007-01-20	0.7	0	#NULL!	0	0	0	0	0	0	0	0	0	0	0	1	1
2008-11-06	2008	1944-02-15	0	64.73	2	2	1479	0	1	2009-07-21	2009-07-21	0.7	0	#NULL!	1	0	0	0	0	1	1	1	0	1	0	0	1
2008-05-07	2008	1943-08-15	1	64.73	2	3	1459	1	1	2008-07-31	2008-07-31	0.23	0	#NULL!	1	0	0	0	0	1	0	1	0	0	0	1	0
2006-12-05	2006	1942-03-15	1	64.73	2	1	1619	0	1	2008-09-04	2008-09-04	1.75	0	#NULL!	1	0	0	0	0	1	0	0	0	0	0	0	2
2004-07-06	2004	1939-10-15	1	64.73	2	2	1489	0	1	2007-03-03	2007-03-03	2.66	0	#NULL!	0	1	0	0	0	0	1	0	1	0	0	0	3
2003-12-08	2003	1939-03-15	1	64.73	2	1	1479	0	1	2005-08-10	2005-08-10	1.67	0	#NULL!	1	0	0	0	0	0	1	1	0	0	0	0	2
2009-07-08	2009	1944-10-15	1	64.73	1	2	1479	0	0	#NULL!	2013-12-31	4.48	0	#NULL!	1	0	0	0	0	0	1	0	0	0	0	0	#NULL!
2008-07-08	2008	1943-10-15	1	64.73	1	2	1450	1	0	#NULL!	2013-12-31	5.48	0	#NULL!	1	0	0	0	0	1	0	0	0	0	0	0	#NULL!
2008-04-08	2008	1943-07-15	1	64.73	1	2	1412	1	1	2012-01-13	2012-01-13	3.76	0	#NULL!	0	0	0	0	0	0	0	0	0	0	0	0	4
2011-02-07	2011	1946-05-15	1	64.73	1	2	1431	1	0	#NULL!	2013-12-31	2.9	0	#NULL!	1	0	0	0	0	0	1	0	0	0	0	0	#NULL!
2013-11-05	2013	1949-02-15	1	64.72	3	2	1450	1	0	#NULL!	2013-12-31	0.15	0	#NULL!	1	1	0	0	0	1	1	1	0	0	0	0	#NULL!
2008-12-04	2008	1944-03-15	1	64.72	3	2	1461	0	1	2010-10-05	2010-10-05	1.83	0	#NULL!	1	0	0	0	0	1	1	0	1	0	0	0	2
2006-09-04	2006	1941-12-15	1	64.72	2	2	1450	1	1	2008-11-10	2008-11-10	2.18	0	#NULL!	0	0	0	0	0	1	1	0	0	0	0	0	2
2012-10-03	2012	1948-01-15	0	64.72	1	3	1479	0	0	#NULL!	2013-12-31	1.24	1	2012-10-15	1	1	0	0	0	0	1	1	0	0	0	0	#NULL!
2000-10-05	2000	1936-01-15	1	64.72	1	2	1463	0	1	2007-03-24	2007-03-24	6.46	1	2004-12-01	1	0	0	1	0	0	0	0	0	1	0	0	6
2011-01-03	2011	1946-04-15	1	64.72	1	2	1489	0	1	2011-05-26	2011-05-26	0.39	0	#NULL!	1	1	0	0	0	1	1	1	0	0	0	1	0
2013-11-05	2013	1949-02-15	1	64.72	1	2	1450	1	0	#NULL!	2013-12-31	0.15	0	#NULL!	0	1	0	0	0	1	1	1	1	0	0	0	#NULL!
2012-11-01	2012	1948-02-15	0	64.71	3	2	1429	1	0	#NULL!	2013-12-31	1.16	0	#NULL!	0	0	0	0	0	1	1	0	0	0	0	0	#NULL!
2005-10-31	2005	1941-02-15	1	64.71	3	2	1460	0	1	2008-11-12	2008-11-12	3.03	0	#NULL!	1	0	0	0	0	0	0	0	0	0	0	0	3
2010-03-03	2010	1945-06-15	1	64.71	3	1	1419	1	0	#NULL!	2013-12-31	3.83	0	#NULL!	0	0	0	0	0	0	0	0	1	0	0	0	#NULL!
2005-11-02	2005	1941-02-15	1	64.71	3	2	1479	0	1	2008-12-02	2008-12-02	3.08	0	#NULL!	0	0	0	0	0	0	0	0	0	0	0	0	3
2009-04-01	2009	1944-07-15	1	64.71	2	2	1409	1	0	#NULL!	2013-12-31	4.75	0	#NULL!	0	0	0	0	0	0	0	1	0	0	0	0	#NULL!
2007-10-01	2007	1943-01-15	1	64.71	2	3	1618	0	1	2009-07-31	2009-07-31	1.83	0	#NULL!	1	0	0	0	0	0	0	0	0	0	0	1	2
2009-08-03	2009	1944-11-15	1	64.71	2	2	1489	0	0	#NULL!	2013-12-31	4.41	0	#NULL!	1	1	0	0	0	0	1	1	0	0	0	1	#NULL!
2001-07-03	2001	1936-10-15	1	64.71	2	1	1479	0	1	2007-09-10	2007-09-10	6.19	0	#NULL!	1	1	0	0	0	1	1	0	0	0	0	0	6
2004-04-01	2004	1939-07-15	1	64.71	2	2	1419	1	1	2005-12-11	2005-12-11	1.69	0	#NULL!	1	0	0	0	0	0	0	1	0	0	0	0	2
2000-12-01	2000	1936-03-15	1	64.71	2	2	1619	0	1	2002-09-06	2002-09-06	1.76	0	#NULL!	0	1	0	0	0	1	1	1	1	0	0	0	2
2003-11-03	2003	1939-02-15	1	64.71	1	2	1489	0	1	2004-09-19	2004-09-19	0.88	0	#NULL!	0	0	0	0	0	0	0	0	0	0	0	0	1
2009-08-28	2009	1944-12-15	1	64.7	3	2	1450	1	1	2010-06-23	2010-06-23	0.82	0	#NULL!	0	0	0	0	0	0	0	0	0	0	0	0	1
2004-06-28	2004	1939-10-15	1	64.7	3	1	1479	0	1	2005-11-07	2005-11-07	1.36	0	#NULL!	1	0	0	0	0	0	0	0	0	0	0	0	1
2011-02-24	2011	1946-06-15	1	64.7	2	2	1450	1	1	2012-02-07	2012-02-07	0.95	0	#NULL!	1	0	0	0	0	0	0	0	0	0	0	0	1
2007-12-27	2007	1943-04-15	1	64.7	1	1	1410	1	0	#NULL!	2013-12-31	6.01	0	#NULL!	1	0	0	0	0	0	1	0	0	0	0	0	#NULL!
2008-09-24	2008	1944-01-15	1	64.69	3	2	1479	0	1	2010-05-08	2010-05-08	1.62	0	#NULL!	1	0	0	0	0	0	0	0	0	0	0	0	2
2011-11-21	2011	1947-03-15	1	64.69	3	3	1481	0	0	#NULL!	2013-12-31	2.11	1	2012-02-01	0	0	0	0	0	0	0	0	0	0	0	0	#NULL!
2009-12-24	2009	1945-04-15	1	64.69	1	3	1450	1	1	2010-05-10	2010-05-10	0.38	1	2010-01-02	1	0	0	0	0	0	0	0	0	0	0	0	0
2011-08-25	2011	1946-12-15	0	64.69	1	3	1460	0	0	#NULL!	2013-12-31	2.35	0	#NULL!	1	0	0	0	0	0	1	0	0	0	0	0	#NULL!
2002-02-18	2002	1937-06-15	1	64.68	3	1	1459	1	1	2002-09-28	2002-09-28	0.61	0	#NULL!	1	0	0	0	0	0	0	0	0	0	0	0	1
2006-01-19	2006	1941-05-15	1	64.68	2	3	1469	0	0	#NULL!	2013-12-31	7.95	0	#NULL!	1	1	0	0	0	0	1	1	1	0	0	0	#NULL!
2002-10-21	2002	1938-02-15	1	64.68	2	2	1409	1	1	2004-04-13	2004-04-13	1.48	0	#NULL!	1	0	0	0	0	0	0	0	0	0	0	0	1
2008-05-19	2008	1943-09-15	1	64.68	2	3	1450	1	0	#NULL!	2013-12-31	5.62	0	#NULL!	1	0	0	0	0	1	1	1	0	0	0	0	#NULL!
2011-03-21	2011	1946-07-15	0	64.68	2	2	1479	0	0	#NULL!	2013-12-31	2.78	1	2012-11-09	0	0	0	0	0	0	1	1	0	0	0	0	#NULL!
2010-08-20	2010	1945-12-15	1	64.68	1	3	1460	0	1	2013-04-08	2013-04-08	2.63	0	#NULL!	1	0	0	1	0	1	1	0	0	0	0	0	3
2006-05-22	2006	1941-09-15	1	64.68	1	1	1489	0	1	2007-01-11	2007-01-11	0.64	0	#NULL!	1	0	0	0	0	0	1	0	0	0	0	0	1
2002-04-16	2002	1937-08-15	0	64.67	4	2	1450	1	1	2002-10-27	2002-10-27	0.53	0	#NULL!	1	0	0	0	0	0	0	0	0	0	0	0	1
2011-02-14	2011	1946-06-15	1	64.67	3	2	1479	0	0	#NULL!	2013-12-31	2.88	0	#NULL!	1	0	0	0	0	1	0	1	0	0	0	0	#NULL!
2009-12-15	2009	1945-04-15	1	64.67	3	1	1449	1	0	#NULL!	2013-12-31	4.04	0	#NULL!	0	0	0	0	0	1	1	1	1	0	0	0	#NULL!
2006-03-17	2006	1941-07-15	1	64.67	3	2	1412	1	0	#NULL!	2013-12-31	7.79	0	#NULL!	1	0	0	0	0	0	0	0	0	0	0	0	#NULL!
2004-05-18	2004	1939-09-15	1	64.67	2	2	1479	0	0	#NULL!	2013-12-31	9.62	0	#NULL!	1	0	0	0	0	0	0	0	0	0	0	0	#NULL!
2008-03-17	2008	1943-07-15	1	64.67	1	1	1453	1	1	2009-02-02	2009-02-02	0.88	0	#NULL!	0	1	0	0	0	0	1	0	0	0	0	0	1
2011-02-16	2011	1946-06-15	0	64.67	1	3	1419	1	0	#NULL!	2013-12-31	2.87	0	#NULL!	0	0	0	0	0	1	1	1	1	0	0	1	#NULL!
2008-11-11	2008	1944-03-15	1	64.66	3	2	1611	0	1	2008-12-30	2008-12-30	0.13	0	#NULL!	1	0	0	0	0	1	1	0	1	0	0	0	0
2008-06-13	2008	1943-10-15	1	64.66	3	2	1479	0	1	2012-09-20	2012-09-20	4.27	0	#NULL!	1	1	0	0	0	0	0	0	0	0	0	0	4
2009-07-15	2009	1944-11-15	1	64.66	2	3	1479	0	0	#NULL!	2013-12-31	4.46	0	#NULL!	1	1	0	0	0	1	1	0	0	0	0	0	#NULL!
2002-06-13	2002	1937-10-15	0	64.66	1	2	1479	0	0	#NULL!	2013-12-31	11.55	0	#NULL!	0	0	0	0	0	0	0	0	0	0	0	0	#NULL!
2005-11-10	2005	1941-03-15	1	64.66	1	1	1489	0	0	#NULL!	2013-12-31	8.14	0	#NULL!	1	0	0	0	0	0	0	0	0	0	0	0	#NULL!
2003-05-15	2003	1938-09-15	1	64.66	1	2	1479	0	1	2007-01-03	2007-01-03	3.64	0	#NULL!	1	0	0	0	0	0	0	0	0	0	0	0	4
2012-03-13	2012	1947-07-15	1	64.66	1	3	1410	1	0	#NULL!	2013-12-31	1.8	0	#NULL!	1	0	0	0	0	1	1	0	1	0	0	0	#NULL!
2010-10-12	2010	1946-02-15	1	64.65	3	1	1419	1	0	#NULL!	2013-12-31	3.22	0	#NULL!	0	0	0	0	0	0	0	0	0	0	0	0	#NULL!
2012-10-11	2012	1948-02-15	1	64.65	3	2	1439	1	0	#NULL!	2013-10-25	1.04	0	#NULL!	1	0	0	0	0	1	1	1	0	0	0	0	#NULL!
2011-04-11	2011	1946-08-15	1	64.65	3	2	1450	1	1	2013-01-26	2013-01-26	1.8	0	#NULL!	1	0	0	0	0	0	1	1	0	0	0	0	2
2012-07-09	2012	1947-11-15	1	64.65	1	3	1479	0	0	#NULL!	2013-12-31	1.48	0	#NULL!	1	1	0	0	0	1	1	1	1	0	0	0	#NULL!
2011-09-08	2011	1947-01-15	1	64.65	1	1	1419	1	0	#NULL!	2013-12-31	2.31	1	2011-09-16	0	1	0	0	0	0	1	1	0	1	0	0	#NULL!
2002-09-09	2002	1938-01-15	1	64.65	1	2	1450	1	1	2003-08-22	2003-08-22	0.95	0	#NULL!	0	0	0	0	0	0	0	0	0	0	0	0	1
2006-08-11	2006	1941-12-15	1	64.65	1	1	1479	0	0	#NULL!	2013-12-31	7.39	0	#NULL!	1	0	0	0	0	0	0	0	0	0	0	0	#NULL!
2006-02-07	2006	1941-06-15	1	64.65	1	1	1479	0	1	2006-11-21	2006-11-21	0.79	1	2006-05-19	1	0	1	0	0	0	1	0	0	0	0	0	1
2011-10-11	2011	1947-02-15	1	64.65	1	1	1419	1	0	#NULL!	2013-12-31	2.22	0	#NULL!	1	0	0	0	0	0	0	0	0	0	0	0	#NULL!
2009-05-06	2009	1944-09-15	1	64.64	3	2	1419	1	1	2009-11-29	2009-11-29	0.57	0	#NULL!	1	0	0	0	0	0	1	1	0	0	0	0	1
2003-10-06	2003	1939-02-15	1	64.64	3	3	147	0	0	#NULL!	2013-12-31	10.24	1	2003-11-11	1	0	0	0	0	0	1	1	0	0	0	0	#NULL!
2007-01-03	2007	1942-05-15	1	64.64	3	2	1610	0	1	2007-11-26	2007-11-26	0.9	0	#NULL!	0	0	0	0	0	1	1	0	0	0	0	0	1
2008-05-06	2008	1943-09-15	1	64.64	3	2	1460	0	0	#NULL!	2013-12-31	5.65	0	#NULL!	0	0	0	0	0	0	1	0	0	0	0	0	#NULL!
2013-01-03	2013	1948-05-15	1	64.64	2	2	1419	1	1	2013-05-20	2013-05-20	0.38	0	#NULL!	1	0	0	0	0	1	1	0	1	0	0	0	0
2012-10-07	2012	1948-02-15	1	64.64	1	3	1460	0	0	#NULL!	2013-12-27	1.22	0	#NULL!	1	0	0	0	0	0	0	0	0	0	0	0	#NULL!
2002-06-04	2002	1937-10-15	1	64.64	1	1	149	0	1	2002-12-31	2002-12-31	0.57	0	#NULL!	1	0	0	0	0	0	0	0	0	0	0	0	1
2010-04-06	2010	1945-08-15	1	64.64	1	3	1489	0	1	2013-01-23	2013-01-23	2.8	1	2011-05-26	1	0	0	0	0	0	0	0	0	0	0	0	3
2006-09-04	2006	1942-01-15	1	64.64	1	1	1459	1	1	2011-12-27	2011-12-27	5.31	0	#NULL!	1	0	0	0	0	0	1	1	1	0	0	0	5
2005-01-05	2005	1940-05-15	0	64.64	1	3	1479	0	1	2005-05-03	2005-05-03	0.32	0	#NULL!	1	0	0	0	0	0	0	0	0	0	0	0	0
2005-01-03	2005	1940-05-15	1	64.64	1	3	1479	0	0	#NULL!	2013-12-31	8.99	0	#NULL!	0	0	0	0	0	0	1	0	0	0	0	0	#NULL!
2012-11-01	2012	1948-03-15	1	64.63	3	3	1431	1	1	2013-08-02	2013-08-02	0.75	0	#NULL!	1	0	0	0	0	0	1	0	0	0	0	1	1
2003-04-03	2003	1938-08-15	1	64.63	3	2	1479	0	0	#NULL!	2013-12-31	10.75	0	#NULL!	0	0	0	0	0	0	0	0	0	0	0	0	#NULL!
2007-04-03	2007	1942-08-15	0	64.63	2	2	1419	1	1	2008-04-23	2008-04-23	1.06	0	#NULL!	1	0	0	0	0	0	1	0	0	0	0	0	1
2003-04-01	2003	1938-08-15	1	64.63	2	2	1479	0	1	2007-10-30	2007-10-30	4.58	0	#NULL!	1	0	0	0	0	0	0	0	0	0	0	0	5
2000-07-03	2000	1935-11-15	1	64.63	1	1	1450	1	1	2000-10-14	2000-10-14	0.28	0	#NULL!	0	0	0	0	0	0	0	0	0	0	0	0	0
2012-05-01	2012	1947-09-15	1	64.63	1	2	1410	1	1	2013-09-18	2013-09-18	1.38	0	#NULL!	1	0	0	0	0	1	1	1	0	0	0	0	1
2012-01-31	2012	1947-06-15	1	64.63	1	2	1479	0	0	#NULL!	2013-12-31	1.92	0	#NULL!	1	0	0	0	0	0	0	0	0	0	0	0	#NULL!
2003-10-29	2003	1939-03-15	1	64.62	3	1	1489	0	1	2007-07-13	2007-07-13	3.7	0	#NULL!	0	0	0	0	0	0	0	0	0	0	0	0	4
2001-05-01	2001	1936-09-15	1	64.62	3	2	1479	0	1	2003-02-24	2003-02-24	1.82	0	#NULL!	0	0	0	0	0	1	1	0	1	0	0	0	2
2005-08-29	2005	1941-01-15	1	64.62	2	3	1419	1	1	2007-05-19	2007-05-19	1.72	0	#NULL!	0	0	0	0	0	0	1	0	0	0	0	0	2
2000-06-29	2000	1935-11-15	1	64.62	2	1	1479	0	1	2001-03-08	2001-03-08	0.69	0	#NULL!	1	0	0	0	0	0	1	0	0	0	0	0	1
2008-04-28	2008	1943-09-15	1	64.62	1	2	1450	1	0	#NULL!	2013-12-31	5.68	0	#NULL!	1	0	0	0	0	1	1	1	1	0	0	1	#NULL!
2005-04-28	2005	1940-09-15	0	64.62	1	2	1479	0	1	2005-09-13	2005-09-13	0.38	0	#NULL!	1	0	0	0	0	0	0	0	0	0	0	0	0
2004-01-26	2004	1939-06-15	1	64.62	1	2	1479	0	0	#NULL!	2013-12-31	9.93	0	#NULL!	1	1	0	0	0	1	1	1	1	0	0	0	#NULL!
2010-06-27	2010	1945-11-15	1	64.61	4	2	1410	1	1	2011-07-02	2011-07-02	1.01	0	#NULL!	0	0	0	0	0	0	1	0	0	0	0	0	1
2002-03-25	2002	1937-08-15	0	64.61	1	1	1479	0	0	#NULL!	2013-12-31	11.77	0	#NULL!	1	0	0	1	0	0	1	0	0	0	0	0	#NULL!
2003-12-23	2003	1939-05-15	0	64.61	1	1	1479	0	1	2004-05-02	2004-05-02	0.36	1	2004-03-02	0	0	0	0	0	0	0	0	0	0	0	0	0
2005-10-24	2005	1941-03-15	1	64.61	1	3	1479	0	1	2006-08-05	2006-08-05	0.78	0	#NULL!	1	0	0	0	0	0	0	0	0	1	0	0	1
2008-02-21	2008	1943-07-15	1	64.61	1	2	1619	0	0	#NULL!	2011-03-09	3.04	0	#NULL!	0	1	0	0	0	0	0	0	0	0	0	0	#NULL!
2012-10-23	2012	1948-03-15	1	64.61	1	1	142	1	0	#NULL!	2013-12-31	1.19	0	#NULL!	0	0	0	0	0	0	0	0	0	0	0	0	#NULL!
2007-11-19	2007	1943-04-15	1	64.6	2	3	1419	1	0	#NULL!	2013-12-31	6.12	1	2007-12-06	1	1	0	0	0	0	1	1	0	1	0	0	#NULL!
2005-09-23	2005	1941-02-15	1	64.6	2	3	1410	1	1	2006-11-24	2006-11-24	1.17	0	#NULL!	1	0	1	0	0	0	0	1	0	1	0	0	1
2011-09-21	2011	1947-02-15	1	64.6	1	1	1459	1	0	#NULL!	2013-12-31	2.28	0	#NULL!	1	0	0	0	0	1	1	1	1	1	0	1	#NULL!
2001-08-23	2001	1937-01-15	0	64.6	1	1	1479	0	1	2013-04-04	2013-04-04	11.61	0	#NULL!	1	0	0	0	0	0	0	0	0	0	0	0	12
2001-06-22	2001	1936-11-15	1	64.6	1	3	1479	0	1	2004-08-03	2004-08-03	3.12	0	#NULL!	1	1	0	0	0	0	1	1	1	0	0	0	3
2002-05-23	2002	1937-10-15	1	64.6	1	2	1450	1	0	#NULL!	2013-12-31	11.61	0	#NULL!	0	0	0	0	0	0	0	0	0	0	0	0	#NULL!
2011-02-17	2011	1946-07-15	1	64.59	3	2	1481	0	1	2012-07-25	2012-07-25	1.43	1	2011-04-13	1	0	0	0	0	0	1	0	1	0	0	1	1
2012-07-16	2012	1947-12-15	1	64.59	3	2	1489	0	0	#NULL!	2013-12-31	1.46	0	#NULL!	1	0	0	0	0	0	0	0	0	0	0	0	#NULL!
2009-04-20	2009	1944-09-15	1	64.59	3	1	1450	1	1	2012-01-25	2012-01-25	2.77	0	#NULL!	1	0	0	0	0	1	1	0	0	1	0	0	3
2010-11-16	2010	1946-04-15	1	64.59	3	3	1611	0	0	#NULL!	2013-12-31	3.12	0	#NULL!	0	0	0	0	0	1	0	1	0	0	0	0	#NULL!
2004-08-17	2004	1940-01-15	1	64.59	2	1	1489	0	1	2005-11-10	2005-11-10	1.23	0	#NULL!	1	0	0	0	0	0	1	0	0	0	0	1	1
2008-08-18	2008	1944-01-15	1	64.59	2	2	1489	0	1	2012-06-07	2012-06-07	3.8	0	#NULL!	1	0	0	0	0	0	1	1	1	0	0	0	4
2007-10-18	2007	1943-03-15	1	64.59	2	1	1610	0	1	2009-04-25	2009-04-25	1.52	0	#NULL!	1	0	0	0	0	0	0	0	0	0	0	0	2
2001-05-17	2001	1936-10-15	1	64.59	2	2	1479	0	1	2002-01-31	2002-01-31	0.71	0	#NULL!	0	1	0	1	0	1	1	0	0	0	0	0	1
2007-04-20	2007	1942-09-15	1	64.59	2	2	1450	1	1	2008-02-02	2008-02-02	0.79	0	#NULL!	1	0	0	0	0	0	0	0	0	0	0	1	1
2005-06-20	2005	1940-11-15	1	64.59	2	1	1460	0	0	#NULL!	2013-12-31	8.53	0	#NULL!	1	0	0	0	0	0	0	0	1	0	0	0	#NULL!
2006-11-16	2006	1942-04-15	0	64.59	1	2	147	0	0	#NULL!	2013-12-31	7.12	0	#NULL!	0	0	0	0	0	0	0	0	0	0	0	0	#NULL!
2012-04-17	2012	1947-09-15	1	64.59	1	1	1489	0	0	#NULL!	2013-12-31	1.71	0	#NULL!	1	1	0	0	0	1	1	1	0	0	0	0	#NULL!
2010-08-20	2010	1946-01-15	1	64.59	1	3	1619	0	0	#NULL!	2013-12-31	3.36	0	#NULL!	1	1	0	1	0	0	1	1	0	0	0	0	#NULL!
2008-06-13	2008	1943-11-15	0	64.58	2	2	1420	1	0	#NULL!	2013-12-31	5.55	0	#NULL!	0	0	0	0	0	0	1	1	1	0	0	0	#NULL!
2007-11-13	2007	1943-04-15	1	64.58	2	2	1489	0	0	#NULL!	2013-12-31	6.13	0	#NULL!	1	0	0	0	0	0	0	0	0	0	0	0	#NULL!
2001-09-14	2001	1937-02-15	1	64.58	1	1	1479	0	0	#NULL!	2013-12-31	12.3	1	2008-03-26	0	0	0	0	0	0	0	0	0	0	0	0	#NULL!
2009-10-14	2009	1945-03-15	1	64.58	1	3	1450	1	0	#NULL!	2013-12-31	4.21	0	#NULL!	1	0	0	0	0	0	1	1	0	0	0	0	#NULL!
2011-11-08	2011	1947-04-15	1	64.57	3	1	1419	1	0	#NULL!	2013-12-31	2.15	0	#NULL!	0	1	0	0	0	1	1	1	0	0	0	0	#NULL!
2010-09-13	2010	1946-02-15	1	64.57	3	3	1619	0	0	#NULL!	2013-12-31	3.3	0	#NULL!	0	0	0	0	0	1	0	0	0	0	0	0	#NULL!
2003-01-09	2003	1938-06-15	1	64.57	2	2	145	1	1	2005-10-22	2005-10-22	2.78	0	#NULL!	0	0	0	0	0	0	1	1	1	0	0	0	3
2010-04-12	2010	1945-09-15	1	64.57	2	1	1479	0	1	2011-10-09	2011-10-09	1.49	0	#NULL!	1	0	0	1	0	0	1	0	0	0	0	0	1
2007-01-08	2007	1942-06-15	1	64.57	2	3	1453	1	0	#NULL!	2013-12-31	6.98	0	#NULL!	0	0	0	0	0	0	0	0	0	0	0	0	#NULL!
2005-11-10	2005	1941-04-15	1	64.57	2	3	1619	0	1	2008-03-05	2008-03-05	2.32	0	#NULL!	1	0	0	0	0	0	1	1	1	0	0	1	2
2012-07-09	2012	1947-12-15	1	64.57	1	1	146	0	1	2013-02-25	2013-02-25	0.63	0	#NULL!	0	0	0	0	0	0	0	0	0	1	0	0	1
2006-03-12	2006	1941-08-15	0	64.57	1	2	1450	1	1	2006-06-13	2006-06-13	0.25	0	#NULL!	1	0	0	0	0	0	1	0	0	0	0	1	0
2010-06-10	2010	1945-11-15	1	64.57	1	3	1610	0	0	#NULL!	2013-12-31	3.56	0	#NULL!	1	0	0	0	0	0	0	0	0	0	0	0	#NULL!
2007-04-09	2007	1942-09-15	1	64.56	4	2	1450	1	0	#NULL!	2013-12-31	6.73	0	#NULL!	1	0	0	0	0	0	0	0	0	0	0	0	#NULL!
2004-04-05	2004	1939-09-15	1	64.56	4	3	1489	0	1	2005-05-22	2005-05-22	1.13	0	#NULL!	0	0	0	0	0	0	0	0	0	0	0	0	1
2010-10-06	2010	1946-03-15	1	64.56	3	1	1479	0	0	#NULL!	2013-12-31	3.24	1	2010-10-19	0	0	0	0	0	0	0	0	0	0	0	0	#NULL!
2009-04-09	2009	1944-09-15	1	64.56	3	1	1412	1	1	2010-02-22	2010-02-22	0.87	0	#NULL!	1	0	0	0	0	0	0	0	0	0	0	0	1
2005-01-06	2005	1940-06-15	1	64.56	2	2	1469	0	1	2009-02-07	2009-02-07	4.09	1	2005-01-12	1	0	0	0	0	0	0	0	0	0	0	0	4
2005-12-06	2005	1941-05-15	1	64.56	2	2	1459	1	1	2006-08-10	2006-08-10	0.68	0	#NULL!	1	0	0	0	0	0	1	0	0	0	0	1	1
2001-12-05	2001	1937-05-15	1	64.56	2	2	1619	0	1	2003-11-30	2003-11-30	1.98	0	#NULL!	0	0	0	0	0	0	0	1	0	0	0	0	2
2004-10-05	2004	1940-03-15	1	64.56	2	2	1619	0	1	2005-04-20	2005-04-20	0.54	0	#NULL!	0	0	0	0	0	0	1	0	0	0	0	0	1
2009-04-09	2009	1944-09-15	1	64.56	2	1	1479	0	1	2012-08-23	2012-08-23	3.37	0	#NULL!	1	0	0	0	0	1	0	0	0	0	0	0	3
2012-01-05	2012	1947-06-15	1	64.56	2	2	1489	0	0	#NULL!	2013-12-31	1.99	0	#NULL!	1	0	0	0	0	1	1	1	0	0	0	0	#NULL!
2009-07-09	2009	1944-12-15	0	64.56	1	3	1431	1	1	2012-04-10	2012-04-10	2.75	0	#NULL!	0	0	0	0	0	0	1	0	0	0	0	1	3
2002-06-07	2002	1937-11-15	1	64.56	1	1	1479	0	1	2003-08-01	2003-08-01	1.15	0	#NULL!	1	0	0	0	0	0	0	0	0	0	0	0	1
2002-11-05	2002	1938-04-15	1	64.56	1	2	1479	0	1	2007-05-30	2007-05-30	4.56	0	#NULL!	1	0	0	0	0	0	0	0	0	0	0	0	5
2006-06-05	2006	1941-11-15	1	64.55	3	2	1460	0	1	2007-09-15	2007-09-15	1.28	0	#NULL!	0	0	0	0	0	0	1	0	0	0	0	0	1
2005-11-01	2005	1941-04-15	1	64.55	2	2	1450	1	1	2006-09-06	2006-09-06	0.85	0	#NULL!	1	0	0	0	0	0	0	0	0	0	0	0	1
2010-07-05	2010	1945-12-15	0	64.55	2	1	1450	1	0	#NULL!	2013-12-31	3.49	0	#NULL!	0	0	0	0	0	0	1	0	0	0	0	0	#NULL!
2010-02-01	2010	1945-07-15	0	64.55	2	2	1450	1	0	#NULL!	2013-12-31	3.91	0	#NULL!	1	0	0	0	0	1	0	0	0	0	0	0	#NULL!
2012-07-04	2012	1947-12-15	1	64.55	2	2	1456	1	1	2013-12-06	2013-12-06	1.42	0	#NULL!	1	0	0	0	0	1	0	0	0	0	0	0	1
2002-09-04	2002	1938-02-15	1	64.55	1	1	149	0	1	2003-03-07	2003-03-07	0.5	0	#NULL!	1	0	0	0	0	1	1	0	0	0	0	0	1
2007-04-30	2007	1942-10-15	1	64.54	4	2	1450	1	0	#NULL!	2013-12-31	6.67	0	#NULL!	1	0	0	0	0	1	0	0	0	0	0	0	#NULL!
2001-09-30	2001	1937-03-15	1	64.54	3	2	1459	1	1	2003-05-17	2003-05-17	1.63	0	#NULL!	1	0	0	0	0	0	0	0	0	0	0	1	2
2011-05-02	2011	1946-10-15	1	64.54	3	2	1611	0	0	#NULL!	2013-02-25	1.82	0	#NULL!	1	0	0	0	0	0	0	0	0	0	0	0	#NULL!
2002-09-02	2002	1938-02-15	1	64.54	3	2	1489	0	1	2003-07-26	2003-07-26	0.9	0	#NULL!	0	0	0	0	0	0	0	0	0	0	0	0	1
2002-01-29	2002	1937-07-15	1	64.54	2	1	1610	0	1	2003-03-10	2003-03-10	1.11	0	#NULL!	0	0	0	0	0	0	1	0	1	0	0	0	1
2010-07-01	2010	1945-12-15	1	64.54	1	1	1450	1	1	2011-03-29	2011-03-29	0.74	0	#NULL!	0	0	0	0	0	0	1	0	0	0	0	0	1
2001-02-26	2001	1936-08-15	1	64.53	4	1	1489	0	1	2001-07-07	2001-07-07	0.36	0	#NULL!	0	0	0	0	0	0	0	0	0	0	0	1	0
2011-10-27	2011	1947-04-15	1	64.53	3	2	1419	1	0	#NULL!	2013-12-31	2.18	0	#NULL!	1	0	0	0	0	0	1	0	0	0	0	0	#NULL!
2005-11-24	2005	1941-05-15	1	64.53	2	2	1479	0	1	2006-10-01	2006-10-01	0.85	0	#NULL!	1	0	0	0	0	0	0	0	0	0	0	0	1
2010-11-23	2010	1946-05-15	1	64.53	1	2	1479	0	0	#NULL!	2013-12-31	3.1	0	#NULL!	1	0	0	0	0	0	0	0	0	0	0	0	#NULL!
2008-06-24	2008	1943-12-15	1	64.53	1	1	1419	1	1	2009-05-27	2009-05-27	0.92	1	2008-07-04	1	1	0	0	0	0	1	1	1	1	0	0	1
2008-10-27	2008	1944-04-15	1	64.53	1	1	1469	0	0	#NULL!	2013-12-31	5.18	0	#NULL!	1	1	0	0	0	0	1	1	0	0	0	0	#NULL!
2004-08-24	2004	1940-02-15	1	64.52	4	1	1610	0	1	2011-07-21	2011-07-21	6.9	0	#NULL!	1	0	0	0	0	0	0	0	0	0	0	1	7
2002-11-22	2002	1938-05-15	0	64.52	3	2	1479	0	1	2004-12-25	2004-12-25	2.09	0	#NULL!	0	1	0	0	0	1	1	0	0	0	0	0	2
2011-05-24	2011	1946-11-15	1	64.52	2	1	1412	1	0	#NULL!	2013-12-31	2.61	0	#NULL!	0	0	0	0	0	1	1	1	1	0	0	1	#NULL!
2008-01-22	2008	1943-07-15	1	64.52	2	1	1479	0	1	2010-10-12	2010-10-12	2.72	0	#NULL!	0	0	0	0	0	0	0	0	0	0	0	0	3
2003-06-23	2003	1938-12-15	1	64.52	2	2	1419	1	1	2004-09-26	2004-09-26	1.26	0	#NULL!	1	0	0	1	0	1	1	0	0	0	0	0	1
2011-03-23	2011	1946-09-15	1	64.52	1	3	1453	1	1	2011-11-14	2011-11-14	0.65	0	#NULL!	1	1	0	0	0	1	1	1	1	0	0	0	1
2009-07-20	2009	1945-01-15	1	64.51	3	1	1469	0	0	#NULL!	2013-12-31	4.45	0	#NULL!	1	0	0	0	0	1	1	1	1	0	0	0	#NULL!
2001-11-19	2001	1937-05-15	1	64.51	2	1	1458	1	1	2002-06-28	2002-06-28	0.61	0	#NULL!	0	0	0	0	0	0	0	0	0	0	0	0	1
2006-07-20	2006	1942-01-15	1	64.51	2	2	1460	0	1	2009-10-17	2009-10-17	3.24	0	#NULL!	1	1	0	0	0	0	1	0	1	0	0	0	3
2006-07-20	2006	1942-01-15	1	64.51	1	3	1479	0	1	2009-04-21	2009-04-21	2.75	0	#NULL!	1	1	0	0	0	0	1	1	1	0	0	0	3
2010-05-17	2010	1945-11-15	1	64.5	1	2	1419	1	0	#NULL!	2013-12-31	3.62	0	#NULL!	0	0	0	0	0	0	0	1	0	0	0	0	#NULL!
2012-08-17	2012	1948-02-15	1	64.5	1	1	1498	0	0	#NULL!	2013-12-31	1.37	0	#NULL!	0	0	0	0	0	0	0	1	0	0	0	0	#NULL!
2004-03-17	2004	1939-09-15	0	64.5	1	2	1479	0	1	2004-09-30	2004-09-30	0.54	1	2004-03-30	0	1	0	0	0	0	0	0	0	1	0	0	1
2009-11-11	2009	1945-05-15	1	64.49	4	2	1460	0	0	#NULL!	2013-12-31	4.14	0	#NULL!	0	0	0	0	1	1	1	0	0	0	0	0	#NULL!
2003-02-10	2003	1938-08-15	0	64.49	3	2	1479	0	0	#NULL!	2013-12-31	10.89	1	2008-10-30	1	0	0	0	0	0	0	0	0	0	0	0	#NULL!
2003-03-13	2003	1938-09-15	1	64.49	2	2	1419	1	1	2004-01-10	2004-01-10	0.83	0	#NULL!	0	0	0	0	0	0	1	0	0	0	0	0	1
2006-04-11	2006	1941-10-15	1	64.49	2	2	1419	1	1	2006-09-15	2006-09-15	0.43	0	#NULL!	1	0	0	0	0	1	1	0	1	0	0	1	0
2000-09-11	2000	1936-03-15	1	64.49	1	1	1489	0	1	2001-01-12	2001-01-12	0.34	0	#NULL!	0	0	0	0	0	0	0	0	0	0	0	0	0
2009-07-08	2009	1945-01-15	1	64.48	3	1	1619	0	1	2011-01-14	2011-01-14	1.52	0	#NULL!	1	0	0	0	0	0	1	0	0	0	0	0	2
2004-11-08	2004	1940-05-15	1	64.48	3	2	1419	1	1	2005-07-10	2005-07-10	0.67	0	#NULL!	1	0	0	0	0	0	0	0	0	0	0	0	1
2005-03-08	2005	1940-09-15	1	64.48	2	2	1455	1	1	2007-04-04	2007-04-04	2.07	0	#NULL!	0	0	0	0	0	0	0	0	0	0	0	0	2
2003-08-11	2003	1939-02-15	1	64.48	2	1	161	0	1	2004-08-11	2004-08-11	1	0	#NULL!	0	0	0	0	0	0	0	0	0	0	0	0	1
2002-06-07	2002	1937-12-15	1	64.48	1	2	146	0	1	2004-05-10	2004-05-10	1.92	0	#NULL!	0	0	0	0	0	1	0	1	0	0	0	0	2
2005-08-09	2005	1941-02-15	1	64.48	1	3	1460	0	1	2007-12-09	2007-12-09	2.33	0	#NULL!	1	0	0	1	0	0	1	1	0	1	0	0	2
2011-03-08	2011	1946-09-15	1	64.48	1	2	1430	1	0	#NULL!	2013-12-31	2.82	0	#NULL!	0	0	0	0	0	1	1	1	1	0	0	0	#NULL!
2011-11-07	2011	1947-05-15	1	64.48	1	1	1459	1	1	2013-07-27	2013-07-27	1.72	0	#NULL!	1	0	0	0	0	0	1	0	1	0	0	1	2
2003-07-10	2003	1939-01-15	1	64.48	1	2	1419	1	1	2005-07-18	2005-07-18	2.02	0	#NULL!	1	0	0	0	0	0	0	0	1	0	0	0	2
2006-07-09	2006	1942-01-15	0	64.48	1	3	1416	1	0	#NULL!	2013-12-31	7.48	0	#NULL!	1	0	0	0	0	0	1	0	0	0	0	0	#NULL!
2009-10-05	2009	1945-04-15	1	64.47	3	2	1479	0	1	2012-05-11	2012-05-11	2.6	0	#NULL!	0	0	0	0	0	0	0	0	0	0	0	0	3
2007-08-06	2007	1943-02-15	0	64.47	3	1	1450	1	0	#NULL!	2013-12-31	6.4	0	#NULL!	0	1	0	0	0	1	1	1	0	0	0	0	#NULL!
2008-03-04	2008	1943-09-15	1	64.47	2	3	1450	1	1	2013-07-25	2013-07-25	5.39	0	#NULL!	1	0	0	0	0	0	1	0	0	0	0	0	5
2000-10-05	2000	1936-04-15	1	64.47	2	1	1489	0	1	2004-07-07	2004-07-07	3.75	0	#NULL!	1	0	0	0	0	0	0	0	0	0	0	0	4
2008-03-03	2008	1943-09-15	1	64.47	1	2	1410	1	1	2008-12-28	2008-12-28	0.82	0	#NULL!	1	0	0	0	0	1	1	1	1	0	0	0	1
2011-03-07	2011	1946-09-15	1	64.47	1	2	1489	0	1	2012-06-13	2012-06-13	1.27	0	#NULL!	1	0	0	0	0	0	1	0	0	0	0	0	1
2010-11-01	2010	1946-05-15	1	64.47	1	3	1419	1	0	#NULL!	2013-12-31	3.16	0	#NULL!	0	0	0	0	0	0	0	0	0	0	0	0	#NULL!
2011-11-01	2011	1947-05-15	1	64.47	1	2	1419	1	1	2012-01-27	2012-01-27	0.24	0	#NULL!	1	0	0	0	0	1	1	1	0	0	0	0	0
2012-05-01	2012	1947-11-15	1	64.46	4	1	1479	0	0	#NULL!	2013-12-31	1.67	0	#NULL!	1	0	0	0	0	1	1	0	0	0	0	0	#NULL!
2009-06-02	2009	1944-12-15	1	64.46	3	3	1419	1	1	2010-01-08	2010-01-08	0.6	0	#NULL!	1	0	0	0	0	1	0	0	0	0	0	0	1
2008-05-01	2008	1943-11-15	1	64.46	2	1	1489	0	0	#NULL!	2013-12-31	5.67	0	#NULL!	1	0	0	0	0	0	0	0	0	0	0	0	#NULL!
2009-07-01	2009	1945-01-15	1	64.46	1	1	1490	0	1	2010-07-21	2010-07-21	1.05	0	#NULL!	1	0	0	0	0	0	0	0	0	0	0	0	1
2012-01-30	2012	1947-08-15	0	64.46	1	1	1479	0	0	#NULL!	2013-12-31	1.92	0	#NULL!	0	0	0	0	0	0	1	1	1	1	0	0	#NULL!
2005-09-29	2005	1941-04-15	1	64.46	1	2	1479	0	0	#NULL!	2013-12-31	8.25	0	#NULL!	1	0	0	0	0	0	0	0	0	0	0	0	#NULL!
2002-08-01	2002	1938-02-15	0	64.46	1	1	1420	1	1	2004-02-02	2004-02-02	1.51	0	#NULL!	1	1	0	0	0	1	1	1	0	0	0	0	2
2007-11-28	2007	1943-06-15	1	64.45	4	1	1410	1	1	2012-01-24	2012-01-24	4.16	0	#NULL!	1	0	0	0	0	1	1	1	0	0	0	0	4
2003-10-27	2003	1939-05-15	1	64.45	3	1	1439	1	1	2004-06-09	2004-06-09	0.62	0	#NULL!	1	0	0	0	0	0	0	0	0	0	0	0	1
2004-10-26	2004	1940-05-15	1	64.45	2	2	1460	0	0	#NULL!	2013-12-31	9.18	0	#NULL!	1	0	0	0	0	0	1	0	0	0	0	0	#NULL!
2012-04-26	2012	1947-11-15	1	64.45	1	3	1619	0	0	#NULL!	2013-12-31	1.68	0	#NULL!	0	0	0	0	0	1	1	1	0	0	0	0	#NULL!
2009-08-25	2009	1945-03-15	1	64.45	1	1	1489	0	0	#NULL!	2013-12-31	4.35	0	#NULL!	1	0	0	0	0	0	1	0	0	0	0	0	#NULL!
2008-08-25	2008	1944-03-15	0	64.45	1	2	1479	0	0	#NULL!	2013-12-31	5.35	1	2011-06-21	1	0	0	0	0	0	0	1	0	1	0	0	#NULL!
2010-04-23	2010	1945-11-15	1	64.44	3	2	1479	0	1	2010-08-26	2010-08-26	0.34	0	#NULL!	0	1	0	0	0	0	0	0	0	0	0	0	0
2002-10-21	2002	1938-05-15	1	64.44	3	3	1479	0	1	2003-01-20	2003-01-20	0.25	0	#NULL!	1	0	0	0	0	0	1	1	1	0	0	0	0
2009-11-24	2009	1945-06-15	1	64.44	3	3	1479	0	0	#NULL!	2013-12-31	4.1	0	#NULL!	1	1	0	0	0	1	1	1	1	0	0	0	#NULL!
2011-03-25	2011	1946-10-15	1	64.44	3	2	1440	1	1	2011-07-05	2011-07-05	0.28	0	#NULL!	0	0	0	0	0	1	1	0	0	0	0	0	0
2000-02-21	2000	1935-09-15	0	64.44	2	2	1479	0	1	2000-11-24	2000-11-24	0.76	0	#NULL!	1	0	0	0	0	0	1	0	0	0	0	0	1
2001-07-27	2001	1937-02-15	1	64.44	2	2	1450	1	1	2013-08-11	2013-08-11	12.04	0	#NULL!	0	0	0	0	0	0	0	0	0	0	0	0	12
2009-07-27	2009	1945-02-15	1	64.44	1	1	1419	1	1	2010-11-24	2010-11-24	1.33	0	#NULL!	1	0	0	0	0	0	0	0	0	0	0	1	1
2004-11-24	2004	1940-06-15	1	64.44	1	1	1469	0	1	2006-02-12	2006-02-12	1.22	0	#NULL!	1	1	0	0	0	0	1	0	1	0	0	0	1
2004-09-20	2004	1940-04-15	1	64.43	3	2	1459	1	1	2008-08-07	2008-08-07	3.88	0	#NULL!	1	0	0	0	0	0	1	0	0	0	0	0	4
2005-04-20	2005	1940-11-15	1	64.43	2	1	1459	1	1	2006-03-26	2006-03-26	0.93	0	#NULL!	1	0	0	0	0	0	0	0	0	0	0	0	1
2011-03-22	2011	1946-10-15	0	64.43	2	2	1479	0	0	#NULL!	2013-12-31	2.78	0	#NULL!	1	0	0	0	0	0	0	0	0	0	0	0	#NULL!
2006-06-21	2006	1942-01-15	1	64.43	2	2	1450	1	1	2010-04-26	2010-04-26	3.85	0	#NULL!	1	0	0	0	0	1	0	1	1	0	0	0	4
2006-06-20	2006	1942-01-15	0	64.43	2	1	1611	0	1	2007-05-06	2007-05-06	0.88	0	#NULL!	0	1	0	0	0	0	1	0	0	0	0	0	1
2012-12-19	2012	1948-07-15	1	64.43	1	1	1419	1	1	2013-07-02	2013-07-02	0.53	0	#NULL!	1	0	0	0	0	1	1	1	0	0	0	1	1
2009-01-15	2009	1944-08-15	1	64.42	3	1	1459	1	1	2009-09-03	2009-09-03	0.63	0	#NULL!	0	0	0	0	0	0	0	0	0	0	0	0	1
2010-08-16	2010	1946-03-15	1	64.42	3	2	1450	1	1	2012-01-05	2012-01-05	1.39	0	#NULL!	0	1	0	0	0	0	0	0	0	0	0	0	1
2007-01-15	2007	1942-08-15	1	64.42	3	2	1619	0	0	#NULL!	2010-05-17	3.33	0	#NULL!	1	0	0	0	0	0	0	0	0	0	0	0	#NULL!
2003-03-17	2003	1938-10-15	0	64.42	2	1	1479	0	1	2004-04-20	2004-04-20	1.1	0	#NULL!	0	0	0	0	0	0	1	0	0	0	0	0	1
2006-08-15	2006	1942-03-15	1	64.42	1	2	1410	1	1	2009-01-12	2009-01-12	2.41	0	#NULL!	0	0	0	0	0	1	1	0	0	0	0	0	2
2006-11-17	2006	1942-06-15	1	64.42	1	3	1481	0	1	2007-02-04	2007-02-04	0.22	0	#NULL!	1	0	0	0	0	0	1	1	1	0	0	0	0
2002-05-14	2002	1937-12-15	1	64.41	3	1	1450	1	1	2012-11-28	2012-11-28	10.54	0	#NULL!	0	0	0	0	0	0	1	0	0	0	0	0	11
2011-10-11	2011	1947-05-15	1	64.41	3	2	1450	1	0	#NULL!	2013-12-31	2.22	0	#NULL!	1	0	0	0	0	1	1	1	0	0	0	0	#NULL!
2011-12-12	2011	1947-07-15	1	64.41	3	2	1450	1	0	#NULL!	2013-12-31	2.05	1	2012-05-15	1	0	0	0	0	0	0	0	0	0	0	0	#NULL!
2008-12-10	2008	1944-07-15	1	64.41	3	1	1429	1	0	#NULL!	2013-12-31	5.06	0	#NULL!	1	0	0	0	0	0	0	0	0	0	0	1	#NULL!
2005-08-12	2005	1941-03-15	1	64.41	2	2	1448	1	1	2007-08-22	2007-08-22	2.03	0	#NULL!	1	0	0	0	0	0	1	0	0	0	0	0	2
2003-07-16	2003	1939-02-15	0	64.41	2	2	1479	0	0	#NULL!	2013-12-31	10.46	0	#NULL!	1	1	0	0	0	0	0	1	0	0	0	0	#NULL!
2009-02-12	2009	1944-09-15	1	64.41	2	2	1419	1	0	#NULL!	2013-12-31	4.88	0	#NULL!	0	0	0	0	0	1	1	0	0	0	0	0	#NULL!
2012-11-12	2012	1948-06-15	1	64.41	2	3	1439	1	0	#NULL!	2013-12-31	1.13	0	#NULL!	1	0	0	0	0	0	1	1	0	0	0	0	#NULL!
2009-08-12	2009	1945-03-15	0	64.41	1	2	1479	0	1	2010-06-30	2010-06-30	0.88	0	#NULL!	1	0	0	0	1	0	0	0	0	0	0	0	1
2000-01-10	2000	1935-08-15	1	64.41	1	3	1619	0	0	#NULL!	2013-12-31	13.97	0	#NULL!	0	0	0	0	0	0	0	0	0	0	0	0	#NULL!
2007-09-11	2007	1943-04-15	1	64.41	1	1	1459	1	1	2008-05-26	2008-05-26	0.71	0	#NULL!	1	0	0	0	0	0	0	0	0	0	0	0	1
2011-04-15	2011	1946-11-15	1	64.41	1	1	1479	0	1	2012-08-03	2012-08-03	1.3	0	#NULL!	1	0	0	0	0	1	0	0	0	0	0	0	1
2001-09-13	2001	1937-04-15	1	64.41	1	2	1619	0	1	2003-10-11	2003-10-11	2.08	0	#NULL!	1	0	0	0	0	0	1	0	1	0	0	0	2
2005-01-13	2005	1940-08-15	1	64.41	1	1	1453	1	1	2005-04-19	2005-04-19	0.26	0	#NULL!	0	1	0	0	0	0	0	1	0	0	0	0	0
2008-11-09	2008	1944-06-15	1	64.4	4	1	1489	0	1	2010-06-16	2010-06-16	1.6	0	#NULL!	1	0	0	0	0	0	0	0	0	0	0	0	2
2007-11-09	2007	1943-06-15	1	64.4	3	2	1455	1	1	2011-05-25	2011-05-25	3.54	0	#NULL!	1	0	0	0	0	1	1	1	1	0	0	0	4
2008-01-08	2008	1943-08-15	0	64.4	2	2	1469	0	0	#NULL!	2013-12-31	5.98	0	#NULL!	1	0	0	0	0	0	0	0	0	0	0	0	#NULL!
2004-03-09	2004	1939-10-15	1	64.4	1	1	1479	0	1	2007-10-06	2007-10-06	3.58	0	#NULL!	0	0	0	0	0	0	1	0	0	0	0	0	4
2002-01-09	2002	1937-08-15	0	64.4	1	2	1479	0	0	#NULL!	2013-12-31	11.98	0	#NULL!	1	0	0	0	0	0	0	0	0	0	0	0	#NULL!
2008-07-06	2008	1944-02-15	1	64.39	4	1	1481	0	1	2008-09-20	2008-09-20	0.21	0	#NULL!	1	1	0	0	0	1	1	1	0	0	0	0	0
2001-05-07	2001	1936-12-15	1	64.39	3	3	1419	1	1	2006-11-02	2006-11-02	5.49	0	#NULL!	1	0	0	0	0	1	0	0	0	0	0	0	5
2012-09-04	2012	1948-04-15	1	64.39	3	1	1481	0	1	2013-02-12	2013-02-12	0.44	0	#NULL!	1	0	0	0	0	1	1	1	1	0	0	0	0
2004-11-04	2004	1940-06-15	0	64.39	3	1	1470	0	0	#NULL!	2013-12-31	9.16	0	#NULL!	1	0	0	0	0	0	1	0	0	0	0	0	#NULL!
2012-12-04	2012	1948-07-15	1	64.39	2	2	1459	1	0	#NULL!	2013-12-31	1.07	0	#NULL!	1	1	0	0	0	0	1	0	0	0	0	0	#NULL!
2007-06-08	2007	1943-01-15	1	64.39	1	3	1610	0	1	2008-10-02	2008-10-02	1.32	0	#NULL!	1	0	0	0	0	0	0	0	0	0	0	1	1
2007-04-06	2007	1942-11-15	1	64.39	1	1	1479	0	1	2007-06-28	2007-06-28	0.23	0	#NULL!	1	0	0	0	0	1	1	0	0	0	0	0	0
2005-03-07	2005	1940-10-15	1	64.39	1	2	161	0	0	#NULL!	2013-12-31	8.82	0	#NULL!	1	0	0	0	0	0	1	1	0	0	0	0	#NULL!
2009-12-01	2009	1945-07-15	1	64.38	4	1	1419	1	1	2010-11-14	2010-11-14	0.95	0	#NULL!	1	0	0	0	0	0	0	0	0	0	0	0	1
2012-08-01	2012	1948-03-15	1	64.38	3	3	1479	0	0	#NULL!	2013-12-31	1.42	0	#NULL!	1	0	0	0	0	0	0	0	0	0	0	0	#NULL!
2009-11-30	2009	1945-07-15	1	64.38	3	2	1450	1	0	#NULL!	2013-12-31	4.08	0	#NULL!	0	0	0	0	0	1	1	0	1	0	0	0	#NULL!
2002-04-01	2002	1937-11-15	1	64.38	3	1	1479	0	1	2007-04-07	2007-04-07	5.02	0	#NULL!	0	0	0	0	0	0	0	0	0	0	0	0	5
2002-10-30	2002	1938-06-15	1	64.38	3	1	1479	0	1	2007-09-29	2007-09-29	4.91	0	#NULL!	0	0	0	0	0	0	1	1	0	0	0	0	5
2007-11-01	2007	1943-06-15	1	64.38	2	2	1401	1	1	2008-06-14	2008-06-14	0.62	0	#NULL!	1	1	0	0	0	1	0	0	0	0	0	0	1
2006-05-01	2006	1941-12-15	1	64.38	2	2	1459	1	1	2009-06-23	2009-06-23	3.15	0	#NULL!	1	0	0	0	0	0	0	0	0	0	0	0	3
2008-09-01	2008	1944-04-15	1	64.38	2	2	1489	0	0	#NULL!	2013-12-31	5.33	0	#NULL!	1	0	0	0	0	0	0	0	0	0	0	0	#NULL!
2007-05-01	2007	1942-12-15	1	64.38	2	2	1450	1	1	2009-10-07	2009-10-07	2.44	0	#NULL!	0	0	0	0	0	0	1	0	0	0	0	0	2
2009-03-02	2009	1944-10-15	1	64.38	1	3	1452	1	0	#NULL!	2013-12-31	4.83	0	#NULL!	1	0	0	0	0	0	1	0	0	0	0	0	#NULL!
2010-11-26	2010	1946-07-15	1	64.37	3	1	1449	1	0	#NULL!	2011-04-27	0.42	0	#NULL!	1	0	0	1	0	1	1	0	1	0	0	0	#NULL!
2011-08-29	2011	1947-04-15	1	64.37	1	3	1449	1	0	#NULL!	2013-12-31	2.34	0	#NULL!	1	0	0	0	0	0	0	0	0	0	0	0	#NULL!
2005-10-27	2005	1941-06-15	0	64.37	1	2	1489	0	1	2012-03-08	2012-03-08	6.36	0	#NULL!	0	1	0	0	0	0	0	0	0	0	0	0	6
2013-07-01	2013	1949-02-15	0	64.37	1	3	1619	0	0	#NULL!	2013-12-31	0.5	0	#NULL!	0	0	0	0	0	1	1	1	0	0	0	1	#NULL!
2009-09-28	2009	1945-05-15	1	64.37	1	2	1459	1	0	#NULL!	2013-12-31	4.26	0	#NULL!	1	0	0	0	0	0	1	1	0	0	0	0	#NULL!
2008-05-26	2008	1944-01-15	1	64.36	3	1	1479	0	0	#NULL!	2013-12-31	5.6	0	#NULL!	1	0	0	0	0	0	0	0	0	0	0	0	#NULL!
2007-03-27	2007	1942-11-15	1	64.36	2	1	1412	1	1	2009-03-24	2009-03-24	1.99	0	#NULL!	1	0	0	0	0	0	1	0	0	0	0	0	2
2009-05-25	2009	1945-01-15	0	64.36	2	2	1409	1	0	#NULL!	2013-12-31	4.6	0	#NULL!	0	0	0	0	0	1	1	1	0	0	0	0	#NULL!
2000-05-25	2000	1936-01-15	1	64.36	2	1	1449	1	1	2000-10-19	2000-10-19	0.4	0	#NULL!	0	0	0	0	0	0	0	0	0	0	0	0	0
2013-01-23	2013	1948-09-15	1	64.36	2	1	1450	1	1	2013-07-02	2013-07-02	0.44	0	#NULL!	1	0	0	0	0	0	0	0	0	0	0	0	0
2002-05-28	2002	1938-01-15	1	64.36	2	3	1479	0	1	2013-09-17	2013-09-17	11.31	1	2010-10-13	1	1	0	0	0	0	0	0	0	0	0	0	11
2008-06-24	2008	1944-02-15	1	64.36	1	3	1440	1	1	2012-07-24	2012-07-24	4.08	0	#NULL!	1	0	0	0	0	0	1	0	0	0	0	0	4
2012-06-24	2012	1948-02-15	1	64.36	1	1	1479	0	0	#NULL!	2013-12-31	1.52	0	#NULL!	1	0	0	0	0	1	0	0	0	0	0	0	#NULL!
2007-10-24	2007	1943-06-15	1	64.36	1	3	1439	1	0	#NULL!	2013-12-31	6.19	0	#NULL!	1	0	0	0	0	1	0	0	0	0	0	1	#NULL!
2012-07-20	2012	1948-03-15	1	64.35	4	3	1460	0	0	#NULL!	2013-12-31	1.45	0	#NULL!	1	0	0	0	0	1	1	0	0	0	0	0	#NULL!
2008-01-22	2008	1943-09-15	1	64.35	2	1	1479	0	0	#NULL!	2013-12-31	5.94	0	#NULL!	1	0	0	0	0	0	0	1	0	0	0	0	#NULL!
2012-02-21	2012	1947-10-15	1	64.35	2	2	1419	1	0	#NULL!	2013-12-31	1.86	0	#NULL!	1	0	0	0	0	1	0	1	0	0	0	0	#NULL!
2007-04-23	2007	1942-12-15	0	64.35	1	2	1479	0	0	#NULL!	2013-12-31	6.69	0	#NULL!	0	0	0	0	0	0	0	1	0	0	0	0	#NULL!
2007-09-21	2007	1943-05-15	1	64.35	1	3	1419	1	1	2009-06-24	2009-06-24	1.76	0	#NULL!	0	0	0	0	0	1	1	1	1	0	0	0	2
2011-01-22	2011	1946-09-15	1	64.35	1	2	1439	1	1	2013-08-17	2013-08-17	2.57	0	#NULL!	1	1	0	0	0	1	1	1	1	0	0	0	3
2006-08-22	2006	1942-04-15	1	64.35	1	1	1619	0	1	2010-09-07	2010-09-07	4.04	0	#NULL!	0	1	0	1	0	1	1	1	1	0	1	0	4
2007-06-20	2007	1943-02-15	1	64.34	3	1	1479	0	0	#NULL!	2013-12-31	6.53	0	#NULL!	1	0	0	0	0	0	0	0	0	0	0	0	#NULL!
2012-01-19	2012	1947-09-15	1	64.34	2	1	1489	0	0	#NULL!	2013-12-31	1.95	0	#NULL!	1	0	0	0	0	0	1	0	0	0	0	0	#NULL!
2006-03-21	2006	1941-11-15	1	64.34	2	3	1459	1	1	2006-08-28	2006-08-28	0.44	0	#NULL!	1	0	0	0	0	0	0	0	0	0	0	0	0
2012-03-19	2012	1947-11-15	1	64.34	1	2	1459	1	1	2013-06-12	2013-06-12	1.23	0	#NULL!	1	0	0	0	0	0	0	0	0	0	0	0	1
2004-10-18	2004	1940-06-15	1	64.34	1	2	1459	1	0	#NULL!	2013-12-31	9.2	1	2005-02-16	0	0	0	0	0	0	0	1	0	0	0	0	#NULL!
2007-08-16	2007	1943-04-15	1	64.34	1	1	1489	0	0	#NULL!	2013-12-31	6.38	0	#NULL!	1	0	0	0	0	0	1	0	0	0	0	0	#NULL!
2010-12-15	2010	1946-08-15	1	64.33	3	1	1452	1	1	2011-11-10	2011-11-10	0.9	0	#NULL!	1	0	0	0	0	1	0	0	0	0	0	0	1
2011-05-14	2011	1947-01-15	1	64.33	2	3	1430	1	1	2012-04-28	2012-04-28	0.96	0	#NULL!	1	0	0	0	0	1	0	0	0	0	0	0	1
2007-02-14	2007	1942-10-15	1	64.33	2	1	1489	0	1	2007-05-25	2007-05-25	0.27	0	#NULL!	1	0	0	0	0	0	0	0	0	0	0	0	0
2003-04-15	2003	1938-12-15	1	64.33	2	2	1619	0	1	2005-09-24	2005-09-24	2.44	1	2003-04-18	1	0	0	0	0	0	0	0	0	1	0	0	2
2001-02-13	2001	1936-10-15	1	64.33	1	3	149	0	0	#NULL!	2013-12-31	12.88	0	#NULL!	1	0	0	0	0	0	0	0	0	0	0	0	#NULL!
2008-11-12	2008	1944-07-15	1	64.33	1	2	1479	0	1	2010-07-04	2010-07-04	1.64	1	2010-03-03	1	0	0	0	0	0	1	0	0	0	0	0	2
2009-05-13	2009	1945-01-15	0	64.32	4	2	1479	0	0	#NULL!	2013-12-31	4.64	0	#NULL!	1	0	0	0	0	0	1	0	0	0	0	0	#NULL!
2006-05-12	2006	1942-01-15	1	64.32	3	3	1489	0	1	2006-09-02	2006-09-02	0.31	0	#NULL!	0	1	0	0	0	0	1	0	0	0	0	0	0
2009-12-11	2009	1945-08-15	1	64.32	3	1	1449	1	1	2010-07-23	2010-07-23	0.61	0	#NULL!	1	0	0	0	0	0	0	1	0	0	0	0	1
2010-05-13	2010	1946-01-15	1	64.32	3	1	1489	0	1	2011-08-21	2011-08-21	1.27	0	#NULL!	1	0	0	0	0	1	1	0	0	0	0	0	1
2003-08-11	2003	1939-04-15	1	64.32	2	2	1619	0	1	2004-12-11	2004-12-11	1.34	0	#NULL!	0	0	0	0	0	1	1	0	1	0	0	0	1
2003-06-11	2003	1939-02-15	1	64.32	2	2	1479	0	1	2004-04-10	2004-04-10	0.83	0	#NULL!	0	0	0	0	0	0	1	0	0	0	0	0	1
2009-07-10	2009	1945-03-15	1	64.32	2	3	1489	0	1	2010-02-25	2010-02-25	0.63	0	#NULL!	1	0	0	0	0	0	0	1	1	0	0	0	1
2013-04-11	2013	1948-12-15	1	64.32	2	2	1413	1	0	#NULL!	2013-12-31	0.72	0	#NULL!	1	0	0	0	0	1	1	1	1	0	0	1	#NULL!
2012-08-09	2012	1948-04-15	1	64.32	2	2	1419	1	1	2013-04-01	2013-04-01	0.64	0	#NULL!	1	0	0	0	0	0	1	0	1	0	0	0	1
2008-04-09	2008	1943-12-15	1	64.32	1	1	1460	0	1	2008-11-23	2008-11-23	0.62	0	#NULL!	1	0	0	0	0	0	0	0	0	0	0	0	1
2004-07-07	2004	1940-03-15	1	64.31	3	2	1420	1	0	#NULL!	2013-12-31	9.48	0	#NULL!	0	0	0	0	0	0	0	0	0	0	0	1	#NULL!
2006-06-08	2006	1942-02-15	1	64.31	3	3	1479	0	0	#NULL!	2013-12-31	7.56	1	2007-11-10	0	0	0	0	0	0	0	0	0	1	0	0	#NULL!
2012-05-07	2012	1948-01-15	1	64.31	3	2	1450	1	0	#NULL!	2013-12-31	1.65	0	#NULL!	0	0	0	0	0	0	0	0	0	0	0	0	#NULL!
2012-03-07	2012	1947-11-15	1	64.31	3	1	1419	1	1	2012-07-29	2012-07-29	0.39	0	#NULL!	1	0	0	0	0	0	1	0	0	0	0	0	0
2009-11-05	2009	1945-07-15	1	64.31	3	2	1469	0	1	2010-07-03	2010-07-03	0.66	0	#NULL!	1	0	0	0	0	0	0	0	0	0	0	0	1
2005-04-08	2005	1940-12-15	1	64.31	2	3	1619	0	1	2007-01-14	2007-01-14	1.77	0	#NULL!	0	0	0	0	0	0	1	0	1	0	1	0	2
2011-04-06	2011	1946-12-15	1	64.31	2	1	1420	1	1	2013-04-29	2013-04-29	2.06	0	#NULL!	0	0	0	0	0	0	1	0	0	0	0	0	2
2012-02-06	2012	1947-10-15	1	64.31	2	1	1450	1	0	#NULL!	2013-12-31	1.9	0	#NULL!	0	0	0	0	0	0	0	0	0	0	0	0	#NULL!
2006-12-07	2006	1942-08-15	1	64.31	2	2	1479	0	1	2007-06-09	2007-06-09	0.5	1	2007-02-07	0	0	0	0	0	0	0	0	0	0	0	0	1
2005-12-08	2005	1941-08-15	1	64.31	2	2	1472	0	1	2006-04-23	2006-04-23	0.37	0	#NULL!	1	0	0	0	0	0	0	1	0	0	0	0	0
2011-09-06	2011	1947-05-15	1	64.31	1	2	1460	0	0	#NULL!	2013-12-31	2.32	0	#NULL!	0	0	0	0	0	0	1	0	0	0	0	0	#NULL!
2012-11-04	2012	1948-07-15	1	64.31	1	3	1450	1	1	2013-04-15	2013-04-15	0.44	1	2012-11-19	1	0	0	0	0	0	0	0	0	1	0	0	0
2002-08-05	2002	1938-04-15	1	64.31	1	1	1479	0	1	2005-08-10	2005-08-10	3.01	0	#NULL!	1	0	0	0	0	0	0	0	0	0	0	0	3
2010-08-06	2010	1946-04-15	1	64.31	1	1	1453	1	0	#NULL!	2013-12-31	3.4	0	#NULL!	1	0	0	0	0	0	0	1	0	0	0	0	#NULL!
2011-03-08	2011	1946-11-15	1	64.31	1	3	146	0	1	2011-10-28	2011-10-28	0.64	0	#NULL!	1	0	0	0	0	0	1	1	0	0	0	0	1
2009-02-05	2009	1944-10-15	1	64.31	1	3	1479	0	0	#NULL!	2013-12-31	4.9	0	#NULL!	1	1	0	0	0	0	0	0	0	0	0	0	#NULL!
2012-09-03	2012	1948-05-15	1	64.3	3	2	1469	0	0	#NULL!	2013-12-31	1.33	0	#NULL!	1	1	0	1	0	0	1	1	0	0	0	0	#NULL!
2009-11-03	2009	1945-07-15	1	64.3	3	2	1456	1	1	2010-07-07	2010-07-07	0.67	0	#NULL!	1	0	0	0	0	0	1	0	0	0	0	1	1
2008-12-01	2008	1944-08-15	1	64.3	3	2	1466	0	1	2009-10-14	2009-10-14	0.87	0	#NULL!	0	1	0	0	0	0	0	1	0	0	0	0	1
2010-12-01	2010	1946-08-15	1	64.3	2	3	1419	1	1	2013-03-15	2013-03-15	2.29	0	#NULL!	0	1	0	1	0	1	1	1	1	0	0	0	2
2013-01-04	2013	1948-09-15	1	64.3	2	3	1479	0	1	2013-07-14	2013-07-14	0.52	0	#NULL!	1	0	0	0	0	0	1	1	1	0	0	0	1
2010-05-03	2010	1946-01-15	1	64.3	1	2	1469	0	0	#NULL!	2013-12-31	3.66	0	#NULL!	1	1	0	1	0	0	1	1	0	1	0	0	#NULL!
2013-01-04	2013	1948-09-15	1	64.3	1	3	1439	1	0	#NULL!	2013-12-31	0.99	0	#NULL!	0	0	0	0	0	1	0	0	0	0	0	0	#NULL!
2004-03-03	2004	1939-11-15	1	64.3	1	1	1490	0	1	2007-11-26	2007-11-26	3.73	0	#NULL!	1	0	0	0	0	0	1	0	0	0	0	0	4
2005-04-04	2005	1940-12-15	1	64.3	1	1	1619	0	1	2009-12-25	2009-12-25	4.73	0	#NULL!	1	0	0	0	0	0	0	0	0	0	0	0	5
2002-01-03	2002	1937-09-15	1	64.3	1	1	1455	1	1	2002-12-07	2002-12-07	0.93	0	#NULL!	0	0	0	0	0	0	0	0	0	0	0	0	1
2012-09-03	2012	1948-05-15	1	64.3	1	1	1430	1	1	2013-05-07	2013-05-07	0.67	0	#NULL!	0	0	0	0	0	1	1	1	0	0	0	0	1
2002-06-06	2002	1938-02-15	1	64.3	1	2	1479	0	0	#NULL!	2013-12-31	11.57	0	#NULL!	0	0	0	0	0	0	0	0	0	0	0	0	#NULL!
2012-10-28	2012	1948-07-15	0	64.29	4	2	1479	0	0	#NULL!	2013-12-31	1.17	0	#NULL!	1	0	0	0	0	0	1	1	0	0	0	0	#NULL!
2005-04-01	2005	1940-12-15	1	64.29	3	3	1479	0	1	2006-01-06	2006-01-06	0.77	0	#NULL!	1	0	0	0	0	1	1	1	0	0	0	0	1
2012-05-31	2012	1948-02-15	1	64.29	3	1	1611	0	1	2013-12-21	2013-12-21	1.56	0	#NULL!	1	0	0	0	0	0	1	0	0	0	0	0	2
2009-04-01	2009	1944-12-15	1	64.29	3	2	1429	1	1	2010-01-17	2010-01-17	0.8	0	#NULL!	0	0	0	0	0	1	1	1	0	0	0	0	1
2005-05-30	2005	1941-02-15	1	64.28	4	3	1401	1	1	2005-12-31	2005-12-31	0.59	0	#NULL!	0	0	0	0	0	0	1	0	1	1	0	0	1
2006-12-25	2006	1942-09-15	1	64.28	3	1	1489	0	1	2011-08-23	2011-08-23	4.66	0	#NULL!	0	1	0	0	0	0	1	0	1	0	0	0	5
2008-05-28	2008	1944-02-15	0	64.28	1	1	1429	1	0	#NULL!	2013-12-31	5.59	0	#NULL!	0	0	0	0	0	0	0	1	0	0	0	0	#NULL!
2008-04-24	2008	1944-01-15	1	64.27	2	2	1489	0	1	2008-06-18	2008-06-18	0.15	0	#NULL!	0	1	0	0	0	0	1	1	0	0	0	0	0
2010-02-22	2010	1945-11-15	1	64.27	2	2	1456	1	0	#NULL!	2013-12-31	3.85	0	#NULL!	0	0	0	0	0	1	1	1	1	0	0	0	#NULL!
2006-10-23	2006	1942-07-15	1	64.27	2	2	1450	1	0	#NULL!	2013-12-31	7.19	0	#NULL!	0	0	0	0	0	1	0	1	0	0	0	0	#NULL!
2012-07-24	2012	1948-04-15	1	64.27	2	2	1489	0	0	#NULL!	2013-12-31	1.44	0	#NULL!	1	0	0	0	0	0	0	0	0	0	0	0	#NULL!
2003-02-21	2003	1938-11-15	0	64.27	2	2	1479	0	1	2005-03-29	2005-03-29	2.1	0	#NULL!	1	0	0	0	0	1	1	1	0	1	0	0	2
2010-09-23	2010	1946-06-15	1	64.27	1	2	1419	1	1	2011-06-16	2011-06-16	0.73	0	#NULL!	1	0	0	0	0	0	0	0	0	0	0	0	1
2002-12-23	2002	1938-09-15	0	64.27	1	1	1420	1	1	2003-12-22	2003-12-22	1	0	#NULL!	0	0	0	0	0	0	0	0	0	0	0	0	1
2010-09-20	2010	1946-06-15	1	64.27	1	3	1479	0	0	#NULL!	2013-12-31	3.28	0	#NULL!	1	1	0	0	0	0	1	0	0	0	0	0	#NULL!
2006-04-24	2006	1942-01-15	1	64.27	1	3	1479	0	0	#NULL!	2013-12-31	7.69	0	#NULL!	1	0	0	0	0	0	0	0	0	0	0	0	#NULL!
2009-02-19	2009	1944-11-15	1	64.26	4	3	1460	0	0	#NULL!	2013-12-31	4.86	0	#NULL!	1	1	0	0	0	0	1	1	1	0	0	0	#NULL!
2009-04-20	2009	1945-01-15	1	64.26	3	2	1431	1	0	#NULL!	2013-12-31	4.7	1	2009-04-28	1	0	0	0	0	0	1	0	0	1	0	0	#NULL!
2008-09-19	2008	1944-06-15	1	64.26	2	3	1489	0	0	#NULL!	2013-12-31	5.28	0	#NULL!	1	0	0	0	0	0	0	0	0	0	0	0	#NULL!
2007-06-18	2007	1943-03-15	1	64.26	2	2	1450	1	1	2010-05-25	2010-05-25	2.93	0	#NULL!	1	0	0	0	0	0	1	1	0	0	0	0	3
2010-08-18	2010	1946-05-15	0	64.26	2	2	1479	0	0	#NULL!	2013-12-31	3.37	0	#NULL!	1	0	0	0	0	1	1	1	1	0	0	0	#NULL!
2002-02-19	2002	1937-11-15	1	64.26	2	2	1479	0	1	2003-02-13	2003-02-13	0.98	0	#NULL!	1	0	0	0	0	0	0	0	0	0	0	0	1
2001-11-19	2001	1937-08-15	1	64.26	2	2	1479	0	1	2002-06-20	2002-06-20	0.58	0	#NULL!	1	0	0	0	0	0	0	0	0	0	0	0	1
2010-05-20	2010	1946-02-15	1	64.26	1	1	1481	0	0	#NULL!	2013-12-31	3.62	0	#NULL!	1	0	0	0	0	0	1	1	0	0	0	0	#NULL!
2012-03-19	2012	1947-12-15	1	64.26	1	3	1612	0	0	#NULL!	2013-12-31	1.79	0	#NULL!	0	1	0	1	0	1	1	0	1	0	0	0	#NULL!
2012-05-15	2012	1948-02-15	0	64.25	3	1	1611	0	0	#NULL!	2013-12-31	1.63	0	#NULL!	1	0	0	0	0	0	0	0	0	0	0	0	#NULL!
2003-04-17	2003	1939-01-15	1	64.25	3	2	1479	0	1	2005-03-28	2005-03-28	1.95	0	#NULL!	0	0	0	0	0	1	0	1	0	0	0	0	2
2001-11-14	2001	1937-08-15	0	64.25	3	1	1479	0	0	#NULL!	2013-12-31	12.13	0	#NULL!	0	0	0	0	0	1	1	0	0	0	0	0	#NULL!
2011-06-15	2011	1947-03-15	0	64.25	3	2	1489	0	0	#NULL!	2013-12-31	2.55	0	#NULL!	1	0	0	0	0	0	0	0	0	0	0	0	#NULL!
2012-01-13	2012	1947-10-15	1	64.25	2	1	1411	1	0	#NULL!	2013-12-31	1.97	0	#NULL!	0	0	0	0	0	1	1	1	0	0	0	1	#NULL!
2004-12-16	2004	1940-09-15	1	64.25	2	2	1430	1	1	2008-03-17	2008-03-17	3.25	0	#NULL!	0	0	0	0	0	0	0	0	0	0	0	0	3
2009-04-15	2009	1945-01-15	1	64.25	2	3	1469	0	0	#NULL!	2013-12-31	4.71	0	#NULL!	1	0	0	0	0	0	0	0	0	0	0	0	#NULL!
2007-02-13	2007	1942-11-15	1	64.25	1	2	1460	0	0	#NULL!	2013-12-31	6.88	0	#NULL!	1	0	0	0	0	1	1	0	0	0	0	0	#NULL!
2011-02-16	2011	1946-11-15	1	64.25	1	1	1419	1	0	#NULL!	2013-12-31	2.87	0	#NULL!	0	0	0	0	0	1	0	1	1	0	0	0	#NULL!
2012-10-11	2012	1948-07-15	1	64.24	3	2	1489	0	1	2013-06-05	2013-06-05	0.65	0	#NULL!	1	0	0	0	0	0	1	1	0	0	0	0	1
2003-03-14	2003	1938-12-15	1	64.24	3	1	1480	0	1	2003-12-19	2003-12-19	0.77	0	#NULL!	1	0	0	0	0	0	0	0	0	0	0	0	1
2007-04-12	2007	1943-01-15	0	64.24	3	2	1479	0	1	2008-06-25	2008-06-25	1.2	0	#NULL!	1	0	0	0	0	0	1	0	1	0	0	0	1
2006-04-11	2006	1942-01-15	1	64.24	3	1	1419	1	1	2010-12-02	2010-12-02	4.64	0	#NULL!	1	0	0	0	0	0	1	0	0	0	0	0	5
2009-05-14	2009	1945-02-15	1	64.24	2	2	1489	0	0	#NULL!	2013-12-31	4.63	0	#NULL!	1	0	0	0	0	0	0	1	0	0	0	0	#NULL!
2002-08-09	2002	1938-05-15	1	64.24	2	1	1489	0	1	2004-01-02	2004-01-02	1.4	0	#NULL!	0	0	0	0	0	0	0	0	0	0	0	0	1
2006-03-14	2006	1941-12-15	0	64.24	2	2	1479	0	1	2008-03-09	2008-03-09	1.99	0	#NULL!	1	0	0	0	0	0	1	0	0	0	0	0	2
2010-02-10	2010	1945-11-15	1	64.24	1	2	1469	0	0	#NULL!	2013-12-31	3.89	0	#NULL!	1	0	0	0	0	1	1	1	1	0	0	0	#NULL!
2012-03-13	2012	1947-12-15	1	64.24	1	3	1460	0	1	2013-08-01	2013-08-01	1.39	0	#NULL!	1	0	0	0	0	0	1	0	1	0	0	0	1
2009-01-06	2009	1944-10-15	0	64.23	3	2	1479	0	0	#NULL!	2013-12-31	4.98	0	#NULL!	1	0	0	0	0	1	1	1	1	0	0	0	#NULL!
2010-01-07	2010	1945-10-15	1	64.23	3	2	1429	1	0	#NULL!	2013-12-31	3.98	0	#NULL!	0	1	0	0	0	1	1	0	0	0	0	0	#NULL!
2002-10-08	2002	1938-07-15	1	64.23	2	3	1619	0	1	2003-06-01	2003-06-01	0.65	0	#NULL!	0	0	0	0	0	1	0	1	0	0	0	0	1
2011-07-09	2011	1947-04-15	1	64.23	2	1	1489	0	0	#NULL!	2013-12-31	2.48	0	#NULL!	1	0	0	0	0	0	0	0	0	0	0	0	#NULL!
2012-11-06	2012	1948-08-15	1	64.23	1	2	1479	0	0	#NULL!	2013-12-31	1.15	0	#NULL!	1	0	0	0	0	1	0	1	0	0	0	0	#NULL!
2007-11-06	2007	1943-08-15	1	64.23	1	2	1610	0	0	#NULL!	2013-12-31	6.15	0	#NULL!	0	0	0	0	0	0	0	0	0	0	0	0	#NULL!
2002-08-06	2002	1938-05-15	0	64.23	1	1	1479	0	0	#NULL!	2013-12-31	11.4	1	2005-11-21	0	0	0	0	0	0	0	1	0	0	0	0	#NULL!
2012-05-08	2012	1948-02-15	1	64.23	1	1	1619	0	1	2013-01-01	2013-01-01	0.65	0	#NULL!	1	0	0	0	0	1	1	0	0	0	0	0	1
2009-03-04	2009	1944-12-15	1	64.22	2	3	1479	0	1	2010-07-12	2010-07-12	1.36	0	#NULL!	0	0	0	0	0	0	1	0	0	0	0	1	1
2009-10-02	2009	1945-07-15	1	64.22	1	1	1419	1	0	#NULL!	2013-12-31	4.25	0	#NULL!	0	0	0	0	0	1	1	0	1	0	0	1	#NULL!
2006-10-03	2006	1942-07-15	1	64.22	1	3	1479	0	1	2010-12-14	2010-12-14	4.2	0	#NULL!	1	0	0	0	0	1	1	0	1	0	0	0	4
2012-12-03	2012	1948-09-15	1	64.22	1	3	1610	0	0	#NULL!	2013-12-31	1.08	0	#NULL!	0	0	0	0	0	1	1	1	0	0	0	0	#NULL!
2003-11-04	2003	1939-08-15	0	64.22	1	3	1479	0	1	2005-03-24	2005-03-24	1.39	0	#NULL!	0	0	0	0	0	0	1	0	0	0	0	0	1
2004-04-01	2004	1940-01-15	1	64.21	3	1	1479	0	0	#NULL!	2013-12-31	9.75	0	#NULL!	0	0	0	0	0	1	1	0	0	0	0	0	#NULL!
2004-03-30	2004	1940-01-15	1	64.21	3	2	1479	0	1	2007-08-11	2007-08-11	3.36	0	#NULL!	0	1	0	0	0	0	1	0	1	0	0	0	3
2005-05-31	2005	1941-03-15	1	64.21	3	3	1479	0	0	#NULL!	2013-12-31	8.59	0	#NULL!	1	0	0	0	0	0	0	1	0	0	0	0	#NULL!
2008-12-01	2008	1944-09-15	1	64.21	2	2	1479	0	0	#NULL!	2013-12-31	5.08	0	#NULL!	1	1	0	0	0	0	1	1	1	1	0	0	#NULL!
2003-12-02	2003	1939-09-15	1	64.21	2	2	1489	0	1	2006-11-18	2006-11-18	2.96	0	#NULL!	1	0	0	0	0	0	0	0	0	0	0	0	3
2011-03-01	2011	1946-12-15	1	64.21	2	2	1479	0	0	#NULL!	2013-12-31	2.84	0	#NULL!	1	0	0	0	0	0	0	0	0	0	0	0	#NULL!
2010-08-31	2010	1946-06-15	0	64.21	1	3	1479	0	0	#NULL!	2013-12-31	3.33	0	#NULL!	1	0	0	0	0	0	0	1	0	0	0	0	#NULL!
2011-05-04	2011	1947-02-15	1	64.21	1	1	1419	1	0	#NULL!	2013-12-31	2.66	0	#NULL!	1	1	0	0	0	1	1	1	0	0	0	0	#NULL!
2012-02-27	2012	1947-12-15	1	64.2	3	1	1449	1	0	#NULL!	2013-12-31	1.84	0	#NULL!	1	0	0	0	0	1	1	1	0	0	0	1	#NULL!
2012-08-28	2012	1948-06-15	1	64.2	3	2	1408	1	0	#NULL!	2013-12-31	1.34	0	#NULL!	1	0	0	0	0	0	0	0	0	0	0	0	#NULL!
2008-05-28	2008	1944-03-15	1	64.2	3	3	1610	0	1	2013-12-12	2013-12-12	5.54	0	#NULL!	0	0	0	0	0	0	1	0	0	0	0	0	6
2010-10-26	2010	1946-08-15	0	64.2	2	1	1479	0	0	#NULL!	2013-12-31	3.18	0	#NULL!	0	1	0	0	0	0	1	0	1	0	0	0	#NULL!
2010-12-27	2010	1946-10-15	1	64.2	2	3	1610	0	0	#NULL!	2013-12-31	3.01	0	#NULL!	0	0	0	0	0	0	0	0	0	0	0	0	#NULL!
2011-07-28	2011	1947-05-15	1	64.2	1	2	1460	0	0	#NULL!	2013-12-31	2.43	0	#NULL!	1	0	0	0	0	0	0	1	0	0	0	0	#NULL!
2008-11-26	2008	1944-09-15	1	64.2	1	1	1459	1	0	#NULL!	2013-12-31	5.1	1	2009-02-20	1	0	0	0	0	0	0	0	0	1	0	0	#NULL!
2004-06-24	2004	1940-04-15	1	64.19	2	2	1489	0	1	2004-08-24	2004-08-24	0.17	0	#NULL!	1	0	0	0	0	0	1	0	0	0	0	0	0
2000-07-24	2000	1936-05-15	1	64.19	2	1	1459	1	1	2001-01-06	2001-01-06	0.45	0	#NULL!	0	0	0	0	0	0	0	0	1	0	0	0	0
2004-09-21	2004	1940-07-15	1	64.19	2	2	1431	1	1	2007-04-28	2007-04-28	2.6	0	#NULL!	0	0	0	0	0	1	0	1	0	0	0	0	3
2008-11-24	2008	1944-09-15	1	64.19	1	2	1611	0	0	#NULL!	2013-12-31	5.1	0	#NULL!	1	0	0	0	0	0	0	0	0	0	0	0	#NULL!
2012-06-20	2012	1948-04-15	1	64.18	2	2	1455	1	0	#NULL!	2013-12-31	1.53	0	#NULL!	0	0	0	0	0	0	0	0	0	0	0	0	#NULL!
2002-05-18	2002	1938-03-15	1	64.18	1	2	1619	0	1	2003-03-08	2003-03-08	0.8	0	#NULL!	1	0	0	0	0	0	0	0	0	0	0	0	1
2005-01-19	2005	1940-11-15	1	64.18	1	1	1479	0	0	#NULL!	2013-12-31	8.95	0	#NULL!	1	0	0	0	0	0	0	0	0	0	0	0	#NULL!
2010-05-16	2010	1946-03-15	1	64.17	3	1	1450	1	1	2010-11-14	2010-11-14	0.5	0	#NULL!	1	0	0	0	0	0	0	0	0	0	0	0	0
2010-11-16	2010	1946-09-15	1	64.17	3	1	1419	1	1	2011-05-07	2011-05-07	0.47	0	#NULL!	0	0	0	0	0	0	0	0	0	0	0	0	0
2011-04-18	2011	1947-02-15	1	64.17	3	1	1469	0	1	2012-03-01	2012-03-01	0.87	0	#NULL!	1	0	0	0	0	0	0	0	0	0	0	0	1
2002-01-17	2002	1937-11-15	1	64.17	2	3	1412	1	1	2002-05-08	2002-05-08	0.3	0	#NULL!	1	1	0	0	0	0	1	0	0	0	0	0	0
2010-07-15	2010	1946-05-15	1	64.17	2	2	1419	1	0	#NULL!	2013-12-31	3.46	0	#NULL!	1	0	0	0	0	0	0	1	0	1	0	0	#NULL!
2002-06-17	2002	1938-04-15	1	64.17	1	3	1479	0	1	2013-04-16	2013-04-16	10.83	0	#NULL!	0	0	0	0	0	0	1	0	1	0	0	0	11
2008-03-17	2008	1944-01-15	0	64.17	1	3	1419	1	0	#NULL!	2013-12-31	5.79	0	#NULL!	0	0	0	0	0	0	1	0	0	0	0	1	#NULL!
2008-06-16	2008	1944-04-15	1	64.17	1	2	1419	1	1	2009-08-24	2009-08-24	1.19	0	#NULL!	1	0	0	0	0	0	1	0	1	0	0	0	1
2012-01-16	2012	1947-11-15	1	64.17	1	3	1419	1	1	2013-02-20	2013-02-20	1.1	0	#NULL!	0	0	0	0	0	0	1	1	0	0	0	0	1
2013-04-16	2013	1949-02-15	1	64.16	3	1	1479	0	0	#NULL!	2013-12-21	0.68	0	#NULL!	1	0	0	0	0	0	0	0	0	0	0	0	#NULL!
2001-12-13	2001	1937-10-15	0	64.16	3	2	1412	1	1	2002-05-13	2002-05-13	0.41	0	#NULL!	0	0	0	0	0	0	0	0	0	0	0	0	0
2007-04-16	2007	1943-02-15	1	64.16	3	2	1450	1	1	2009-09-03	2009-09-03	2.38	0	#NULL!	0	0	0	1	0	0	1	1	1	0	0	0	2
2010-09-13	2010	1946-07-15	1	64.16	3	1	1460	0	1	2013-06-20	2013-06-20	2.77	0	#NULL!	1	0	0	0	0	0	1	1	0	0	0	0	3
2002-07-11	2002	1938-05-15	0	64.16	3	3	1450	1	1	2003-02-05	2003-02-05	0.57	0	#NULL!	1	0	0	0	0	0	0	0	0	0	0	0	1
2011-03-14	2011	1947-01-15	0	64.16	3	2	1479	0	0	#NULL!	2013-12-31	2.8	0	#NULL!	0	0	0	0	0	1	0	1	0	0	0	0	#NULL!
2007-06-12	2007	1943-04-15	1	64.16	2	3	1450	1	0	#NULL!	2013-12-31	6.55	0	#NULL!	1	0	0	0	0	0	0	0	0	0	0	0	#NULL!
2009-06-12	2009	1945-04-15	1	64.16	2	1	1450	1	1	2012-09-23	2012-09-23	3.28	0	#NULL!	0	0	0	0	0	0	0	0	0	0	0	0	3
2005-06-13	2005	1941-04-15	1	64.16	1	2	1479	0	1	2006-01-09	2006-01-09	0.57	0	#NULL!	1	0	0	0	0	0	0	0	0	0	0	0	1
2008-04-15	2008	1944-02-15	1	64.16	1	3	1450	1	0	#NULL!	2013-12-31	5.71	0	#NULL!	1	0	0	0	0	0	0	1	1	0	0	0	#NULL!
2002-08-14	2002	1938-06-15	0	64.16	1	2	149	0	0	#NULL!	2013-12-31	11.38	1	2002-09-18	1	0	0	0	0	0	0	0	0	1	0	0	#NULL!
2012-02-10	2012	1947-12-15	1	64.16	1	3	1439	1	0	#NULL!	2013-12-31	1.89	0	#NULL!	0	0	0	0	0	0	0	1	0	0	0	0	#NULL!
2012-03-13	2012	1948-01-15	1	64.16	1	2	1420	1	0	#NULL!	2013-12-31	1.8	0	#NULL!	0	0	0	0	0	1	1	0	0	0	0	0	#NULL!
2003-06-13	2003	1939-04-15	1	64.16	1	2	1459	1	0	#NULL!	2013-12-31	10.55	0	#NULL!	1	0	0	0	0	0	0	0	0	0	0	0	#NULL!
2006-11-07	2006	1942-09-15	1	64.15	3	2	1489	0	1	2007-06-16	2007-06-16	0.61	0	#NULL!	0	0	0	0	0	0	0	0	1	0	0	1	1
2011-02-08	2011	1946-12-15	1	64.15	3	2	1479	0	0	#NULL!	2013-12-31	2.89	0	#NULL!	0	0	0	0	0	0	0	0	0	1	0	0	#NULL!
2005-01-10	2005	1940-11-15	1	64.15	2	2	1619	0	0	#NULL!	2013-12-31	8.97	0	#NULL!	0	0	0	0	0	0	0	1	0	0	0	0	#NULL!
2010-12-10	2010	1946-10-15	1	64.15	1	1	1479	0	0	#NULL!	2013-12-31	3.06	0	#NULL!	1	0	0	0	0	0	0	1	0	0	0	0	#NULL!
2009-03-12	2009	1945-01-15	1	64.15	1	1	1450	1	0	#NULL!	2013-10-16	4.6	0	#NULL!	0	0	0	0	0	0	1	0	0	0	0	0	#NULL!
2012-08-07	2012	1948-06-15	0	64.15	1	1	1410	1	0	#NULL!	2013-12-31	1.4	0	#NULL!	1	0	0	0	0	1	1	1	0	0	0	0	#NULL!
2012-11-09	2012	1948-09-15	1	64.15	1	1	1429	1	0	#NULL!	2013-12-31	1.14	0	#NULL!	0	0	0	0	0	1	1	1	0	0	0	0	#NULL!
2001-09-03	2001	1937-07-15	1	64.14	3	3	1479	0	1	2003-05-21	2003-05-21	1.71	0	#NULL!	0	0	0	0	0	0	0	0	0	0	0	0	2
2011-06-06	2011	1947-04-15	1	64.14	3	1	1419	1	1	2013-09-15	2013-09-15	2.28	0	#NULL!	1	0	0	0	0	1	1	0	0	0	0	0	2
2006-08-04	2006	1942-06-15	1	64.14	2	1	1439	1	0	#NULL!	2013-12-31	7.41	0	#NULL!	1	0	0	0	0	0	0	1	0	0	0	0	#NULL!
2005-04-06	2005	1941-02-15	1	64.14	2	3	1479	0	1	2005-10-17	2005-10-17	0.53	0	#NULL!	1	0	0	0	0	1	0	0	0	0	0	0	1
2009-05-04	2009	1945-03-15	1	64.14	2	1	1469	0	0	#NULL!	2013-12-31	4.66	0	#NULL!	0	1	0	0	0	1	1	0	1	0	0	0	#NULL!
2008-09-01	2008	1944-07-15	1	64.13	3	3	1479	0	0	#NULL!	2013-12-31	5.33	0	#NULL!	1	0	0	0	0	0	0	0	0	0	0	0	#NULL!
2011-11-03	2011	1947-09-15	1	64.13	3	3	1431	1	0	#NULL!	2013-12-31	2.16	0	#NULL!	1	1	0	0	0	0	0	0	0	0	0	0	#NULL!
2007-01-31	2007	1942-12-15	1	64.13	2	2	1618	0	0	#NULL!	2010-03-08	3.1	0	#NULL!	1	0	0	0	0	0	1	0	0	0	0	0	#NULL!
2011-03-02	2011	1947-01-15	1	64.13	2	3	1439	1	0	#NULL!	2013-12-20	2.8	0	#NULL!	1	0	0	0	0	0	1	0	1	0	0	0	#NULL!
2007-04-30	2007	1943-03-15	1	64.13	2	1	1450	1	1	2008-03-10	2008-03-10	0.86	0	#NULL!	0	0	0	0	0	0	0	0	0	0	0	0	1
2005-02-02	2005	1940-12-15	1	64.13	2	2	1431	1	0	#NULL!	2013-12-31	8.91	0	#NULL!	0	0	0	0	0	0	1	0	1	0	0	0	#NULL!
2002-03-04	2002	1938-01-15	1	64.13	2	2	1479	0	1	2010-03-31	2010-03-31	8.07	0	#NULL!	1	0	0	0	0	0	1	0	0	0	0	0	8
2011-09-30	2011	1947-08-15	0	64.13	2	3	1414	1	1	2012-03-11	2012-03-11	0.45	0	#NULL!	1	0	0	0	0	0	0	0	0	0	0	0	0
2006-10-02	2006	1942-08-15	1	64.13	1	3	143	1	0	#NULL!	2013-12-31	7.25	0	#NULL!	1	0	0	0	0	0	1	0	0	0	0	0	#NULL!
2002-10-01	2002	1938-08-15	1	64.13	1	2	146	0	1	2013-01-04	2013-01-04	10.26	0	#NULL!	1	0	0	0	0	1	1	0	1	0	0	0	10
2007-10-30	2007	1943-09-15	1	64.12	3	3	1409	1	1	2008-03-20	2008-03-20	0.39	0	#NULL!	1	0	0	0	0	0	0	0	0	0	0	0	0
2004-08-27	2004	1940-07-15	1	64.12	2	3	1479	0	0	#NULL!	2013-12-31	9.34	1	2006-01-23	0	0	0	0	0	0	1	0	1	0	0	0	#NULL!
2005-10-28	2005	1941-09-15	0	64.12	2	2	1452	1	0	#NULL!	2013-12-31	8.18	0	#NULL!	1	0	0	0	0	0	0	0	0	0	0	0	#NULL!
2011-04-27	2011	1947-03-15	1	64.12	2	2	1450	1	0	#NULL!	2013-12-31	2.68	0	#NULL!	1	0	0	0	0	0	1	0	1	0	0	0	#NULL!
2006-10-30	2006	1942-09-15	0	64.12	1	2	1479	0	0	#NULL!	2013-12-31	7.17	0	#NULL!	1	0	0	0	0	0	1	0	0	0	0	0	#NULL!
2011-06-28	2011	1947-05-15	1	64.12	1	3	1440	1	1	2012-08-08	2012-08-08	1.11	0	#NULL!	0	0	0	1	0	0	1	0	0	1	0	0	1
2007-06-29	2007	1943-05-15	1	64.12	1	1	1489	0	1	2007-10-08	2007-10-08	0.28	0	#NULL!	1	0	0	0	0	0	1	0	0	0	0	0	0
2008-12-25	2008	1944-11-15	1	64.11	3	3	1419	1	0	#NULL!	2013-12-31	5.02	0	#NULL!	0	0	0	0	0	0	0	0	0	0	0	0	#NULL!
2011-07-25	2011	1947-06-15	1	64.11	2	2	1489	0	1	2012-08-05	2012-08-05	1.03	0	#NULL!	1	0	0	0	0	0	0	0	0	0	0	0	1
2005-10-26	2005	1941-09-15	1	64.11	1	2	1460	0	1	2009-02-05	2009-02-05	3.28	0	#NULL!	1	0	0	0	0	0	0	0	0	0	0	0	3
2011-12-21	2011	1947-11-15	0	64.1	3	2	1479	0	1	2012-07-01	2012-07-01	0.53	0	#NULL!	1	1	0	0	0	0	0	0	0	0	0	0	1
2010-12-22	2010	1946-11-15	1	64.1	3	2	1469	0	1	2011-10-20	2011-10-20	0.83	0	#NULL!	1	0	0	0	0	0	1	1	0	0	0	0	1
2012-10-23	2012	1948-09-15	1	64.1	3	1	1619	0	0	#NULL!	2013-12-31	1.19	0	#NULL!	0	0	0	0	0	0	1	1	1	0	0	0	#NULL!
2010-07-20	2010	1946-06-15	1	64.1	2	3	1479	0	0	#NULL!	2013-12-31	3.45	0	#NULL!	0	0	0	0	0	0	1	1	1	0	0	0	#NULL!
2011-09-20	2011	1947-08-15	1	64.1	1	3	1459	1	1	2012-02-10	2012-02-10	0.39	0	#NULL!	1	0	0	0	0	0	0	0	0	0	0	0	0
2001-11-19	2001	1937-10-15	1	64.1	1	3	1479	0	1	2002-04-12	2002-04-12	0.39	0	#NULL!	0	0	0	0	0	0	0	0	0	0	0	0	0
2005-07-21	2005	1941-06-15	1	64.1	1	1	1479	0	1	2006-03-11	2006-03-11	0.64	0	#NULL!	1	0	0	0	0	1	0	1	0	0	0	0	1
2009-11-16	2009	1945-10-15	1	64.09	4	3	1459	1	1	2010-11-09	2010-11-09	0.98	0	#NULL!	1	0	0	0	0	1	1	0	0	0	0	0	1
2011-06-16	2011	1947-05-15	1	64.09	3	1	1430	1	1	2012-04-01	2012-04-01	0.79	0	#NULL!	1	0	0	0	0	0	0	0	0	0	0	1	1
2012-08-17	2012	1948-07-15	1	64.09	3	3	1489	0	1	2013-11-11	2013-11-11	1.23	0	#NULL!	1	0	0	0	0	0	0	0	0	0	0	0	1
2009-05-19	2009	1945-04-15	1	64.09	1	2	1401	1	0	#NULL!	2013-12-31	4.62	0	#NULL!	1	0	0	0	0	1	0	1	0	0	0	0	#NULL!
2008-11-17	2008	1944-10-15	1	64.09	1	2	1404	1	1	2011-11-24	2011-11-24	3.02	0	#NULL!	1	0	0	0	0	1	0	0	0	0	0	1	3
2006-08-15	2006	1942-07-15	1	64.08	3	3	1450	1	1	2007-04-05	2007-04-05	0.64	0	#NULL!	1	0	0	0	0	1	0	1	0	0	0	0	1
2010-10-14	2010	1946-09-15	1	64.08	3	2	1489	0	1	2011-03-21	2011-03-21	0.43	0	#NULL!	1	0	0	0	0	0	1	1	1	0	0	0	0
2009-07-16	2009	1945-06-15	1	64.08	3	2	1459	1	0	#NULL!	2013-12-31	4.46	0	#NULL!	1	0	0	0	0	1	1	0	0	0	0	0	#NULL!
2011-04-12	2011	1947-03-15	1	64.08	2	2	1419	1	1	2011-08-22	2011-08-22	0.36	0	#NULL!	1	0	0	0	0	0	1	1	0	0	0	0	0
2009-10-15	2009	1945-09-15	1	64.08	1	1	1619	0	1	2013-01-09	2013-01-09	3.24	0	#NULL!	0	0	0	0	0	1	1	1	1	0	1	0	3
2009-04-15	2009	1945-03-15	1	64.08	1	1	1419	1	0	#NULL!	2013-12-31	4.71	0	#NULL!	1	0	0	0	0	0	0	0	0	0	0	1	#NULL!
2009-05-13	2009	1945-04-15	1	64.08	1	3	1450	1	1	2010-01-11	2010-01-11	0.67	0	#NULL!	1	0	0	0	0	0	1	1	0	0	0	0	1
2010-01-12	2010	1945-12-15	0	64.08	1	2	1459	1	1	2010-12-31	2010-12-31	0.97	1	2010-01-15	1	0	0	1	0	0	0	0	0	1	0	1	1
2007-11-15	2007	1943-10-15	1	64.08	1	1	1419	1	1	2011-09-02	2011-09-02	3.8	0	#NULL!	0	0	0	0	0	0	0	0	0	0	0	0	4
2003-10-16	2003	1939-09-15	1	64.08	1	1	1459	1	1	2004-11-28	2004-11-28	1.12	0	#NULL!	0	0	0	0	0	0	0	0	0	0	0	0	1
2003-12-15	2003	1939-11-15	0	64.08	1	1	1479	0	1	2006-09-13	2006-09-13	2.75	1	2003-12-18	0	0	0	0	0	0	0	0	0	0	0	0	3
2010-11-10	2010	1946-10-15	1	64.07	4	3	1481	0	0	#NULL!	2013-12-31	3.14	1	2011-02-14	0	0	0	0	0	1	1	0	0	0	0	0	#NULL!
2010-06-09	2010	1946-05-15	1	64.07	4	2	1611	0	0	#NULL!	2013-12-31	3.56	0	#NULL!	1	0	0	0	0	0	0	0	0	0	0	0	#NULL!
2004-12-10	2004	1940-11-15	1	64.07	3	2	1498	0	1	2005-08-18	2005-08-18	0.69	0	#NULL!	0	0	0	0	0	0	0	0	0	0	0	0	1
2012-04-10	2012	1948-03-15	0	64.07	2	2	1450	1	0	#NULL!	2013-12-31	1.72	0	#NULL!	0	0	0	0	0	0	0	0	0	0	0	0	#NULL!
2012-11-10	2012	1948-10-15	1	64.07	2	2	1489	0	0	#NULL!	2013-12-31	1.14	0	#NULL!	1	0	0	0	0	1	1	1	0	1	0	0	#NULL!
2004-11-11	2004	1940-10-15	1	64.07	2	2	1479	0	1	2011-02-02	2011-02-02	6.23	0	#NULL!	0	0	0	0	0	1	0	0	0	0	0	0	6
2000-02-11	2000	1936-01-15	1	64.07	2	2	1479	0	1	2002-12-31	2002-12-31	2.89	0	#NULL!	0	0	0	0	0	0	0	0	0	0	0	0	3
2004-06-10	2004	1940-05-15	1	64.07	1	2	1479	0	1	2011-05-20	2011-05-20	6.94	0	#NULL!	1	0	0	0	0	0	0	0	0	0	0	0	7
2004-12-09	2004	1940-11-15	1	64.07	1	3	1619	0	1	2010-06-22	2010-06-22	5.53	0	#NULL!	1	0	0	0	0	1	1	0	1	0	0	0	6
2008-04-07	2008	1944-03-15	1	64.06	4	3	1410	1	0	#NULL!	2013-12-31	5.73	0	#NULL!	1	0	0	0	0	0	0	0	0	0	0	0	#NULL!
2010-05-07	2010	1946-04-15	1	64.06	2	2	1479	0	1	2011-02-12	2011-02-12	0.77	0	#NULL!	1	0	0	0	0	0	1	0	0	0	0	0	1
2010-12-06	2010	1946-11-15	1	64.06	2	3	1411	1	1	2011-03-14	2011-03-14	0.27	0	#NULL!	0	0	0	0	0	1	1	0	0	0	0	1	0
2008-11-05	2008	1944-10-15	0	64.06	2	1	1479	0	0	#NULL!	2013-12-31	5.15	0	#NULL!	1	0	0	0	0	0	0	0	0	0	0	0	#NULL!
2013-04-06	2013	1949-03-15	1	64.06	1	3	1440	1	0	#NULL!	2013-12-31	0.74	0	#NULL!	0	0	0	0	0	0	0	0	0	0	0	0	#NULL!
2001-08-06	2001	1937-07-15	0	64.06	1	3	1479	0	1	2003-03-13	2003-03-13	1.6	0	#NULL!	1	0	0	0	0	0	0	0	0	0	0	0	2
2000-11-06	2000	1936-10-15	1	64.06	1	3	149	0	0	#NULL!	2002-05-21	1.54	0	#NULL!	0	0	0	0	0	0	0	0	0	0	0	0	#NULL!
2011-08-02	2011	1947-07-15	0	64.05	4	2	1450	1	1	2013-05-17	2013-05-17	1.79	0	#NULL!	1	1	0	0	0	1	1	1	1	0	0	1	2
2012-12-05	2012	1948-11-15	1	64.05	3	3	1450	1	0	#NULL!	2013-12-31	1.07	0	#NULL!	1	0	0	0	0	0	1	0	0	0	0	0	#NULL!
2005-09-01	2005	1941-08-15	1	64.05	3	2	1489	0	1	2005-11-29	2005-11-29	0.24	0	#NULL!	0	0	0	0	0	1	1	0	1	0	1	0	0
2004-08-04	2004	1940-07-15	1	64.05	3	1	1479	0	1	2006-09-23	2006-09-23	2.14	0	#NULL!	0	0	0	0	0	1	0	0	0	0	0	0	2
2012-02-01	2012	1948-01-15	1	64.05	3	1	1431	1	0	#NULL!	2013-12-31	1.91	0	#NULL!	0	1	0	0	0	1	1	0	1	0	0	0	#NULL!
2001-02-01	2001	1937-01-15	1	64.05	3	1	1479	0	1	2002-11-15	2002-11-15	1.79	0	#NULL!	1	0	0	0	0	1	0	0	0	0	0	0	2
2012-10-04	2012	1948-09-15	1	64.05	3	2	1419	1	0	#NULL!	2013-12-31	1.24	0	#NULL!	1	0	0	0	0	0	1	0	0	0	0	0	#NULL!
2008-08-01	2008	1944-07-15	1	64.05	3	2	1420	1	0	#NULL!	2013-12-31	5.42	0	#NULL!	0	0	0	0	0	0	0	0	0	0	0	0	#NULL!
2004-08-04	2004	1940-07-15	1	64.05	2	2	1619	0	0	#NULL!	2013-12-31	9.41	0	#NULL!	0	0	0	0	0	0	0	0	0	0	0	0	#NULL!
2003-04-04	2003	1939-03-15	1	64.05	2	1	1479	0	1	2006-08-16	2006-08-16	3.37	0	#NULL!	0	0	0	0	0	0	0	0	0	0	0	0	3
2010-02-01	2010	1946-01-15	1	64.05	2	2	1450	1	1	2011-02-08	2011-02-08	1.02	0	#NULL!	1	0	0	0	0	0	0	0	0	0	0	0	1
2010-05-04	2010	1946-04-15	1	64.05	2	1	1419	1	1	2010-08-22	2010-08-22	0.3	0	#NULL!	0	0	0	0	0	1	0	0	0	0	0	0	0
2002-01-03	2002	1937-12-15	1	64.05	1	2	149	0	1	2005-07-03	2005-07-03	3.5	0	#NULL!	1	0	0	0	0	0	1	0	0	0	0	0	3
2011-12-02	2011	1947-11-15	1	64.05	1	2	1479	0	0	#NULL!	2013-12-31	2.08	0	#NULL!	1	0	0	0	0	0	1	0	0	0	0	0	#NULL!
2010-09-01	2010	1946-08-15	1	64.05	1	2	1468	0	0	#NULL!	2013-12-31	3.33	0	#NULL!	1	1	0	0	0	0	1	0	1	0	0	0	#NULL!
2010-02-01	2010	1946-01-15	0	64.05	1	1	1479	0	0	#NULL!	2013-12-31	3.91	0	#NULL!	1	0	0	0	0	0	0	0	0	0	0	0	#NULL!
2013-03-01	2013	1949-02-15	0	64.04	2	2	1412	1	0	#NULL!	2013-12-31	0.84	0	#NULL!	0	0	0	0	0	1	0	0	0	0	0	1	#NULL!
2002-10-01	2002	1938-09-15	1	64.04	1	2	1479	0	1	2003-04-11	2003-04-11	0.53	0	#NULL!	1	0	0	0	0	0	1	0	1	0	0	0	1
2011-07-01	2011	1947-06-15	1	64.04	1	3	1450	1	0	#NULL!	2013-12-31	2.5	0	#NULL!	1	0	0	0	0	0	0	0	0	0	0	0	#NULL!
2011-03-02	2011	1947-02-15	1	64.04	1	3	1479	0	1	2013-08-01	2013-08-01	2.42	0	#NULL!	1	0	0	0	0	0	0	0	0	0	0	0	2
2010-01-25	2010	1946-01-15	1	64.03	3	1	1412	1	0	#NULL!	2013-12-31	3.93	0	#NULL!	0	0	0	0	0	0	0	0	0	0	0	1	#NULL!
2012-11-26	2012	1948-11-15	1	64.03	3	1	1479	0	0	#NULL!	2013-12-31	1.1	0	#NULL!	1	1	0	0	0	1	1	0	0	1	0	0	#NULL!
2009-12-24	2009	1945-12-15	1	64.02	4	2	1419	1	1	2010-04-15	2010-04-15	0.31	0	#NULL!	1	1	0	0	0	1	1	1	0	0	0	0	0
2007-01-23	2007	1943-01-15	1	64.02	2	1	1481	0	1	2007-07-29	2007-07-29	0.51	0	#NULL!	0	0	0	0	0	0	1	0	1	0	0	0	1
2003-07-24	2003	1939-07-15	1	64.02	2	1	1489	0	0	#NULL!	2013-12-31	10.44	0	#NULL!	1	0	0	0	0	0	0	0	0	0	0	0	#NULL!
2004-03-23	2004	1940-03-15	1	64.02	2	3	1431	1	0	#NULL!	2013-12-31	9.77	0	#NULL!	1	1	0	0	0	0	1	0	0	0	0	1	#NULL!
2005-02-24	2005	1941-02-15	1	64.02	1	3	1479	0	1	2011-03-02	2011-03-02	6.02	0	#NULL!	1	0	0	0	0	0	0	0	0	0	0	0	6
2004-03-22	2004	1940-03-15	1	64.02	1	3	1439	1	1	2010-05-25	2010-05-25	6.17	0	#NULL!	0	0	0	0	0	0	0	0	0	0	0	0	6
2011-06-22	2011	1947-06-15	1	64.02	1	2	1450	1	0	#NULL!	2013-12-31	2.53	0	#NULL!	0	0	0	0	0	0	1	1	1	0	0	0	#NULL!
2011-08-17	2011	1947-08-15	1	64.01	3	3	1449	1	1	2013-01-15	2013-01-15	1.42	0	#NULL!	0	1	0	1	0	1	1	0	0	0	0	1	1
2008-05-19	2008	1944-05-15	1	64.01	2	2	1450	1	1	2012-06-04	2012-06-04	4.04	0	#NULL!	0	0	0	0	0	0	1	1	1	0	0	0	4
2007-03-19	2007	1943-03-15	1	64.01	2	3	1460	0	0	#NULL!	2013-12-31	6.79	0	#NULL!	1	0	0	0	0	0	1	0	0	0	0	0	#NULL!
2002-12-17	2002	1938-12-15	1	64.01	1	2	1479	0	0	#NULL!	2013-12-31	11.04	0	#NULL!	1	0	0	0	0	1	0	0	0	0	0	0	#NULL!
2012-01-16	2012	1948-01-15	1	64	3	2	1409	1	1	2012-09-14	2012-09-14	0.66	0	#NULL!	0	1	0	1	0	1	1	0	1	0	0	0	1
2011-02-14	2011	1947-02-15	1	64	3	1	1450	1	0	#NULL!	2013-12-31	2.88	0	#NULL!	0	0	0	0	0	0	1	0	0	0	0	0	#NULL!
2013-01-14	2013	1949-01-15	1	64	3	2	1489	0	0	#NULL!	2013-12-31	0.96	0	#NULL!	1	0	0	0	0	0	0	0	0	0	0	0	#NULL!
2010-04-14	2010	1946-04-15	1	64	3	3	1419	1	1	2011-04-23	2011-04-23	1.02	0	#NULL!	0	0	0	0	0	0	1	0	0	0	0	0	1
2010-04-16	2010	1946-04-15	1	64	2	2	1489	0	1	2010-09-30	2010-09-30	0.46	0	#NULL!	0	0	0	0	0	0	1	0	0	0	1	0	0
2012-11-16	2012	1948-11-15	1	64	2	3	1489	0	1	2013-04-18	2013-04-18	0.42	0	#NULL!	1	0	0	1	0	1	0	1	1	1	0	0	0
2010-06-15	2010	1946-06-15	1	64	2	2	1450	1	0	#NULL!	2013-12-31	3.55	0	#NULL!	0	1	0	0	0	0	1	1	1	1	0	1	#NULL!
2007-06-14	2007	1943-06-15	1	64	1	1	1479	0	0	#NULL!	2013-12-31	6.55	0	#NULL!	1	0	0	0	0	0	0	0	0	0	0	0	#NULL!
2002-03-14	2002	1938-03-15	0	64	1	1	1479	0	1	2012-03-23	2012-03-23	10.03	0	#NULL!	1	1	0	0	0	0	0	0	0	0	0	0	10
2010-04-16	2010	1946-04-15	1	64	1	3	1479	0	1	2012-05-17	2012-05-17	2.09	0	#NULL!	1	0	0	0	0	0	0	0	0	0	0	0	2
2010-09-16	2010	1946-09-15	1	64	1	2	1489	0	1	2011-02-14	2011-02-14	0.41	0	#NULL!	1	0	0	0	0	0	0	0	0	0	0	0	0
2012-11-15	2012	1948-11-15	1	64	1	2	1489	0	0	#NULL!	2013-12-31	1.13	0	#NULL!	1	0	0	0	0	0	1	1	0	0	0	0	#NULL!
2011-07-13	2011	1947-07-15	0	63.99	3	2	1612	0	0	#NULL!	2013-12-31	2.47	0	#NULL!	0	0	0	0	0	0	1	0	0	0	0	0	#NULL!
2002-07-10	2002	1938-07-15	1	63.99	3	3	1479	0	0	#NULL!	2013-12-31	11.48	0	#NULL!	0	0	0	0	0	0	0	0	0	0	0	0	#NULL!
2007-09-10	2007	1943-09-15	1	63.99	3	3	1469	0	0	#NULL!	2013-12-31	6.31	1	2008-06-21	1	0	0	0	0	1	0	0	0	0	0	0	#NULL!
2001-02-12	2001	1937-02-15	1	63.99	2	1	1489	0	1	2001-11-23	2001-11-23	0.78	0	#NULL!	1	0	0	0	0	0	0	0	0	0	0	0	1
2003-02-10	2003	1939-02-15	1	63.99	2	2	1450	1	1	2003-09-02	2003-09-02	0.56	0	#NULL!	1	0	0	0	0	0	0	0	0	0	0	0	1
2010-01-11	2010	1946-01-15	0	63.99	2	2	1459	1	0	#NULL!	2013-12-31	3.97	0	#NULL!	0	0	0	0	0	0	0	0	0	0	0	1	#NULL!
2012-04-10	2012	1948-04-15	1	63.99	2	3	1461	0	0	#NULL!	2013-12-31	1.72	0	#NULL!	1	0	0	0	0	0	1	0	0	0	0	0	#NULL!
2012-07-10	2012	1948-07-15	1	63.99	2	3	1479	0	1	2012-11-07	2012-11-07	0.33	0	#NULL!	1	0	0	0	0	0	0	0	0	0	0	0	0
2011-01-10	2011	1947-01-15	1	63.99	2	3	1439	1	0	#NULL!	2013-12-31	2.97	0	#NULL!	1	0	0	0	0	1	0	0	0	0	0	0	#NULL!
2008-02-12	2008	1944-02-15	1	63.99	1	2	1466	0	1	2009-01-14	2009-01-14	0.92	0	#NULL!	1	0	0	0	0	1	0	0	0	0	0	0	1
2011-12-13	2011	1947-12-15	1	63.99	1	1	1460	0	0	#NULL!	2013-12-31	2.05	0	#NULL!	1	0	0	0	0	0	0	0	0	0	0	0	#NULL!
2007-07-13	2007	1943-07-15	1	63.99	1	1	1499	0	0	#NULL!	2013-12-31	6.47	0	#NULL!	1	0	0	0	0	0	0	0	1	0	0	1	#NULL!
2006-04-06	2006	1942-04-15	1	63.98	3	2	1419	1	1	2013-08-02	2013-08-02	7.32	0	#NULL!	1	0	0	0	0	0	1	0	0	1	0	0	7
2003-04-07	2003	1939-04-15	1	63.98	3	2	147	0	0	#NULL!	2013-12-26	10.72	0	#NULL!	1	0	0	0	0	0	0	0	0	0	0	0	#NULL!
2010-09-06	2010	1946-09-15	1	63.98	3	3	1430	1	1	2011-08-29	2011-08-29	0.98	0	#NULL!	0	0	0	0	0	0	0	0	0	0	0	0	1
2011-03-09	2011	1947-03-15	1	63.98	2	2	1431	1	1	2013-01-05	2013-01-05	1.83	0	#NULL!	1	0	0	0	0	1	1	1	0	0	0	1	2
2008-10-07	2008	1944-10-15	1	63.98	2	1	1419	1	1	2009-05-21	2009-05-21	0.62	0	#NULL!	1	0	0	0	0	1	1	0	0	0	0	0	1
2004-10-06	2004	1940-10-15	1	63.98	1	2	1479	0	1	2006-11-11	2006-11-11	2.1	0	#NULL!	0	1	0	0	0	1	1	1	0	0	0	0	2
2012-06-06	2012	1948-06-15	1	63.98	1	1	1479	0	0	#NULL!	2013-12-31	1.57	0	#NULL!	1	0	0	0	0	0	0	0	0	0	0	0	#NULL!
2003-01-09	2003	1939-01-15	1	63.98	1	2	1419	1	1	2010-01-07	2010-01-07	7	0	#NULL!	1	0	0	0	0	0	0	0	0	0	0	0	7
2001-03-08	2001	1937-03-15	1	63.98	1	2	147	0	1	2011-02-12	2011-02-12	9.93	0	#NULL!	1	0	0	0	0	0	1	0	0	0	0	0	10
2003-11-05	2003	1939-11-15	1	63.97	3	1	1619	0	0	#NULL!	2013-12-31	10.15	0	#NULL!	0	0	0	0	0	0	0	0	0	0	0	0	#NULL!
2010-02-05	2010	1946-02-15	1	63.97	3	2	1431	1	0	#NULL!	2013-12-31	3.9	0	#NULL!	1	0	0	0	0	0	0	0	0	0	0	0	#NULL!
2002-06-04	2002	1938-06-15	1	63.97	3	2	1481	0	1	2002-12-12	2002-12-12	0.52	0	#NULL!	1	0	0	0	0	0	0	0	0	0	0	0	1
2010-05-04	2010	1946-05-15	0	63.97	3	1	1414	1	0	#NULL!	2013-12-31	3.66	0	#NULL!	0	0	0	0	0	0	1	1	1	1	0	0	#NULL!
2009-03-03	2009	1945-03-15	0	63.97	2	3	1619	0	0	#NULL!	2013-12-31	4.83	0	#NULL!	0	0	0	0	0	0	0	0	0	0	0	0	#NULL!
2012-07-05	2012	1948-07-15	1	63.97	2	1	1611	0	0	#NULL!	2013-12-31	1.49	0	#NULL!	1	0	0	0	0	1	1	1	1	0	0	0	#NULL!
2010-10-04	2010	1946-10-15	1	63.97	2	2	1618	0	0	#NULL!	2013-12-31	3.24	0	#NULL!	1	0	0	0	0	0	1	0	1	0	0	0	#NULL!
2012-03-05	2012	1948-03-15	1	63.97	2	2	1489	0	1	2012-07-31	2012-07-31	0.41	1	2012-06-07	1	1	0	0	0	0	0	0	0	1	0	0	0
2005-10-04	2005	1941-10-15	1	63.97	2	2	1489	0	0	#NULL!	2005-11-29	0.15	0	#NULL!	1	1	0	0	0	1	1	0	1	0	0	0	#NULL!
2008-03-04	2008	1944-03-15	1	63.97	1	1	1489	0	1	2008-06-28	2008-06-28	0.32	0	#NULL!	1	0	0	0	0	0	1	0	0	0	0	1	0
2004-04-05	2004	1940-04-15	1	63.97	1	2	1470	0	1	2006-01-06	2006-01-06	1.75	0	#NULL!	1	1	0	0	0	0	0	0	0	0	0	0	2
2010-11-01	2010	1946-11-15	1	63.96	3	3	1489	0	1	2011-12-20	2011-12-20	1.13	0	#NULL!	1	0	0	0	0	0	1	0	0	0	0	0	1
2008-10-01	2008	1944-10-15	1	63.96	3	2	1461	0	1	2010-03-31	2010-03-31	1.49	0	#NULL!	1	0	0	0	0	0	1	1	0	0	0	0	1
2000-12-01	2000	1936-12-15	1	63.96	2	1	1479	0	0	#NULL!	2002-06-14	1.53	0	#NULL!	1	0	0	0	0	0	0	0	0	0	0	0	#NULL!
2010-06-01	2010	1946-06-15	1	63.96	2	2	1453	1	0	#NULL!	2013-12-31	3.58	0	#NULL!	1	0	0	0	0	1	1	1	0	0	0	0	#NULL!
2001-04-02	2001	1937-04-15	1	63.96	2	2	1450	1	1	2001-09-14	2001-09-14	0.45	0	#NULL!	1	0	0	0	0	0	0	0	0	0	0	0	0
2005-05-02	2005	1941-05-15	1	63.96	1	1	1619	0	0	#NULL!	2013-12-31	8.67	0	#NULL!	0	0	0	0	0	0	0	0	0	0	0	0	#NULL!
2013-01-02	2013	1949-01-15	0	63.96	1	3	1429	1	0	#NULL!	2013-12-31	0.99	0	#NULL!	0	0	0	0	0	1	1	1	0	0	0	0	#NULL!
2011-11-29	2011	1947-12-15	1	63.96	1	2	1419	1	1	2012-05-11	2012-05-11	0.45	0	#NULL!	1	1	0	0	0	1	1	0	0	0	0	0	0
2013-08-26	2013	1949-09-15	1	63.95	2	2	1489	0	1	2013-10-26	2013-10-26	0.17	0	#NULL!	1	0	0	0	0	1	0	0	0	0	0	0	0
2010-07-26	2010	1946-08-15	0	63.95	1	2	1479	0	0	#NULL!	2013-12-31	3.43	0	#NULL!	1	0	0	0	0	1	1	1	1	0	0	0	#NULL!
2005-07-25	2005	1941-08-15	1	63.94	3	2	1419	1	1	2007-04-18	2007-04-18	1.73	0	#NULL!	1	0	0	0	0	0	0	0	0	0	0	0	2
2002-07-24	2002	1938-08-15	0	63.94	3	1	1479	0	0	#NULL!	2013-12-31	11.44	0	#NULL!	0	0	0	0	0	0	0	0	0	0	0	0	#NULL!
2002-03-24	2002	1938-04-15	1	63.94	2	1	1450	1	1	2002-12-27	2002-12-27	0.76	0	#NULL!	1	0	0	0	0	0	0	0	0	0	0	0	1
2012-02-23	2012	1948-03-15	1	63.94	1	1	1460	0	0	#NULL!	2013-12-31	1.85	0	#NULL!	1	0	0	0	0	0	0	1	1	0	0	0	#NULL!
2011-09-20	2011	1947-10-15	1	63.93	4	2	1619	0	0	#NULL!	2013-12-31	2.28	0	#NULL!	1	0	0	0	0	0	0	0	0	0	0	0	#NULL!
2011-08-22	2011	1947-09-15	1	63.93	3	2	1479	0	1	2012-10-22	2012-10-22	1.17	0	#NULL!	0	1	0	0	0	1	1	0	0	0	0	0	1
2002-09-18	2002	1938-10-15	1	63.93	3	2	1450	1	1	2003-06-12	2003-06-12	0.73	0	#NULL!	0	1	0	0	0	0	0	0	0	0	0	1	1
2002-03-20	2002	1938-04-15	1	63.93	3	1	148	0	1	2002-07-30	2002-07-30	0.36	0	#NULL!	0	0	0	0	0	0	0	0	0	0	0	0	0
2010-12-20	2010	1947-01-15	1	63.93	3	1	1401	1	1	2012-02-26	2012-02-26	1.19	0	#NULL!	0	0	0	0	0	0	0	0	0	0	0	0	1
2005-07-22	2005	1941-08-15	1	63.93	3	3	1460	0	1	2006-07-31	2006-07-31	1.02	0	#NULL!	1	1	0	0	0	1	1	0	1	0	0	0	1
2010-05-19	2010	1946-06-15	1	63.93	3	3	1459	1	0	#NULL!	2013-12-31	3.62	0	#NULL!	0	0	0	0	0	1	0	0	0	0	0	0	#NULL!
2009-10-22	2009	1945-11-15	0	63.93	1	2	1619	0	0	#NULL!	2013-12-31	4.19	0	#NULL!	0	0	0	0	0	0	1	0	1	0	0	0	#NULL!
2006-12-19	2006	1943-01-15	1	63.93	1	2	1489	0	1	2007-06-10	2007-06-10	0.47	0	#NULL!	1	0	0	0	0	0	0	0	0	0	0	1	0
2012-03-22	2012	1948-04-15	1	63.93	1	3	1450	1	0	#NULL!	2013-12-31	1.78	0	#NULL!	0	1	0	0	0	0	1	0	0	0	0	0	#NULL!
2008-02-19	2008	1944-03-15	1	63.93	1	2	1483	0	0	#NULL!	2013-12-31	5.86	0	#NULL!	1	0	0	0	0	0	0	0	0	0	0	0	#NULL!
2001-11-21	2001	1937-12-15	1	63.93	1	1	1479	0	1	2012-03-18	2012-03-18	10.32	0	#NULL!	0	0	0	0	0	0	1	0	0	0	0	0	10
2009-07-22	2009	1945-08-15	1	63.93	1	1	1480	0	0	#NULL!	2013-12-31	4.44	0	#NULL!	1	0	0	0	0	1	1	1	0	0	0	0	#NULL!
2000-09-19	2000	1936-10-15	1	63.93	1	3	1479	0	0	#NULL!	2013-12-31	13.28	0	#NULL!	0	0	0	0	0	1	0	0	0	0	0	0	#NULL!
2012-10-15	2012	1948-11-15	1	63.92	3	2	1481	0	1	2013-06-20	2013-06-20	0.68	0	#NULL!	1	1	0	0	0	0	1	0	1	1	0	0	1
2003-11-17	2003	1939-12-15	1	63.92	3	3	1479	0	0	#NULL!	2013-12-31	10.12	1	2012-02-18	1	0	0	0	0	0	0	0	0	0	0	0	#NULL!
2012-05-15	2012	1948-06-15	1	63.92	2	2	1480	0	1	2013-12-31	2013-12-31	1.63	0	#NULL!	0	0	0	0	0	1	1	0	0	0	1	0	2
2008-01-16	2008	1944-02-15	1	63.92	2	3	1611	0	1	2009-02-28	2009-02-28	1.12	0	#NULL!	1	0	0	0	0	0	0	0	0	0	0	0	1
2013-04-17	2013	1949-05-15	1	63.92	1	3	1461	0	0	#NULL!	2013-12-31	0.71	1	2013-04-26	1	1	0	0	0	1	0	1	1	1	0	0	#NULL!
2012-10-18	2012	1948-11-15	1	63.92	1	3	1489	0	0	#NULL!	2013-12-31	1.2	0	#NULL!	1	0	0	0	0	0	0	0	0	0	0	0	#NULL!
2004-07-18	2004	1940-08-15	1	63.92	1	3	1489	0	1	2005-04-25	2005-04-25	0.77	0	#NULL!	1	0	0	0	0	0	0	0	1	0	0	0	1
2006-08-17	2006	1942-09-15	1	63.92	1	3	1439	1	1	2007-01-18	2007-01-18	0.42	0	#NULL!	1	0	0	0	0	0	0	0	0	0	0	0	0
2012-08-15	2012	1948-09-15	0	63.92	1	3	1479	0	0	#NULL!	2013-12-31	1.38	0	#NULL!	1	0	0	0	0	0	0	0	0	0	0	0	#NULL!
2008-03-12	2008	1944-04-15	1	63.91	3	1	1456	1	1	2009-04-25	2009-04-25	1.12	0	#NULL!	1	0	0	0	0	0	0	0	0	0	0	0	1
2011-04-11	2011	1947-05-15	1	63.91	3	2	1483	0	0	#NULL!	2013-12-31	2.72	0	#NULL!	1	1	0	0	0	0	1	1	0	0	0	0	#NULL!
2006-03-14	2006	1942-04-15	1	63.91	3	1	1410	1	1	2007-10-07	2007-10-07	1.57	0	#NULL!	1	0	0	0	0	0	0	0	0	0	0	0	2
2012-03-13	2012	1948-04-15	1	63.91	3	2	1431	1	0	#NULL!	2013-12-31	1.8	0	#NULL!	1	0	0	0	0	1	0	0	0	0	0	0	#NULL!
2000-06-13	2000	1936-07-15	0	63.91	3	2	1479	0	1	2007-10-24	2007-10-24	7.36	0	#NULL!	0	0	0	0	0	0	0	0	0	0	0	0	7
2012-01-13	2012	1948-02-15	1	63.91	3	2	1419	1	0	#NULL!	2013-12-31	1.97	0	#NULL!	1	0	0	0	0	1	1	0	0	0	0	1	#NULL!
2001-10-13	2001	1937-11-15	1	63.91	3	2	1456	1	0	#NULL!	2013-12-31	12.22	0	#NULL!	0	0	0	0	0	0	0	0	0	0	0	1	#NULL!
2004-08-13	2004	1940-09-15	1	63.91	2	2	1479	0	0	#NULL!	2013-12-31	9.38	1	2004-10-06	1	0	0	0	0	0	0	0	0	0	0	0	#NULL!
2012-01-12	2012	1948-02-15	1	63.91	1	1	1619	0	1	2012-12-20	2012-12-20	0.94	0	#NULL!	1	0	0	0	0	0	1	0	0	0	0	0	1
2001-05-12	2001	1937-06-15	0	63.91	1	1	149	0	0	#NULL!	2013-12-31	12.64	0	#NULL!	0	0	0	0	0	0	0	0	0	0	0	0	#NULL!
2012-06-07	2012	1948-07-15	1	63.9	3	1	1460	0	0	#NULL!	2013-12-31	1.57	0	#NULL!	0	0	0	0	0	0	1	0	0	0	0	0	#NULL!
2007-11-08	2007	1943-12-15	1	63.9	3	1	1479	0	0	#NULL!	2013-12-31	6.15	0	#NULL!	1	0	0	0	0	0	1	1	0	0	0	0	#NULL!
2003-12-10	2003	1940-01-15	1	63.9	3	2	1479	0	1	2005-06-21	2005-06-21	1.53	0	#NULL!	1	0	0	0	0	0	0	0	1	0	0	0	2
2011-05-09	2011	1947-06-15	1	63.9	3	2	1450	1	1	2011-11-12	2011-11-12	0.51	0	#NULL!	0	0	0	0	0	0	0	1	0	0	0	0	1
2011-08-10	2011	1947-09-15	1	63.9	2	2	1469	0	0	#NULL!	2013-12-31	2.39	1	2011-10-05	1	0	0	0	0	0	1	1	1	1	0	0	#NULL!
2013-01-09	2013	1949-02-15	1	63.9	2	2	1619	0	1	2013-05-28	2013-05-28	0.38	0	#NULL!	1	1	0	1	0	1	1	0	1	0	0	0	0
2001-07-09	2001	1937-08-15	0	63.9	1	1	1479	0	1	2003-05-21	2003-05-21	1.86	0	#NULL!	0	0	0	0	0	1	1	1	0	0	0	0	2
2012-07-09	2012	1948-08-15	1	63.9	1	2	1459	1	0	#NULL!	2013-12-31	1.48	0	#NULL!	1	0	0	0	0	0	1	0	1	0	0	0	#NULL!
2002-05-10	2002	1938-06-15	1	63.9	1	3	147	0	0	#NULL!	2013-12-31	11.64	0	#NULL!	1	0	0	0	0	0	0	0	0	0	0	0	#NULL!
2003-04-09	2003	1939-05-15	1	63.9	1	1	1450	1	1	2004-07-22	2004-07-22	1.29	0	#NULL!	0	0	0	0	0	0	0	0	0	0	0	0	1
2010-10-11	2010	1946-11-15	1	63.9	1	3	1412	1	0	#NULL!	2013-12-31	3.22	0	#NULL!	1	0	0	0	0	0	0	0	0	0	0	0	#NULL!
2009-07-09	2009	1945-08-15	1	63.9	1	2	1460	0	0	#NULL!	2013-12-31	4.48	0	#NULL!	1	0	0	0	0	1	1	1	0	0	0	0	#NULL!
2012-11-06	2012	1948-12-15	1	63.89	4	2	1450	1	1	2013-12-17	2013-12-17	1.11	0	#NULL!	1	0	0	0	0	1	1	1	0	0	0	0	1
2011-07-06	2011	1947-08-15	1	63.89	2	2	1482	0	0	#NULL!	2013-12-31	2.49	0	#NULL!	1	1	0	0	0	0	1	1	1	0	0	0	#NULL!
2010-05-06	2010	1946-06-15	0	63.89	2	3	1460	0	0	#NULL!	2013-12-31	3.66	0	#NULL!	1	0	0	0	0	0	1	1	1	0	0	0	#NULL!
2000-09-04	2000	1936-10-15	1	63.89	2	1	1431	1	1	2001-10-30	2001-10-30	1.15	0	#NULL!	0	0	0	0	0	0	0	0	0	0	0	0	1
2003-03-04	2003	1939-04-15	1	63.89	1	1	1619	0	1	2004-03-01	2004-03-01	0.99	0	#NULL!	1	0	0	0	0	0	0	0	0	0	0	0	1
2004-07-07	2004	1940-08-15	1	63.89	1	1	1419	1	0	#NULL!	2013-12-31	9.48	0	#NULL!	1	0	0	0	0	1	1	0	0	0	0	0	#NULL!
2000-01-06	2000	1936-02-15	1	63.89	1	2	149	0	1	2000-07-06	2000-07-06	0.5	0	#NULL!	0	0	0	0	0	0	0	0	0	0	0	0	0
2012-10-05	2012	1948-11-15	1	63.89	1	1	1479	0	0	#NULL!	2013-12-31	1.24	0	#NULL!	0	0	0	0	0	0	0	0	0	0	0	0	#NULL!
2012-02-01	2012	1948-03-15	0	63.88	3	2	1450	1	0	#NULL!	2013-12-31	1.91	0	#NULL!	0	0	0	0	0	0	1	1	0	0	0	0	#NULL!
2005-12-02	2005	1942-01-15	1	63.88	3	2	1419	1	1	2006-06-11	2006-06-11	0.52	0	#NULL!	1	1	0	0	0	1	1	0	0	0	0	0	1
2013-01-29	2013	1949-03-15	1	63.88	3	3	1455	1	0	#NULL!	2013-12-31	0.92	0	#NULL!	0	0	0	0	0	1	1	1	0	0	0	0	#NULL!
2001-10-03	2001	1937-11-15	1	63.88	3	2	1619	0	1	2009-04-16	2009-04-16	7.53	0	#NULL!	0	0	0	0	0	0	1	0	0	0	0	0	8
2011-03-01	2011	1947-04-15	1	63.88	2	1	1419	1	0	#NULL!	2013-12-31	2.84	0	#NULL!	1	0	0	0	0	0	1	0	0	0	0	0	#NULL!
2000-08-31	2000	1936-10-15	1	63.88	2	1	1450	1	1	2007-09-05	2007-09-05	7.01	0	#NULL!	0	0	0	0	0	1	1	0	1	0	0	0	7
2005-06-01	2005	1941-07-15	1	63.88	1	3	1499	0	1	2007-03-10	2007-03-10	1.77	0	#NULL!	0	0	0	0	0	0	1	1	1	0	0	0	2
2011-06-01	2011	1947-07-15	1	63.88	1	3	1480	0	0	#NULL!	2013-12-31	2.58	0	#NULL!	1	1	0	0	0	0	1	0	0	0	0	0	#NULL!
2004-06-02	2004	1940-07-15	0	63.88	1	1	1469	0	0	#NULL!	2013-12-31	9.58	0	#NULL!	1	0	0	0	0	0	0	0	0	0	0	0	#NULL!
2009-07-28	2009	1945-09-15	1	63.87	3	2	1458	1	1	2010-12-30	2010-12-30	1.42	0	#NULL!	1	0	0	0	0	0	1	0	0	0	0	0	1
2012-07-30	2012	1948-09-15	1	63.87	3	1	1489	0	0	#NULL!	2013-12-31	1.42	0	#NULL!	1	0	0	0	0	0	0	1	1	0	0	0	#NULL!
2003-06-29	2003	1939-08-15	0	63.87	3	2	1468	0	0	#NULL!	2013-12-31	10.51	0	#NULL!	1	0	0	0	0	0	1	0	0	0	0	0	#NULL!
2013-02-25	2013	1949-04-15	1	63.87	3	2	1450	1	1	2013-09-26	2013-09-26	0.58	0	#NULL!	1	0	0	0	0	1	0	1	0	0	0	0	1
2013-10-30	2013	1949-12-15	1	63.87	3	2	1450	1	0	#NULL!	2013-12-31	0.17	0	#NULL!	0	0	0	0	0	0	1	1	1	0	0	0	#NULL!
2006-07-31	2006	1942-09-15	1	63.87	2	2	1479	0	1	2008-11-11	2008-11-11	2.28	0	#NULL!	1	0	0	0	0	0	1	0	1	0	0	0	2
2009-12-30	2009	1946-02-15	1	63.87	2	2	1450	1	0	#NULL!	2013-12-31	4	0	#NULL!	1	0	0	0	0	0	0	0	0	0	0	0	#NULL!
2012-11-28	2012	1949-01-15	0	63.87	2	2	1469	0	0	#NULL!	2013-12-31	1.09	0	#NULL!	1	1	0	0	0	0	1	1	0	0	0	0	#NULL!
2008-10-27	2008	1944-12-15	1	63.87	2	2	1489	0	1	2009-04-16	2009-04-16	0.47	0	#NULL!	1	1	0	0	0	0	1	1	0	0	0	0	0
2005-06-28	2005	1941-08-15	1	63.87	1	2	1450	1	1	2008-07-25	2008-07-25	3.07	0	#NULL!	1	0	0	0	0	0	1	0	0	0	0	0	3
2004-11-29	2004	1941-01-15	1	63.87	1	1	1481	0	1	2009-01-29	2009-01-29	4.17	0	#NULL!	1	0	0	0	0	0	0	0	0	0	0	0	4
2008-03-25	2008	1944-05-15	1	63.86	4	2	1452	1	1	2012-02-27	2012-02-27	3.93	0	#NULL!	1	0	0	0	0	0	0	0	0	0	0	0	4
2008-10-24	2008	1944-12-15	1	63.86	3	2	1410	1	1	2012-01-17	2012-01-17	3.23	0	#NULL!	1	0	0	0	0	0	1	0	0	0	0	0	3
2003-03-24	2003	1939-05-15	1	63.86	3	2	1430	1	0	#NULL!	2013-12-31	10.77	0	#NULL!	0	0	0	0	0	0	0	0	0	0	0	0	#NULL!
2008-03-25	2008	1944-05-15	1	63.86	3	3	1479	0	1	2008-07-24	2008-07-24	0.33	0	#NULL!	1	0	0	0	0	0	0	0	0	0	0	0	0
2010-03-24	2010	1946-05-15	1	63.86	3	2	1489	0	1	2011-06-22	2011-06-22	1.25	0	#NULL!	1	0	0	0	0	0	1	1	0	0	0	0	1
2000-06-24	2000	1936-08-15	1	63.86	2	2	1479	0	1	2010-11-23	2010-11-23	10.41	0	#NULL!	1	0	0	0	0	0	0	0	0	0	0	0	10
2012-06-25	2012	1948-08-15	1	63.86	2	1	1479	0	0	#NULL!	2013-12-31	1.52	0	#NULL!	0	0	0	0	0	1	1	1	1	0	0	0	#NULL!
2007-12-27	2007	1944-02-15	1	63.86	2	3	1469	0	0	#NULL!	2013-12-31	6.01	0	#NULL!	1	0	0	0	0	1	0	1	0	0	0	0	#NULL!
2011-07-27	2011	1947-09-15	1	63.86	1	1	1479	0	0	#NULL!	2013-12-31	2.43	0	#NULL!	1	0	0	0	0	0	0	0	0	0	0	0	#NULL!
2013-02-22	2013	1949-04-15	1	63.86	1	3	1431	1	0	#NULL!	2013-12-31	0.85	0	#NULL!	0	0	0	0	0	1	1	1	1	0	0	0	#NULL!
2006-02-21	2006	1942-04-15	1	63.85	4	2	1439	1	0	#NULL!	2013-12-31	7.86	0	#NULL!	0	0	0	0	0	0	0	0	0	0	0	0	#NULL!
2007-08-20	2007	1943-10-15	1	63.85	2	1	1469	0	1	2009-02-14	2009-02-14	1.49	0	#NULL!	1	0	0	0	0	0	0	0	1	1	0	0	1
2009-12-22	2009	1946-02-15	1	63.85	1	1	1469	0	0	#NULL!	2013-12-31	4.02	0	#NULL!	1	0	0	1	0	1	1	1	0	1	0	0	#NULL!
2011-10-23	2011	1947-12-15	1	63.85	1	1	1479	0	0	#NULL!	2013-12-31	2.19	0	#NULL!	1	1	0	0	0	0	0	1	0	0	0	0	#NULL!
2011-03-21	2011	1947-05-15	0	63.85	1	3	1479	0	0	#NULL!	2013-12-31	2.78	0	#NULL!	1	0	0	0	0	0	1	1	0	0	0	0	#NULL!
2013-02-18	2013	1949-04-15	1	63.85	1	1	1459	1	0	#NULL!	2013-12-31	0.87	0	#NULL!	1	0	0	0	0	0	1	0	0	0	0	0	#NULL!
2007-10-16	2007	1943-12-15	1	63.84	3	2	1479	0	0	#NULL!	2013-12-13	6.16	0	#NULL!	0	0	0	0	0	1	1	1	1	0	0	0	#NULL!
2009-02-15	2009	1945-04-15	1	63.84	3	2	1489	0	1	2009-12-07	2009-12-07	0.81	0	#NULL!	1	0	0	0	0	0	1	0	0	0	0	0	1
2009-11-16	2009	1946-01-15	1	63.84	2	3	1450	1	0	#NULL!	2013-12-31	4.12	0	#NULL!	1	0	0	0	0	0	1	0	0	0	0	0	#NULL!
2011-11-16	2011	1948-01-15	1	63.84	2	1	1410	1	0	#NULL!	2013-12-31	2.12	0	#NULL!	1	0	0	0	0	0	0	1	0	0	0	0	#NULL!
2006-10-16	2006	1942-12-15	1	63.84	2	1	1431	1	1	2009-02-02	2009-02-02	2.3	0	#NULL!	1	0	0	0	0	0	0	0	0	0	0	0	2
2007-04-17	2007	1943-06-15	1	63.84	2	2	1410	1	1	2007-12-27	2007-12-27	0.7	0	#NULL!	1	0	0	0	0	0	0	0	0	0	0	0	1
2012-05-16	2012	1948-07-15	1	63.84	2	2	1460	0	0	#NULL!	2013-12-31	1.63	0	#NULL!	0	1	0	0	0	1	1	1	1	1	0	0	#NULL!
2011-09-19	2011	1947-11-15	1	63.84	1	2	1459	1	1	2012-11-25	2012-11-25	1.19	0	#NULL!	0	0	0	0	0	0	1	0	0	0	0	0	1
2010-11-19	2010	1947-01-15	1	63.84	1	1	1412	1	0	#NULL!	2013-12-31	3.12	0	#NULL!	0	0	0	0	0	1	1	1	1	0	0	0	#NULL!
2010-01-13	2010	1946-03-15	0	63.83	3	1	1479	0	0	#NULL!	2013-12-31	3.96	0	#NULL!	1	0	0	0	0	0	0	0	0	0	0	0	#NULL!
2003-05-13	2003	1939-07-15	1	63.83	2	2	1459	1	1	2006-10-19	2006-10-19	3.44	0	#NULL!	0	0	0	0	0	0	1	0	0	0	0	0	3
2004-10-14	2004	1940-12-15	1	63.83	2	2	1479	0	1	2012-11-13	2012-11-13	8.08	0	#NULL!	1	0	0	0	0	0	0	0	0	0	0	0	8
2007-09-13	2007	1943-11-15	1	63.83	2	2	1428	1	1	2009-02-02	2009-02-02	1.39	0	#NULL!	1	0	0	0	0	0	0	0	0	0	0	0	1
2009-10-13	2009	1945-12-15	1	63.83	1	2	1460	0	0	#NULL!	2013-12-31	4.22	0	#NULL!	1	0	0	0	0	1	0	1	0	0	0	0	#NULL!
2008-11-14	2008	1945-01-15	1	63.83	1	2	1455	1	1	2009-01-04	2009-01-04	0.14	0	#NULL!	1	1	0	0	0	1	1	0	0	1	0	0	0
2011-12-14	2011	1948-02-15	1	63.83	1	2	1450	1	0	#NULL!	2013-12-31	2.05	0	#NULL!	0	0	0	0	0	0	0	0	0	0	0	0	#NULL!
2006-01-12	2006	1942-03-15	1	63.83	1	2	1489	0	0	#NULL!	2013-12-31	7.97	0	#NULL!	1	0	0	0	0	0	0	0	0	0	0	0	#NULL!
2009-01-08	2009	1945-03-15	1	63.82	4	1	1450	1	1	2009-09-19	2009-09-19	0.7	0	#NULL!	1	0	0	0	0	0	0	0	0	0	0	0	1
2008-07-11	2008	1944-09-15	1	63.82	3	2	1450	1	0	#NULL!	2013-12-31	5.47	0	#NULL!	0	0	0	0	0	0	0	0	0	0	0	1	#NULL!
2012-02-08	2012	1948-04-15	0	63.82	2	1	1412	1	0	#NULL!	2013-12-31	1.89	0	#NULL!	0	0	0	0	0	0	1	1	0	0	0	1	#NULL!
2009-03-12	2009	1945-05-15	0	63.82	1	1	1479	0	0	#NULL!	2013-12-31	4.8	0	#NULL!	1	0	0	0	0	1	1	1	1	0	0	0	#NULL!
2002-08-12	2002	1938-10-15	1	63.82	1	2	1489	0	1	2007-07-07	2007-07-07	4.9	0	#NULL!	1	0	0	0	0	0	0	0	0	0	0	0	5
2001-07-11	2001	1937-09-15	1	63.82	1	1	1449	1	0	#NULL!	2013-12-31	12.47	0	#NULL!	0	0	0	0	0	0	0	0	0	0	0	1	#NULL!
2010-08-11	2010	1946-10-15	1	63.82	1	2	1419	1	0	#NULL!	2013-12-23	3.37	0	#NULL!	1	0	0	1	0	0	1	0	1	0	0	0	#NULL!
2008-09-05	2008	1944-11-15	1	63.81	4	1	1610	0	1	2010-03-19	2010-03-19	1.53	0	#NULL!	1	1	0	0	0	0	1	1	1	0	0	1	2
2006-02-06	2006	1942-04-15	1	63.81	4	1	1419	1	0	#NULL!	2013-12-31	7.9	0	#NULL!	0	0	0	0	0	0	0	0	1	0	0	0	#NULL!
2008-04-07	2008	1944-06-15	1	63.81	4	3	1450	1	1	2009-08-17	2009-08-17	1.36	0	#NULL!	0	0	0	0	0	1	0	1	0	0	0	0	1
2000-06-07	2000	1936-08-15	1	63.81	3	2	1431	1	0	#NULL!	2001-01-13	0.6	0	#NULL!	0	0	0	0	0	0	0	0	0	0	0	1	#NULL!
2008-07-07	2008	1944-09-15	1	63.81	3	1	1469	0	1	2011-01-16	2011-01-16	2.53	0	#NULL!	1	0	0	0	0	0	1	0	1	0	0	0	3
2010-11-08	2010	1947-01-15	1	63.81	2	2	1459	1	0	#NULL!	2013-12-31	3.15	0	#NULL!	1	0	0	0	0	1	0	0	0	0	0	0	#NULL!
2004-01-05	2004	1940-03-15	0	63.81	2	1	1489	0	1	2006-11-25	2006-11-25	2.89	0	#NULL!	0	0	0	0	0	0	0	0	0	0	0	0	3
2000-11-06	2000	1937-01-15	1	63.81	1	3	1479	0	0	#NULL!	2013-12-31	13.15	0	#NULL!	0	0	0	0	0	0	0	0	0	0	0	0	#NULL!
2010-05-07	2010	1946-07-15	1	63.81	1	3	1610	0	0	#NULL!	2013-12-31	3.65	0	#NULL!	0	0	0	0	0	0	0	0	0	0	0	0	#NULL!
2011-04-07	2011	1947-06-15	0	63.81	1	2	1478	0	0	#NULL!	2013-12-31	2.74	1	2011-04-18	1	1	0	0	1	1	1	0	1	1	0	0	#NULL!
2011-01-03	2011	1947-03-15	1	63.81	1	2	1449	1	0	#NULL!	2013-12-31	2.99	0	#NULL!	0	0	0	0	0	1	1	1	0	0	0	0	#NULL!
2012-08-06	2012	1948-10-15	1	63.81	1	1	1410	1	0	#NULL!	2013-12-31	1.4	0	#NULL!	1	0	0	0	0	0	1	1	0	0	0	0	#NULL!
2008-07-08	2008	1944-09-15	1	63.81	1	2	1460	0	0	#NULL!	2013-12-31	5.48	0	#NULL!	1	0	0	0	0	0	1	0	0	0	0	0	#NULL!
2012-10-04	2012	1948-12-15	1	63.8	4	3	1421	1	0	#NULL!	2013-12-31	1.24	0	#NULL!	1	0	0	0	0	0	1	1	1	0	0	1	#NULL!
2010-09-03	2010	1946-11-15	1	63.8	2	2	1440	1	0	#NULL!	2013-12-31	3.33	0	#NULL!	0	0	0	0	0	0	0	1	0	0	0	0	#NULL!
2005-10-03	2005	1941-12-15	1	63.8	2	1	1462	0	1	2006-05-02	2006-05-02	0.58	0	#NULL!	1	0	0	0	0	0	0	0	0	0	0	0	1
2003-01-02	2003	1939-03-15	1	63.8	2	2	1479	0	0	#NULL!	2013-12-31	11	0	#NULL!	0	0	0	0	0	0	0	0	0	0	0	0	#NULL!
2012-12-04	2012	1949-02-15	1	63.8	2	2	1489	0	1	2013-04-17	2013-04-17	0.37	0	#NULL!	1	0	0	0	0	0	1	0	0	0	0	0	0
2001-11-02	2001	1938-01-15	1	63.8	2	2	1489	0	1	2007-06-02	2007-06-02	5.58	0	#NULL!	1	0	0	0	0	0	0	0	0	0	0	0	6
2012-04-02	2012	1948-06-15	1	63.8	2	1	1419	1	1	2012-08-30	2012-08-30	0.41	0	#NULL!	1	0	0	0	0	0	1	0	0	0	0	0	0
2012-12-04	2012	1949-02-15	1	63.8	1	1	1461	0	0	#NULL!	2013-12-31	1.07	0	#NULL!	1	0	0	0	0	0	0	1	0	0	0	0	#NULL!
2011-02-01	2011	1947-04-15	1	63.8	1	2	1419	1	0	#NULL!	2013-12-31	2.91	0	#NULL!	0	1	0	0	0	1	1	1	1	0	0	0	#NULL!
2005-09-02	2005	1941-11-15	1	63.8	1	2	161	0	1	2008-08-01	2008-08-01	2.91	0	#NULL!	0	0	0	0	0	1	1	1	1	0	0	0	3
2004-09-30	2004	1940-12-15	1	63.79	4	2	1459	1	1	2005-02-03	2005-02-03	0.34	0	#NULL!	0	0	0	0	0	0	0	0	0	0	0	0	0
2010-09-01	2010	1946-11-15	0	63.79	3	3	1412	1	1	2010-10-23	2010-10-23	0.14	0	#NULL!	0	0	0	0	0	1	1	1	0	1	0	1	0
2011-04-01	2011	1947-06-15	1	63.79	2	2	1469	0	0	#NULL!	2013-12-31	2.75	0	#NULL!	1	0	0	0	0	0	1	0	0	0	0	0	#NULL!
2003-07-29	2003	1939-10-15	1	63.79	2	2	1481	0	0	#NULL!	2013-12-31	10.43	0	#NULL!	1	0	0	0	0	0	0	0	0	0	0	0	#NULL!
2007-08-01	2007	1943-10-15	1	63.79	2	2	1419	1	0	#NULL!	2013-12-31	6.42	0	#NULL!	1	0	0	0	0	1	0	0	1	0	0	0	#NULL!
2013-02-26	2013	1949-05-15	1	63.79	1	2	1412	1	0	#NULL!	2013-12-31	0.84	0	#NULL!	1	0	0	0	0	0	0	0	0	0	0	0	#NULL!
2005-05-31	2005	1941-08-15	1	63.79	1	2	1479	0	1	2005-08-01	2005-08-01	0.17	0	#NULL!	1	0	0	0	0	0	0	0	0	0	0	0	0
2008-09-01	2008	1944-11-15	1	63.79	1	3	1489	0	1	2009-08-25	2009-08-25	0.98	0	#NULL!	1	1	0	1	0	1	1	0	0	0	0	0	1
2008-06-29	2008	1944-09-15	1	63.79	1	3	1450	1	0	#NULL!	2013-12-31	5.51	0	#NULL!	1	0	0	0	0	0	1	0	1	0	0	0	#NULL!
2003-07-28	2003	1939-10-15	1	63.78	4	3	1450	1	1	2003-12-09	2003-12-09	0.37	0	#NULL!	1	0	0	0	0	0	0	0	0	0	0	0	0
2012-03-27	2012	1948-06-15	1	63.78	4	1	1430	1	1	2012-09-25	2012-09-25	0.5	0	#NULL!	1	0	0	0	0	0	1	0	0	0	0	0	0
2010-05-25	2010	1946-08-15	1	63.78	3	3	1450	1	1	2010-10-14	2010-10-14	0.39	0	#NULL!	0	0	0	0	0	1	0	1	1	1	0	0	0
2010-07-26	2010	1946-10-15	1	63.78	3	1	1419	1	1	2011-07-05	2011-07-05	0.94	0	#NULL!	1	0	0	0	0	0	0	0	0	0	0	1	1
2006-07-26	2006	1942-10-15	1	63.78	2	2	1459	1	1	2007-03-21	2007-03-21	0.65	0	#NULL!	1	0	0	0	0	0	0	0	0	0	0	0	1
2008-07-28	2008	1944-10-15	1	63.78	1	1	1459	1	1	2008-09-13	2008-09-13	0.13	0	#NULL!	0	0	0	0	0	0	0	0	0	0	0	1	0
2006-09-25	2006	1942-12-15	1	63.78	1	1	1460	0	0	#NULL!	2013-12-31	7.27	0	#NULL!	1	0	0	0	0	1	1	0	0	0	0	0	#NULL!
2010-09-24	2010	1946-12-15	1	63.78	1	1	1459	1	1	2010-12-29	2010-12-29	0.26	0	#NULL!	1	1	0	1	0	1	1	1	0	0	0	0	0
2012-02-23	2012	1948-05-15	1	63.78	1	2	1459	1	0	#NULL!	2013-12-31	1.85	0	#NULL!	1	0	0	0	0	0	1	0	0	0	0	0	#NULL!
2008-06-26	2008	1944-09-15	1	63.78	1	3	1489	0	1	2008-10-26	2008-10-26	0.33	0	#NULL!	1	0	0	0	0	0	0	0	0	0	0	0	0
2009-08-25	2009	1945-11-15	1	63.78	1	1	1489	0	1	2010-12-24	2010-12-24	1.33	0	#NULL!	1	0	0	0	0	0	0	0	0	0	0	0	1
2013-01-22	2013	1949-04-15	1	63.77	4	1	1481	0	0	#NULL!	2013-12-31	0.94	1	2013-03-05	0	0	0	1	0	1	1	0	1	1	0	0	#NULL!
2004-09-21	2004	1940-12-15	0	63.77	4	1	1479	0	0	#NULL!	2013-12-31	9.28	0	#NULL!	0	0	0	0	0	0	1	1	0	0	0	0	#NULL!
2000-07-24	2000	1936-10-15	1	63.77	3	2	1470	0	1	2000-11-06	2000-11-06	0.29	0	#NULL!	0	0	0	0	0	0	1	0	0	0	0	0	0
2000-10-22	2000	1937-01-15	1	63.77	3	2	1489	0	1	2001-07-26	2001-07-26	0.76	0	#NULL!	1	0	0	0	0	1	0	0	0	0	0	0	1
2010-10-22	2010	1947-01-15	0	63.77	1	2	1479	0	0	#NULL!	2013-12-31	3.19	0	#NULL!	1	0	0	0	0	1	0	0	1	0	0	0	#NULL!
2012-11-24	2012	1949-02-15	1	63.77	1	2	1450	1	0	#NULL!	2013-12-31	1.1	0	#NULL!	1	0	0	0	0	0	0	1	0	0	0	0	#NULL!
2004-12-21	2004	1941-03-15	1	63.77	1	2	1479	0	0	#NULL!	2013-12-31	9.03	0	#NULL!	0	0	0	0	0	0	0	0	0	0	0	0	#NULL!
2004-03-23	2004	1940-06-15	1	63.77	1	3	1489	0	1	2004-10-25	2004-10-25	0.59	0	#NULL!	1	0	0	0	0	1	1	1	0	0	0	0	1
2010-05-24	2010	1946-08-15	1	63.77	1	3	1479	0	0	#NULL!	2013-12-31	3.61	0	#NULL!	0	0	0	0	0	0	1	1	0	0	0	0	#NULL!
2012-06-19	2012	1948-09-15	1	63.76	4	2	1400	1	0	#NULL!	2013-12-31	1.53	0	#NULL!	1	0	0	0	0	1	1	1	0	0	0	0	#NULL!
2004-04-20	2004	1940-07-15	1	63.76	3	3	1450	1	1	2005-06-03	2005-06-03	1.12	0	#NULL!	0	0	0	0	0	0	0	0	0	0	0	0	1
2008-06-18	2008	1944-09-15	1	63.76	2	2	1479	0	0	#NULL!	2013-12-31	5.54	0	#NULL!	1	0	0	0	0	0	0	0	0	0	0	0	#NULL!
2012-12-17	2012	1949-03-15	1	63.76	1	3	1419	1	0	#NULL!	2013-12-31	1.04	0	#NULL!	1	0	0	0	0	1	1	1	1	0	0	1	#NULL!
2012-09-13	2012	1948-12-15	1	63.75	3	2	1610	0	0	#NULL!	2013-12-31	1.3	0	#NULL!	0	0	0	0	0	0	1	1	1	0	0	0	#NULL!
2007-09-14	2007	1943-12-15	1	63.75	3	2	1479	0	1	2010-10-19	2010-10-19	3.1	0	#NULL!	1	0	0	0	0	0	1	0	0	0	0	0	3
2006-06-15	2006	1942-09-15	1	63.75	3	2	1489	0	1	2007-09-10	2007-09-10	1.24	0	#NULL!	1	0	0	0	0	0	1	0	0	0	0	0	1
2012-02-14	2012	1948-05-15	1	63.75	3	3	1479	0	1	2013-03-14	2013-03-14	1.08	0	#NULL!	0	1	0	0	0	1	1	1	1	0	0	0	1
2008-01-15	2008	1944-04-15	0	63.75	3	3	1431	1	0	#NULL!	2013-12-31	5.96	0	#NULL!	0	1	0	0	0	0	1	0	1	0	0	1	#NULL!
2010-05-16	2010	1946-08-15	1	63.75	3	1	1479	0	0	#NULL!	2013-12-31	3.63	0	#NULL!	1	0	0	0	0	0	0	0	0	0	0	0	#NULL!
2008-07-16	2008	1944-10-15	1	63.75	2	1	1479	0	1	2011-10-20	2011-10-20	3.26	0	#NULL!	1	0	0	0	0	0	0	0	0	0	0	0	3
2008-09-14	2008	1944-12-15	1	63.75	2	1	1489	0	0	#NULL!	2013-12-31	5.3	1	2012-08-13	1	0	0	0	0	1	0	1	0	0	0	0	#NULL!
2002-05-17	2002	1938-08-15	1	63.75	1	2	1450	1	1	2004-01-29	2004-01-29	1.7	0	#NULL!	1	0	0	0	0	0	1	0	0	0	0	0	2
2011-11-16	2011	1948-02-15	1	63.75	1	3	1459	1	0	#NULL!	2013-12-31	2.12	0	#NULL!	1	0	0	0	0	0	1	1	1	0	0	0	#NULL!
2008-10-12	2008	1945-01-15	1	63.74	3	2	1479	0	0	#NULL!	2013-12-31	5.22	0	#NULL!	0	0	0	0	0	0	0	0	0	0	0	0	#NULL!
2007-07-11	2007	1943-10-15	1	63.74	3	2	1481	0	1	2013-06-11	2013-06-11	5.92	0	#NULL!	1	0	0	0	0	0	1	0	0	0	0	0	6
2010-08-12	2010	1946-11-15	1	63.74	3	1	1479	0	1	2010-12-12	2010-12-12	0.33	0	#NULL!	1	0	0	0	0	1	1	1	0	0	0	0	0
2010-08-11	2010	1946-11-15	1	63.74	3	1	1412	1	1	2012-06-21	2012-06-21	1.86	0	#NULL!	0	0	0	0	0	1	1	1	1	0	0	1	2
2008-03-11	2008	1944-06-15	1	63.74	1	3	1479	0	0	#NULL!	2013-12-31	5.81	0	#NULL!	1	0	0	0	0	0	1	0	0	0	0	0	#NULL!
2000-06-12	2000	1936-09-15	1	63.74	1	3	1419	1	1	2005-01-17	2005-01-17	4.6	0	#NULL!	0	0	0	0	0	1	0	0	1	0	0	0	5
2010-10-07	2010	1947-01-15	1	63.73	3	1	1419	1	1	2011-07-26	2011-07-26	0.8	0	#NULL!	1	1	0	0	0	0	1	0	0	0	0	0	1
2004-04-07	2004	1940-07-15	1	63.73	3	2	1453	1	1	2004-09-11	2004-09-11	0.43	0	#NULL!	0	0	0	0	0	0	0	0	0	0	1	0	0
2011-11-07	2011	1948-02-15	1	63.73	3	3	1619	0	0	#NULL!	2013-12-31	2.15	0	#NULL!	1	0	0	0	0	0	0	0	0	0	0	0	#NULL!
2001-12-05	2001	1938-03-15	1	63.73	3	2	1619	0	1	2010-10-19	2010-10-19	8.87	0	#NULL!	1	0	0	0	0	0	0	0	0	0	0	0	9
2008-10-08	2008	1945-01-15	1	63.73	2	2	1460	0	1	2009-01-12	2009-01-12	0.26	0	#NULL!	0	0	0	0	0	0	0	0	0	0	0	0	0
2001-10-08	2001	1938-01-15	1	63.73	2	1	1489	0	1	2002-01-24	2002-01-24	0.3	0	#NULL!	0	1	0	0	0	1	1	0	0	0	0	0	0
2010-08-09	2010	1946-11-15	1	63.73	2	2	1467	0	1	2012-07-05	2012-07-05	1.91	0	#NULL!	1	0	0	0	0	1	1	1	0	0	0	0	2
2008-07-07	2008	1944-10-15	1	63.73	2	2	1450	1	1	2008-11-02	2008-11-02	0.32	0	#NULL!	1	0	0	0	0	0	0	0	0	0	0	0	0
2003-03-07	2003	1939-06-15	1	63.73	2	1	1479	0	1	2010-03-22	2010-03-22	7.04	0	#NULL!	0	0	0	0	0	1	0	0	0	0	0	0	7
2011-07-07	2011	1947-10-15	1	63.73	2	2	1489	0	1	2012-05-21	2012-05-21	0.87	0	#NULL!	1	0	0	0	0	0	1	0	1	0	0	0	1
2006-02-06	2006	1942-05-15	1	63.73	1	3	1479	0	0	#NULL!	2013-12-31	7.9	0	#NULL!	1	0	0	0	0	0	0	0	1	0	0	0	#NULL!
2003-11-05	2003	1940-02-15	0	63.72	3	2	1479	0	1	2005-07-09	2005-07-09	1.68	0	#NULL!	0	1	0	0	0	0	1	0	0	0	0	0	2
2004-08-04	2004	1940-11-15	1	63.72	3	2	1479	0	1	2012-02-14	2012-02-14	7.53	0	#NULL!	0	0	0	0	0	0	0	0	0	0	0	0	8
2005-08-05	2005	1941-11-15	0	63.72	3	2	1479	0	1	2007-10-08	2007-10-08	2.17	0	#NULL!	0	0	0	0	0	1	1	1	1	0	1	0	2
2010-10-05	2010	1947-01-15	1	63.72	2	1	1419	1	0	#NULL!	2013-12-31	3.24	0	#NULL!	1	0	0	1	0	0	0	0	0	0	0	0	#NULL!
2002-06-04	2002	1938-09-15	1	63.72	2	2	1459	1	1	2003-01-06	2003-01-06	0.59	0	#NULL!	0	0	0	0	0	0	0	0	0	0	0	0	1
2006-12-04	2006	1943-03-15	1	63.72	2	2	1410	1	1	2007-01-23	2007-01-23	0.14	0	#NULL!	1	0	0	0	0	0	0	0	0	0	0	0	0
2011-08-01	2011	1947-11-15	1	63.71	3	2	1479	0	0	#NULL!	2013-12-31	2.42	0	#NULL!	1	0	0	0	0	0	1	0	0	0	0	0	#NULL!
2008-09-01	2008	1944-12-15	1	63.71	3	3	1453	1	0	#NULL!	2013-12-31	5.33	0	#NULL!	1	0	0	0	0	0	0	0	0	0	0	0	#NULL!
2011-11-30	2011	1948-03-15	1	63.71	3	1	1456	1	0	#NULL!	2013-12-31	2.09	0	#NULL!	1	0	0	0	0	0	0	0	0	0	0	1	#NULL!
2012-07-02	2012	1948-10-15	1	63.71	2	1	1419	1	0	#NULL!	2013-12-31	1.5	0	#NULL!	0	0	0	0	0	1	1	1	1	0	0	0	#NULL!
2004-06-01	2004	1940-09-15	1	63.71	2	2	1619	0	1	2008-02-08	2008-02-08	3.69	0	#NULL!	0	1	0	1	0	0	1	0	0	0	1	0	4
2003-09-30	2003	1940-01-15	1	63.71	2	1	1450	1	1	2003-11-23	2003-11-23	0.15	0	#NULL!	1	0	0	1	0	0	1	0	0	1	0	0	0
2002-08-01	2002	1938-11-15	0	63.71	1	2	1479	0	1	2004-03-03	2004-03-03	1.59	0	#NULL!	1	0	0	0	0	0	1	0	0	0	0	0	2
2009-07-28	2009	1945-11-15	1	63.7	3	3	1450	1	1	2009-10-07	2009-10-07	0.19	0	#NULL!	1	0	0	0	0	0	1	0	0	0	0	0	0
2013-11-25	2013	1950-03-15	1	63.7	3	3	1419	1	0	#NULL!	2013-12-31	0.1	0	#NULL!	1	0	0	0	0	1	1	1	0	0	0	0	#NULL!
2006-08-28	2006	1942-12-15	1	63.7	2	2	1450	1	0	#NULL!	2013-12-31	7.34	0	#NULL!	1	0	0	0	0	0	1	0	0	0	0	0	#NULL!
2004-01-25	2004	1940-05-15	1	63.7	1	1	1479	0	1	2005-01-03	2005-01-03	0.94	0	#NULL!	1	0	0	0	0	0	0	0	0	0	0	0	1
2000-06-26	2000	1936-10-15	1	63.7	1	2	148	0	1	2001-04-14	2001-04-14	0.8	0	#NULL!	1	0	0	0	0	0	0	0	1	0	0	0	1
2004-05-28	2004	1940-09-15	1	63.7	1	2	1419	1	0	#NULL!	2013-12-31	9.59	0	#NULL!	0	0	0	0	0	1	0	1	0	0	0	0	#NULL!
2009-08-25	2009	1945-12-15	1	63.69	3	2	1479	0	0	#NULL!	2013-12-31	4.35	0	#NULL!	1	0	0	0	0	0	0	0	1	0	0	0	#NULL!
2012-10-23	2012	1949-02-15	1	63.69	3	2	1489	0	1	2013-07-04	2013-07-04	0.7	1	2013-05-25	1	0	0	0	0	0	1	0	0	0	0	0	1
2010-12-21	2010	1947-04-15	0	63.69	2	3	1478	0	0	#NULL!	2013-12-31	3.03	0	#NULL!	1	0	0	0	0	1	0	1	0	0	0	0	#NULL!
2005-07-25	2005	1941-11-15	0	63.69	1	2	1450	1	0	#NULL!	2013-12-31	8.44	0	#NULL!	0	0	0	0	0	1	0	0	0	0	0	0	#NULL!
2007-04-25	2007	1943-08-15	1	63.69	1	2	1439	1	1	2009-10-01	2009-10-01	2.44	0	#NULL!	0	0	0	0	0	0	0	0	0	0	0	0	2
2005-11-22	2005	1942-03-15	1	63.69	1	2	1412	1	0	#NULL!	2013-12-12	8.05	0	#NULL!	0	0	0	0	0	1	0	0	0	0	0	0	#NULL!
2010-06-21	2010	1946-10-15	0	63.68	4	2	1479	0	0	#NULL!	2013-12-31	3.53	1	2010-11-16	1	0	0	0	0	0	0	0	1	0	0	0	#NULL!
2009-10-22	2009	1946-02-15	1	63.68	3	3	1479	0	0	#NULL!	2013-12-31	4.19	0	#NULL!	1	0	0	0	0	1	1	0	0	0	0	0	#NULL!
2005-09-19	2005	1942-01-15	1	63.68	3	1	1460	0	0	#NULL!	2013-12-31	8.28	0	#NULL!	1	0	0	0	0	0	0	0	0	0	0	0	#NULL!
2011-06-21	2011	1947-10-15	1	63.68	3	1	1489	0	1	2011-08-26	2011-08-26	0.18	0	#NULL!	1	0	0	0	0	1	1	1	0	0	0	0	0
2001-12-19	2001	1938-04-15	0	63.68	2	3	1412	1	1	2012-12-18	2012-12-18	11	0	#NULL!	0	0	0	0	0	0	0	0	0	0	0	0	11
2002-03-21	2002	1938-07-15	1	63.68	2	1	1489	0	1	2002-09-26	2002-09-26	0.52	0	#NULL!	0	0	0	0	0	0	1	0	0	0	0	0	1
2008-10-20	2008	1945-02-15	1	63.68	2	2	1431	1	1	2011-09-17	2011-09-17	2.91	0	#NULL!	0	0	0	0	0	0	1	1	0	0	0	0	3
2007-01-18	2007	1943-05-15	1	63.68	1	3	1431	1	1	2007-05-08	2007-05-08	0.3	0	#NULL!	1	0	0	0	0	1	1	0	1	1	0	0	0
2008-04-21	2008	1944-08-15	1	63.68	1	3	1481	0	1	2008-11-28	2008-11-28	0.61	0	#NULL!	1	0	0	0	0	1	1	0	0	0	0	0	1
2011-03-21	2011	1947-07-15	1	63.68	1	2	1479	0	1	2012-03-13	2012-03-13	0.98	0	#NULL!	0	0	0	0	0	1	0	0	0	0	0	0	1
2000-02-15	2000	1936-06-15	0	63.67	4	1	1479	0	1	2000-07-24	2000-07-24	0.44	0	#NULL!	1	0	0	0	0	0	1	0	0	0	0	0	0
2000-07-18	2000	1936-11-15	1	63.67	3	2	1479	0	1	2001-04-29	2001-04-29	0.78	0	#NULL!	1	0	0	0	0	0	0	0	0	0	0	0	1
2005-04-15	2005	1941-08-15	1	63.67	3	2	147	0	0	#NULL!	2013-12-31	8.71	0	#NULL!	1	0	0	0	0	0	0	0	0	0	0	0	#NULL!
2011-09-15	2011	1948-01-15	1	63.67	3	3	1450	1	0	#NULL!	2013-12-31	2.29	0	#NULL!	0	0	0	0	0	0	0	0	0	0	0	0	#NULL!
2007-07-19	2007	1943-11-15	1	63.67	2	1	1412	1	1	2011-07-30	2011-07-30	4.03	0	#NULL!	0	0	0	0	0	0	0	0	0	1	0	0	4
2009-03-16	2009	1945-07-15	1	63.67	2	2	1479	0	1	2011-01-21	2011-01-21	1.85	0	#NULL!	1	0	0	0	0	1	1	0	1	0	0	0	2
2003-12-15	2003	1940-04-15	1	63.67	2	2	1459	1	0	#NULL!	2013-12-31	10.05	0	#NULL!	0	0	0	0	0	1	0	0	0	0	0	0	#NULL!
2009-06-18	2009	1945-10-15	1	63.67	2	1	1460	0	0	#NULL!	2013-12-31	4.54	0	#NULL!	1	0	0	0	0	0	0	0	0	0	0	0	#NULL!
2001-11-14	2001	1938-03-15	1	63.67	2	1	1489	0	1	2003-10-05	2003-10-05	1.89	0	#NULL!	1	0	0	0	0	0	1	0	0	0	0	0	2
2012-11-15	2012	1949-03-15	0	63.67	1	2	1439	1	0	#NULL!	2013-12-31	1.13	0	#NULL!	0	1	0	0	0	1	1	1	0	1	0	0	#NULL!
2009-06-11	2009	1945-10-15	1	63.66	4	3	1489	0	1	2009-12-03	2009-12-03	0.48	0	#NULL!	1	0	0	0	0	0	1	0	1	0	0	0	0
2004-12-10	2004	1941-04-15	1	63.66	3	3	1479	0	0	#NULL!	2013-12-31	9.06	0	#NULL!	0	0	0	0	0	0	1	0	0	0	0	0	#NULL!
2004-02-10	2004	1940-06-15	1	63.66	3	1	1619	0	0	#NULL!	2013-12-15	9.85	0	#NULL!	0	0	0	0	0	0	0	0	0	0	0	0	#NULL!
2004-06-14	2004	1940-10-15	1	63.66	2	2	1453	1	1	2006-08-13	2006-08-13	2.16	0	#NULL!	1	0	0	0	0	0	0	0	0	0	0	0	2
2004-10-14	2004	1941-02-15	1	63.66	1	2	1471	0	1	2012-01-16	2012-01-16	7.26	0	#NULL!	1	0	0	0	0	1	1	1	1	0	0	0	7
2003-07-14	2003	1939-11-15	1	63.66	1	1	1610	0	1	2006-03-27	2006-03-27	2.7	0	#NULL!	0	0	0	0	0	0	0	0	1	0	0	0	3
2005-05-15	2005	1941-09-15	0	63.66	1	1	1479	0	1	2010-12-09	2010-12-09	5.57	0	#NULL!	1	0	0	0	0	0	1	1	1	0	0	0	6
2003-09-14	2003	1940-01-15	1	63.66	1	1	1460	0	1	2013-08-07	2013-08-07	9.9	0	#NULL!	1	1	0	0	0	0	0	0	0	0	0	0	10
2012-02-07	2012	1948-06-15	1	63.65	3	3	1489	0	1	2012-11-30	2012-11-30	0.81	0	#NULL!	1	0	0	0	0	0	0	1	0	0	0	0	1
2000-03-10	2000	1936-07-15	1	63.65	3	2	1460	0	1	2000-07-18	2000-07-18	0.36	0	#NULL!	0	0	0	0	0	0	0	0	0	0	0	0	0
2004-05-10	2004	1940-09-15	1	63.65	2	2	1419	1	1	2004-12-09	2004-12-09	0.58	0	#NULL!	0	1	0	0	0	1	1	0	1	0	0	0	1
2008-06-10	2008	1944-10-15	1	63.65	2	1	1489	0	1	2012-01-06	2012-01-06	3.57	0	#NULL!	0	0	0	1	0	0	1	0	0	1	0	0	4
2004-10-11	2004	1941-02-15	1	63.65	2	1	1439	1	1	2004-11-15	2004-11-15	0.1	0	#NULL!	1	1	0	0	0	0	1	1	0	0	0	1	0
2011-02-08	2011	1947-06-15	1	63.65	1	1	1412	1	0	#NULL!	2013-12-31	2.89	0	#NULL!	0	1	0	0	0	1	1	1	0	0	0	1	#NULL!
2011-03-10	2011	1947-07-15	1	63.65	1	1	1439	1	0	#NULL!	2013-12-31	2.81	0	#NULL!	1	0	0	0	0	0	1	0	0	0	0	0	#NULL!
2012-10-09	2012	1949-02-15	1	63.65	1	3	1419	1	0	#NULL!	2013-12-31	1.23	0	#NULL!	0	0	0	0	0	0	1	1	0	0	0	0	#NULL!
2009-06-09	2009	1945-10-15	1	63.65	1	3	1479	0	0	#NULL!	2013-12-31	4.56	0	#NULL!	1	0	0	0	0	0	1	0	0	0	0	0	#NULL!
2007-07-09	2007	1943-11-15	1	63.65	1	2	1460	0	1	2009-06-06	2009-06-06	1.91	0	#NULL!	0	0	0	0	0	0	1	0	0	0	0	0	2
2013-08-06	2013	1949-12-15	1	63.64	3	2	1459	1	0	#NULL!	2013-12-31	0.4	1	2013-09-04	1	1	0	0	0	0	1	0	0	1	0	0	#NULL!
2010-10-06	2010	1947-02-15	1	63.64	3	2	1412	1	0	#NULL!	2013-12-31	3.24	0	#NULL!	1	0	0	0	0	0	1	0	0	0	0	0	#NULL!
2004-05-05	2004	1940-09-15	1	63.64	2	1	1479	0	0	#NULL!	2005-11-07	1.51	0	#NULL!	1	0	0	0	0	0	1	1	1	0	0	0	#NULL!
2010-05-07	2010	1946-09-15	1	63.64	2	1	1479	0	0	#NULL!	2013-12-31	3.65	0	#NULL!	0	0	0	0	0	0	1	1	0	0	0	0	#NULL!
2005-12-06	2005	1942-04-15	1	63.64	2	2	1469	0	1	2008-05-08	2008-05-08	2.42	0	#NULL!	1	0	0	0	0	0	1	1	0	0	0	1	2
2002-06-04	2002	1938-10-15	1	63.64	1	2	1479	0	1	2009-02-06	2009-02-06	6.68	0	#NULL!	1	0	0	0	0	0	0	0	0	0	0	0	7
2002-08-06	2002	1938-12-15	1	63.64	1	1	1450	1	0	#NULL!	2013-12-31	11.4	0	#NULL!	0	1	0	0	0	0	1	0	0	0	0	0	#NULL!
2005-06-06	2005	1941-10-15	0	63.64	1	3	1619	0	1	2012-08-04	2012-08-04	7.16	0	#NULL!	0	0	0	0	0	1	1	0	0	0	0	0	7
2007-06-06	2007	1943-10-15	1	63.64	1	3	1489	0	1	2008-02-04	2008-02-04	0.67	0	#NULL!	1	0	0	0	0	0	0	0	0	0	0	0	1
2008-12-03	2008	1945-04-15	0	63.64	1	2	1438	1	1	2009-10-11	2009-10-11	0.85	1	2009-08-06	1	0	0	0	0	0	1	1	1	0	0	1	1
2012-04-05	2012	1948-08-15	1	63.64	1	3	1412	1	0	#NULL!	2013-12-31	1.74	0	#NULL!	1	0	0	0	0	0	1	0	1	0	0	0	#NULL!
2006-04-03	2006	1942-08-15	0	63.63	4	1	1489	0	1	2006-06-26	2006-06-26	0.23	0	#NULL!	0	0	0	0	0	0	0	0	1	0	1	0	0
2007-03-01	2007	1943-07-15	1	63.63	3	2	1412	1	1	2009-08-09	2009-08-09	2.44	0	#NULL!	0	0	0	0	0	0	1	0	0	0	0	0	2
2006-10-02	2006	1943-02-15	1	63.63	3	2	1459	1	0	#NULL!	2013-12-31	7.25	0	#NULL!	0	1	0	1	0	1	1	0	0	0	0	0	#NULL!
2010-06-01	2010	1946-10-15	1	63.63	3	1	1460	0	1	2010-07-31	2010-07-31	0.16	0	#NULL!	1	0	0	0	0	0	1	0	1	1	0	0	0
2008-10-03	2008	1945-02-15	0	63.63	3	2	1420	1	0	#NULL!	2013-12-31	5.24	0	#NULL!	0	0	0	0	0	0	1	0	0	0	0	0	#NULL!
2011-08-03	2011	1947-12-15	1	63.63	2	1	1464	0	1	2012-10-07	2012-10-07	1.18	0	#NULL!	1	0	0	0	0	0	0	1	0	0	0	0	1
2010-01-01	2010	1946-05-15	1	63.63	2	2	1481	0	1	2011-03-25	2011-03-25	1.23	0	#NULL!	0	0	0	0	0	1	0	1	1	0	0	0	1
2005-06-02	2005	1941-10-15	1	63.63	1	3	141	1	1	2006-04-07	2006-04-07	0.85	0	#NULL!	0	1	0	0	0	1	1	1	1	0	0	0	1
2001-05-02	2001	1937-09-15	0	63.63	1	2	1479	0	0	#NULL!	2013-12-31	12.67	0	#NULL!	0	0	0	0	0	0	0	0	0	0	0	0	#NULL!
2011-11-01	2011	1948-03-15	0	63.63	1	2	1619	0	0	#NULL!	2013-12-31	2.17	0	#NULL!	1	0	0	0	0	1	1	1	1	1	0	0	#NULL!
2007-09-03	2007	1944-01-15	1	63.63	1	3	1610	0	1	2010-10-10	2010-10-10	3.1	0	#NULL!	1	0	0	0	0	0	0	0	0	0	0	0	3
2012-03-28	2012	1948-08-15	1	63.62	3	3	1480	0	0	#NULL!	2013-12-31	1.76	0	#NULL!	1	1	0	1	1	1	1	1	1	0	0	0	#NULL!
2011-04-28	2011	1947-09-15	1	63.62	3	3	1459	1	0	#NULL!	2013-12-31	2.68	0	#NULL!	1	0	0	0	0	0	0	0	0	0	0	0	#NULL!
2000-05-01	2000	1936-09-15	1	63.62	3	2	1489	0	1	2004-12-18	2004-12-18	4.63	0	#NULL!	0	0	0	0	0	1	0	0	0	0	0	0	5
2005-03-31	2005	1941-08-15	1	63.62	2	2	1450	1	1	2006-06-01	2006-06-01	1.17	0	#NULL!	1	0	0	0	0	0	1	0	0	0	0	0	1
2010-04-28	2010	1946-09-15	1	63.62	2	2	1469	0	1	2011-10-09	2011-10-09	1.45	0	#NULL!	1	0	0	0	0	0	0	0	0	0	0	0	1
2011-11-30	2011	1948-04-15	1	63.62	2	2	1489	0	0	#NULL!	2013-12-31	2.09	0	#NULL!	1	0	0	0	0	0	1	0	1	0	0	0	#NULL!
2012-11-27	2012	1949-04-15	1	63.62	1	2	1450	1	0	#NULL!	2013-12-31	1.09	0	#NULL!	0	1	0	0	0	0	1	0	0	0	0	0	#NULL!
2009-02-25	2009	1945-07-15	1	63.62	1	2	1489	0	1	2009-07-30	2009-07-30	0.42	0	#NULL!	0	0	0	0	0	0	1	0	0	0	0	1	0
2004-08-26	2004	1941-01-15	1	63.61	3	2	1479	0	1	2009-11-26	2009-11-26	5.25	0	#NULL!	0	0	0	0	0	0	0	0	0	0	0	0	5
2013-03-26	2013	1949-08-15	1	63.61	3	2	1450	1	1	2013-10-25	2013-10-25	0.58	0	#NULL!	1	1	0	0	0	1	1	1	0	0	0	0	1
2008-06-24	2008	1944-11-15	1	63.61	2	2	1479	0	1	2010-02-13	2010-02-13	1.64	0	#NULL!	1	1	0	0	0	1	1	0	0	0	0	0	2
2004-08-26	2004	1941-01-15	1	63.61	2	1	1460	0	0	#NULL!	2013-12-31	9.35	0	#NULL!	1	1	0	0	0	0	0	1	0	0	0	0	#NULL!
2010-09-27	2010	1947-02-15	1	63.61	1	2	1439	1	0	#NULL!	2013-12-31	3.26	0	#NULL!	0	0	0	0	0	0	1	1	0	0	0	0	#NULL!
2000-08-21	2000	1937-01-15	1	63.6	3	2	1460	0	1	2005-04-04	2005-04-04	4.62	0	#NULL!	1	0	0	0	0	0	1	1	0	0	0	0	5
2012-11-19	2012	1949-04-15	1	63.6	3	2	1420	1	0	#NULL!	2013-12-31	1.11	0	#NULL!	0	0	0	0	0	0	0	0	0	0	0	0	#NULL!
2005-03-22	2005	1941-08-15	1	63.6	1	2	1419	1	1	2006-02-05	2006-02-05	0.88	0	#NULL!	1	0	0	0	0	0	1	1	0	0	0	0	1
2004-04-22	2004	1940-09-15	1	63.6	1	1	1489	0	0	#NULL!	2005-03-10	0.88	0	#NULL!	0	0	0	0	0	1	0	1	0	0	0	1	#NULL!
2009-07-19	2009	1945-12-15	1	63.59	4	2	1460	0	1	2010-04-02	2010-04-02	0.7	0	#NULL!	1	1	0	0	1	0	1	0	1	1	0	0	1
2009-11-17	2009	1946-04-15	1	63.59	3	2	1459	1	0	#NULL!	2013-12-31	4.12	0	#NULL!	1	0	0	0	0	0	0	0	0	0	0	0	#NULL!
2000-12-15	2000	1937-05-15	1	63.59	2	2	1489	0	1	2001-05-03	2001-05-03	0.38	0	#NULL!	0	0	0	0	0	0	1	0	0	0	0	0	0
2009-08-17	2009	1946-01-15	1	63.59	2	2	1479	0	0	#NULL!	2013-12-31	4.37	0	#NULL!	1	1	0	0	0	0	1	1	1	1	0	0	#NULL!
2007-04-19	2007	1943-09-15	0	63.59	2	1	1479	0	1	2008-08-04	2008-08-04	1.3	0	#NULL!	0	1	0	0	0	1	1	0	0	0	0	0	1
2008-03-19	2008	1944-08-15	1	63.59	2	2	1459	1	1	2010-01-10	2010-01-10	1.81	0	#NULL!	0	0	0	0	0	0	0	0	0	0	0	0	2
2011-05-17	2011	1947-10-15	1	63.59	1	3	1439	1	1	2013-02-25	2013-02-25	1.78	0	#NULL!	1	0	0	0	0	1	0	1	0	1	0	0	2
2000-02-11	2000	1936-07-15	0	63.58	4	1	1456	1	1	2000-06-19	2000-06-19	0.35	0	#NULL!	1	0	0	0	0	0	0	1	0	0	0	0	0
2009-10-14	2009	1946-03-15	1	63.58	3	2	1619	0	1	2009-12-05	2009-12-05	0.14	0	#NULL!	0	1	0	0	0	1	1	1	1	0	0	0	0
2009-01-13	2009	1945-06-15	1	63.58	3	2	1479	0	0	#NULL!	2013-12-31	4.96	0	#NULL!	0	0	0	0	0	0	0	0	0	0	0	0	#NULL!
2012-03-13	2012	1948-08-15	1	63.58	3	2	1450	1	1	2012-07-24	2012-07-24	0.36	0	#NULL!	1	0	0	0	0	0	1	0	0	0	0	0	0
2009-11-12	2009	1946-04-15	1	63.58	2	2	1489	0	1	2010-11-07	2010-11-07	0.99	0	#NULL!	1	0	0	0	0	0	0	0	0	0	0	0	1
2012-06-14	2012	1948-11-15	1	63.58	2	1	1456	1	0	#NULL!	2013-12-31	1.55	0	#NULL!	1	0	0	0	0	0	1	0	0	0	0	0	#NULL!
2012-11-12	2012	1949-04-15	1	63.58	2	3	1450	1	0	#NULL!	2013-12-31	1.13	1	2013-01-23	0	0	0	1	0	0	0	1	1	1	0	1	#NULL!
2002-10-11	2002	1939-03-15	1	63.58	2	2	1479	0	1	2006-08-17	2006-08-17	3.85	0	#NULL!	1	0	0	0	0	0	0	0	0	0	0	0	4
2002-09-13	2002	1939-02-15	1	63.58	2	2	1450	1	1	2009-11-27	2009-11-27	7.21	0	#NULL!	0	0	0	0	0	0	1	0	1	0	0	0	7
2002-04-16	2002	1938-09-15	1	63.58	2	2	1449	1	0	#NULL!	2013-12-31	11.71	0	#NULL!	0	1	0	0	0	1	1	0	0	0	0	0	#NULL!
2011-04-15	2011	1947-09-15	1	63.58	1	1	1619	0	1	2012-01-25	2012-01-25	0.78	0	#NULL!	1	0	0	0	0	1	0	0	0	0	0	0	1
2006-03-16	2006	1942-08-15	1	63.58	1	3	1450	1	1	2006-06-29	2006-06-29	0.29	0	#NULL!	1	0	0	0	0	0	0	0	0	0	0	0	0
2006-03-13	2006	1942-08-15	1	63.58	1	1	1489	0	0	#NULL!	2013-12-31	7.8	0	#NULL!	1	0	0	0	0	0	1	0	0	0	0	0	#NULL!
2010-05-10	2010	1946-10-15	1	63.57	3	2	1441	1	0	#NULL!	2013-12-31	3.64	0	#NULL!	1	0	0	0	0	0	0	0	0	0	0	1	#NULL!
2000-05-12	2000	1936-10-15	1	63.57	3	1	1412	1	1	2000-12-06	2000-12-06	0.57	0	#NULL!	1	0	0	0	0	0	0	0	0	0	0	0	1
2007-07-12	2007	1943-12-15	1	63.57	1	3	1479	0	1	2008-08-07	2008-08-07	1.07	0	#NULL!	1	0	0	0	0	0	1	0	0	0	0	0	1
2012-10-09	2012	1949-03-15	1	63.57	1	2	1479	0	0	#NULL!	2013-12-31	1.23	0	#NULL!	1	0	0	0	0	0	1	0	1	0	0	0	#NULL!
2011-11-09	2011	1948-04-15	1	63.57	1	3	1460	0	0	#NULL!	2013-12-31	2.14	0	#NULL!	1	0	0	0	0	1	0	1	0	1	0	0	#NULL!
2000-01-05	2000	1936-06-15	0	63.56	4	1	1459	1	1	2002-11-16	2002-11-16	2.86	0	#NULL!	0	0	0	0	0	0	0	0	0	0	0	1	3
2005-09-06	2005	1942-02-15	1	63.56	3	3	1460	0	0	#NULL!	2013-12-31	8.32	0	#NULL!	1	0	0	0	0	0	0	0	0	0	0	0	#NULL!
2009-11-06	2009	1946-04-15	1	63.56	3	1	1450	1	0	#NULL!	2013-12-31	4.15	0	#NULL!	1	0	0	0	0	0	0	0	0	0	0	0	#NULL!
2009-08-07	2009	1946-01-15	1	63.56	3	3	1439	1	1	2010-10-12	2010-10-12	1.18	0	#NULL!	0	1	0	0	0	0	1	0	0	0	0	0	1
2012-11-06	2012	1949-04-15	1	63.56	3	2	1460	0	0	#NULL!	2013-12-31	1.15	0	#NULL!	1	0	0	0	0	0	0	0	0	0	0	0	#NULL!
2009-01-05	2009	1945-06-15	1	63.56	2	3	1430	1	1	2012-02-12	2012-02-12	3.1	0	#NULL!	1	0	0	0	0	1	0	0	0	0	0	1	3
2007-02-05	2007	1943-07-15	1	63.56	2	3	1450	1	0	#NULL!	2013-12-31	6.9	0	#NULL!	1	0	0	0	0	0	1	0	0	0	0	0	#NULL!
2004-09-09	2004	1941-02-15	1	63.56	2	3	1460	0	1	2012-10-24	2012-10-24	8.12	0	#NULL!	1	0	0	0	0	0	0	0	0	0	0	0	8
2005-05-09	2005	1941-10-15	0	63.56	1	1	1419	1	0	#NULL!	2005-08-29	0.31	0	#NULL!	0	0	0	0	0	1	1	1	1	0	0	0	#NULL!
2000-04-05	2000	1936-09-15	1	63.55	3	2	1480	0	1	2000-12-04	2000-12-04	0.67	0	#NULL!	1	0	0	0	0	0	0	0	0	0	0	0	1
2002-07-03	2002	1938-12-15	1	63.55	3	2	1419	1	1	2004-03-04	2004-03-04	1.67	1	2003-09-01	1	0	0	0	0	0	0	0	0	0	0	0	2
2003-09-05	2003	1940-02-15	1	63.55	3	2	1479	0	1	2010-09-07	2010-09-07	7.01	0	#NULL!	0	0	0	0	0	0	1	0	0	0	0	0	7
2005-06-02	2005	1941-11-15	1	63.55	3	1	1456	1	1	2011-07-22	2011-07-22	6.14	0	#NULL!	1	0	0	0	0	0	0	0	0	0	0	0	6
2012-09-04	2012	1949-02-15	1	63.55	3	2	1479	0	0	#NULL!	2013-12-31	1.32	0	#NULL!	1	0	0	0	0	0	1	0	1	0	0	0	#NULL!
2010-12-01	2010	1947-05-15	1	63.55	3	2	1419	1	0	#NULL!	2013-12-31	3.08	0	#NULL!	1	1	0	0	0	0	1	1	0	0	0	0	#NULL!
2009-11-02	2009	1946-04-15	1	63.55	3	2	1460	0	1	2010-12-06	2010-12-06	1.09	0	#NULL!	1	1	0	0	0	1	1	1	1	0	0	0	1
2003-01-02	2003	1939-06-15	1	63.55	2	2	1489	0	1	2012-08-11	2012-08-11	9.61	0	#NULL!	1	0	0	0	0	0	1	0	0	0	0	0	10
2004-10-03	2004	1941-03-15	1	63.55	1	2	1459	1	1	2013-12-08	2013-12-08	9.18	0	#NULL!	1	0	0	0	0	1	0	0	0	0	0	1	9
2009-02-02	2009	1945-07-15	1	63.55	1	3	1410	1	0	#NULL!	2013-12-31	4.91	1	2009-07-08	1	0	0	0	0	0	1	0	0	0	0	0	#NULL!
2013-09-30	2013	1950-03-15	1	63.55	1	1	1459	1	0	#NULL!	2013-12-31	0.25	0	#NULL!	1	1	0	0	0	0	1	0	0	0	0	0	#NULL!
2008-09-03	2008	1945-02-15	1	63.55	1	1	1481	0	1	2008-11-20	2008-11-20	0.21	0	#NULL!	1	0	0	0	0	0	0	0	0	0	0	0	0
2010-04-05	2010	1946-09-15	1	63.55	1	2	1450	1	0	#NULL!	2013-12-31	3.74	0	#NULL!	1	0	0	0	0	0	0	0	0	0	0	0	#NULL!
2001-10-03	2001	1938-03-15	1	63.55	1	2	1479	0	1	2004-04-04	2004-04-04	2.5	0	#NULL!	1	0	0	0	0	0	0	0	0	0	0	0	3
2002-10-28	2002	1939-04-15	1	63.54	3	1	1611	0	1	2004-02-08	2004-02-08	1.28	0	#NULL!	1	0	0	0	0	0	0	0	0	0	0	0	1
2001-05-30	2001	1937-11-15	1	63.54	2	2	1430	1	0	#NULL!	2013-12-31	12.59	0	#NULL!	0	0	0	0	0	0	0	0	0	0	0	1	#NULL!
2013-08-01	2013	1950-01-15	1	63.54	2	2	1431	1	1	2013-12-25	2013-12-25	0.4	0	#NULL!	1	0	0	0	0	1	1	0	0	0	0	0	0
2005-05-30	2005	1941-11-15	1	63.54	2	3	1479	0	0	#NULL!	2013-12-31	8.59	0	#NULL!	1	0	0	0	0	1	0	0	1	0	0	0	#NULL!
2000-08-31	2000	1937-02-15	1	63.54	1	2	1489	0	1	2001-01-12	2001-01-12	0.37	0	#NULL!	0	0	0	0	0	0	0	0	0	0	0	0	0
2009-06-01	2009	1945-11-15	1	63.54	1	2	1459	1	1	2010-01-26	2010-01-26	0.65	0	#NULL!	1	0	0	0	0	0	0	0	0	0	0	0	1
2012-12-26	2012	1949-06-15	1	63.53	3	2	1450	1	0	#NULL!	2013-12-31	1.01	0	#NULL!	0	0	0	0	0	0	0	0	0	0	0	0	#NULL!
2002-07-29	2002	1939-01-15	1	63.53	3	2	1619	0	1	2004-06-24	2004-06-24	1.91	0	#NULL!	0	0	0	0	0	1	0	0	0	0	0	0	2
2010-04-25	2010	1946-10-15	1	63.53	3	1	1489	0	0	#NULL!	2013-12-31	3.69	0	#NULL!	1	0	0	0	0	0	0	0	0	0	0	1	#NULL!
2007-01-24	2007	1943-07-15	1	63.53	3	2	1450	1	1	2009-12-01	2009-12-01	2.85	0	#NULL!	0	0	0	0	0	0	0	0	0	0	0	0	3
2007-05-28	2007	1943-11-15	1	63.53	2	1	1479	0	0	#NULL!	2013-12-31	6.6	0	#NULL!	1	0	0	0	0	0	0	0	0	0	0	0	#NULL!
2006-09-25	2006	1943-03-15	0	63.53	2	2	1479	0	0	#NULL!	2013-12-31	7.27	0	#NULL!	0	1	0	0	0	0	0	0	1	0	0	0	#NULL!
2011-02-24	2011	1947-08-15	1	63.53	1	2	1479	0	0	#NULL!	2013-12-31	2.85	0	#NULL!	1	0	0	0	0	0	1	0	1	0	0	0	#NULL!
2007-06-27	2007	1943-12-15	1	63.53	1	1	1619	0	1	2008-10-30	2008-10-30	1.34	0	#NULL!	1	0	0	0	0	0	0	0	0	0	0	0	1
2012-06-25	2012	1948-12-15	1	63.53	1	2	1469	0	0	#NULL!	2013-12-31	1.52	0	#NULL!	1	0	0	0	0	0	0	0	0	0	0	0	#NULL!
2002-04-28	2002	1938-10-15	1	63.53	1	3	1450	1	1	2005-03-20	2005-03-20	2.89	0	#NULL!	1	0	0	0	0	0	0	0	0	0	0	0	3
2012-03-25	2012	1948-09-15	1	63.52	3	2	1489	0	0	#NULL!	2013-12-31	1.77	0	#NULL!	1	0	0	0	0	0	0	0	0	0	0	0	#NULL!
2005-04-21	2005	1941-10-15	1	63.52	3	2	1410	1	1	2006-03-24	2006-03-24	0.92	0	#NULL!	0	0	0	0	0	0	1	0	0	0	0	0	1
2007-02-21	2007	1943-08-15	1	63.52	3	1	1489	0	1	2007-10-15	2007-10-15	0.65	0	#NULL!	1	0	0	0	0	0	0	0	0	0	0	0	1
2005-07-25	2005	1942-01-15	1	63.52	3	2	1412	1	1	2007-03-24	2007-03-24	1.66	0	#NULL!	0	0	0	0	0	1	0	0	0	0	0	1	2
2012-05-23	2012	1948-11-15	1	63.52	3	3	1431	1	1	2013-07-18	2013-07-18	1.15	0	#NULL!	1	0	0	0	0	0	0	0	0	0	0	0	1
2012-07-23	2012	1949-01-15	1	63.52	3	2	1452	1	1	2012-10-16	2012-10-16	0.23	0	#NULL!	1	0	0	0	0	1	1	0	0	0	0	0	0
2013-02-20	2013	1949-08-15	1	63.52	2	3	1431	1	1	2013-05-14	2013-05-14	0.23	0	#NULL!	1	0	0	0	0	0	1	1	0	0	0	0	0
2008-03-24	2008	1944-09-15	1	63.52	1	3	1450	1	1	2011-10-14	2011-10-14	3.56	0	#NULL!	1	0	0	0	0	0	0	0	0	0	0	0	4
2004-11-22	2004	1941-05-15	1	63.52	1	3	1488	0	1	2006-09-11	2006-09-11	1.8	0	#NULL!	1	0	0	0	0	0	0	0	0	0	0	0	2
2011-05-25	2011	1947-11-15	1	63.52	1	3	1619	0	0	#NULL!	2013-12-31	2.6	0	#NULL!	1	0	0	0	0	0	0	0	0	0	0	0	#NULL!
2001-02-19	2001	1937-08-15	1	63.52	1	2	1619	0	1	2002-04-19	2002-04-19	1.16	0	#NULL!	1	0	0	0	0	1	1	1	0	0	0	0	1
2007-10-24	2007	1944-04-15	1	63.52	1	2	1459	1	1	2009-10-08	2009-10-08	1.96	0	#NULL!	1	1	0	1	0	0	0	0	0	0	0	1	2
2012-10-17	2012	1949-04-15	1	63.51	3	1	1489	0	1	2013-06-19	2013-06-19	0.67	0	#NULL!	1	0	0	0	0	1	1	0	0	0	0	0	1
2005-10-19	2005	1942-04-15	1	63.51	3	2	1619	0	1	2006-05-20	2006-05-20	0.58	0	#NULL!	1	0	0	0	0	0	1	0	1	0	0	0	1
2006-10-18	2006	1943-04-15	1	63.51	3	2	1412	1	0	#NULL!	2007-09-26	0.94	0	#NULL!	0	1	0	0	0	1	1	1	0	0	0	0	#NULL!
2010-01-18	2010	1946-07-15	1	63.51	3	2	1489	0	1	2012-12-05	2012-12-05	2.88	0	#NULL!	1	0	0	0	0	0	0	0	0	0	0	0	3
2009-02-18	2009	1945-08-15	1	63.51	3	2	1439	1	0	#NULL!	2013-12-31	4.87	0	#NULL!	0	0	0	0	0	0	0	0	0	0	0	0	#NULL!
2008-03-19	2008	1944-09-15	1	63.51	3	2	1466	0	1	2008-11-13	2008-11-13	0.65	1	2008-09-05	1	0	0	0	0	0	0	0	0	0	0	0	1
2004-04-14	2004	1940-10-15	1	63.5	4	1	1460	0	0	#NULL!	2013-12-31	9.71	0	#NULL!	1	0	0	0	0	0	0	0	0	0	0	0	#NULL!
2008-01-13	2008	1944-07-15	1	63.5	4	1	1611	0	0	#NULL!	2013-12-31	5.97	0	#NULL!	1	0	0	0	0	0	0	0	1	0	0	0	#NULL!
2011-05-16	2011	1947-11-15	1	63.5	3	1	1450	1	1	2013-02-08	2013-02-08	1.74	0	#NULL!	1	0	0	0	0	0	0	0	0	0	0	1	2
2011-09-14	2011	1948-03-15	1	63.5	3	1	1420	1	0	#NULL!	2013-12-31	2.3	0	#NULL!	0	0	0	0	0	0	0	0	0	0	0	0	#NULL!
2003-04-14	2003	1939-10-15	0	63.5	3	2	1441	1	1	2004-11-25	2004-11-25	1.62	0	#NULL!	0	0	0	0	0	0	1	0	0	0	0	0	2
2008-12-16	2008	1945-06-15	1	63.5	2	1	1459	1	1	2012-06-28	2012-06-28	3.53	0	#NULL!	0	0	0	1	0	1	0	1	1	1	0	1	4
2007-04-16	2007	1943-10-15	1	63.5	2	3	1469	0	0	#NULL!	2013-12-31	6.71	0	#NULL!	1	0	0	0	0	0	1	0	0	0	0	0	#NULL!
2011-04-16	2011	1947-10-15	1	63.5	2	1	1450	1	0	#NULL!	2013-12-31	2.71	0	#NULL!	1	0	0	0	0	1	1	0	1	0	0	0	#NULL!
2010-03-17	2010	1946-09-15	0	63.5	2	3	1419	1	1	2010-06-23	2010-06-23	0.27	0	#NULL!	1	0	0	0	0	0	1	0	1	1	0	0	0
2010-10-15	2010	1947-04-15	1	63.5	1	2	1450	1	0	#NULL!	2013-12-31	3.21	0	#NULL!	1	0	0	0	0	0	1	0	0	0	0	1	#NULL!
2009-07-16	2009	1946-01-15	1	63.5	1	1	1489	0	1	2010-06-29	2010-06-29	0.95	0	#NULL!	1	1	0	1	0	1	1	1	0	0	0	0	1
2005-09-14	2005	1942-03-15	0	63.5	1	3	1479	0	0	#NULL!	2013-12-31	8.3	1	2005-10-06	1	1	0	0	0	0	1	1	1	1	0	0	#NULL!
2011-07-13	2011	1948-01-15	1	63.49	4	3	1459	1	0	#NULL!	2013-12-31	2.47	0	#NULL!	1	0	0	0	0	0	1	0	0	0	0	0	#NULL!
2009-08-13	2009	1946-02-15	1	63.49	4	2	1481	0	0	#NULL!	2013-12-31	4.38	0	#NULL!	1	0	0	0	0	0	1	0	0	0	0	0	#NULL!
2003-05-14	2003	1939-11-15	1	63.49	3	1	1481	0	1	2004-04-19	2004-04-19	0.93	1	2003-09-16	0	0	0	0	0	0	1	0	0	0	0	0	1
2012-03-11	2012	1948-09-15	1	63.49	2	3	1479	0	1	2013-05-16	2013-05-16	1.18	0	#NULL!	1	0	0	0	0	0	0	0	0	0	0	0	1
2007-02-08	2007	1943-08-15	1	63.49	2	1	1479	0	1	2009-06-23	2009-06-23	2.37	0	#NULL!	1	0	0	0	0	0	0	1	0	0	0	0	2
2009-02-09	2009	1945-08-15	1	63.49	2	2	1459	1	1	2010-06-24	2010-06-24	1.37	0	#NULL!	1	1	0	0	0	0	1	0	0	0	0	0	1
2004-05-11	2004	1940-11-15	0	63.49	1	2	1479	0	1	2005-03-21	2005-03-21	0.86	0	#NULL!	1	0	0	0	0	0	0	0	0	0	0	0	1
2007-12-12	2007	1944-06-15	1	63.49	1	1	1610	0	0	#NULL!	2013-12-31	6.05	0	#NULL!	1	0	0	0	0	0	0	0	0	0	0	0	#NULL!
2004-05-12	2004	1940-11-15	1	63.49	1	1	1459	1	1	2004-07-24	2004-07-24	0.2	0	#NULL!	1	0	0	1	0	1	1	1	1	0	0	0	0
2006-11-08	2006	1943-05-15	1	63.49	1	2	1469	0	1	2013-05-01	2013-05-01	6.48	1	2007-09-03	1	1	0	0	0	0	1	1	0	0	0	0	6
2008-06-09	2008	1944-12-15	1	63.48	3	2	1431	1	1	2008-10-19	2008-10-19	0.36	0	#NULL!	1	0	0	0	0	1	0	0	0	0	0	0	0
2011-12-07	2011	1948-06-15	0	63.48	3	1	1412	1	1	2012-11-11	2012-11-11	0.93	0	#NULL!	1	0	0	0	0	0	0	0	0	0	0	0	1
2013-08-09	2013	1950-02-15	1	63.48	3	3	1450	1	1	2013-12-27	2013-12-27	0.38	0	#NULL!	1	0	0	0	0	0	1	0	0	0	0	1	0
2003-04-07	2003	1939-10-15	1	63.48	2	2	1431	1	1	2009-03-08	2009-03-08	5.92	0	#NULL!	0	0	0	0	0	0	0	0	0	0	0	0	6
2000-08-10	2000	1937-02-15	1	63.48	2	1	1410	1	1	2000-12-06	2000-12-06	0.32	0	#NULL!	0	0	0	1	0	0	0	0	0	0	0	0	0
2009-08-10	2009	1946-02-15	1	63.48	1	3	1450	1	1	2010-06-18	2010-06-18	0.85	0	#NULL!	0	0	0	0	0	0	0	0	0	0	0	0	1
2008-07-08	2008	1945-01-15	1	63.48	1	2	1619	0	0	#NULL!	2013-12-31	5.48	0	#NULL!	0	0	0	0	0	1	1	1	1	0	0	0	#NULL!
2003-05-05	2003	1939-11-15	1	63.47	4	3	1499	0	1	2004-03-06	2004-03-06	0.84	0	#NULL!	0	0	0	0	0	0	0	0	1	0	0	0	1
2012-01-05	2012	1948-07-15	1	63.47	3	1	1489	0	1	2012-09-29	2012-09-29	0.73	0	#NULL!	1	0	0	0	0	0	0	0	0	0	0	0	1
2008-12-04	2008	1945-06-15	1	63.47	3	1	1489	0	0	#NULL!	2013-12-31	5.07	0	#NULL!	1	0	0	0	0	0	1	1	0	0	0	0	#NULL!
2005-01-03	2005	1941-07-15	1	63.47	2	2	1450	1	0	#NULL!	2013-12-31	8.99	0	#NULL!	1	0	0	0	0	1	1	0	0	0	0	0	#NULL!
2012-10-05	2012	1949-04-15	1	63.47	2	2	1472	0	0	#NULL!	2013-12-31	1.24	0	#NULL!	1	0	0	0	0	1	1	1	1	0	0	0	#NULL!
2004-07-05	2004	1941-01-15	1	63.47	2	1	1619	0	0	#NULL!	2013-12-31	9.49	0	#NULL!	0	0	0	0	0	0	0	0	0	0	0	0	#NULL!
2003-01-02	2003	1939-07-15	1	63.47	2	2	1450	1	0	#NULL!	2013-12-31	11	0	#NULL!	0	0	0	0	0	0	1	0	0	0	0	0	#NULL!
2000-05-06	2000	1936-11-15	1	63.47	2	3	1479	0	1	2005-06-19	2005-06-19	5.12	0	#NULL!	1	0	0	0	0	0	0	0	0	0	0	0	5
2002-06-05	2002	1938-12-15	1	63.47	2	2	1619	0	0	#NULL!	2013-12-31	11.57	0	#NULL!	0	0	0	0	0	0	0	0	0	0	0	0	#NULL!
2002-03-04	2002	1938-09-15	1	63.47	1	2	1479	0	1	2008-03-24	2008-03-24	6.06	1	2004-04-22	1	0	0	0	0	0	0	1	0	0	0	0	6
2005-04-06	2005	1941-10-15	1	63.47	1	3	1449	1	0	#NULL!	2013-12-31	8.74	0	#NULL!	1	0	0	0	0	0	0	0	0	0	0	1	#NULL!
2008-09-01	2008	1945-03-15	1	63.47	1	2	1489	0	1	2008-11-23	2008-11-23	0.23	0	#NULL!	1	1	0	1	0	0	0	0	0	0	0	0	0
2007-01-03	2007	1943-07-15	0	63.47	1	1	1419	1	0	#NULL!	2013-12-31	6.99	0	#NULL!	1	0	0	0	0	0	0	0	0	0	0	0	#NULL!
2005-03-07	2005	1941-09-15	1	63.47	1	1	1470	0	0	#NULL!	2013-12-31	8.82	0	#NULL!	1	0	0	0	0	0	0	0	0	0	0	0	#NULL!
2005-10-03	2005	1942-04-15	1	63.47	1	1	1453	1	1	2009-10-05	2009-10-05	4.01	0	#NULL!	1	0	0	0	0	0	0	0	0	0	0	0	4
2012-05-30	2012	1948-12-15	1	63.46	4	2	1479	0	1	2013-09-02	2013-09-02	1.26	0	#NULL!	0	0	0	0	0	1	0	0	0	0	0	0	1
2011-12-01	2011	1948-06-15	1	63.46	3	2	1431	1	1	2012-05-16	2012-05-16	0.46	0	#NULL!	1	1	0	0	0	1	1	1	0	0	0	0	0
2009-08-31	2009	1946-03-15	1	63.46	3	2	1489	0	0	#NULL!	2012-01-06	2.35	0	#NULL!	1	0	0	0	1	0	1	0	0	0	0	0	#NULL!
2010-08-31	2010	1947-03-15	1	63.46	3	1	1419	1	1	2013-02-26	2013-02-26	2.49	1	2011-06-20	1	0	0	0	0	0	0	1	0	0	0	1	2
2012-06-01	2012	1948-12-15	1	63.46	3	2	1619	0	0	#NULL!	2013-12-31	1.58	0	#NULL!	1	0	0	0	0	1	1	1	0	0	0	0	#NULL!
2008-05-01	2008	1944-11-15	1	63.46	3	2	1467	0	0	#NULL!	2013-12-31	5.67	0	#NULL!	0	0	0	0	0	0	0	0	0	0	0	0	#NULL!
2002-10-01	2002	1939-04-15	1	63.46	3	2	1489	0	0	#NULL!	2013-12-31	11.25	0	#NULL!	0	0	0	0	0	0	0	0	0	0	0	0	#NULL!
2012-07-03	2012	1949-01-15	1	63.46	2	2	1439	1	0	#NULL!	2013-12-31	1.49	0	#NULL!	1	0	0	0	0	0	0	0	0	0	0	1	#NULL!
2013-01-28	2013	1949-08-15	1	63.46	2	2	1431	1	1	2013-05-28	2013-05-28	0.33	0	#NULL!	1	0	0	0	0	0	1	1	0	0	0	1	0
2002-10-28	2002	1939-05-15	1	63.46	1	3	1419	1	0	#NULL!	2013-12-31	11.18	0	#NULL!	1	0	0	0	0	0	0	0	0	0	0	0	#NULL!
2001-06-01	2001	1937-12-15	0	63.46	1	3	1479	0	0	#NULL!	2002-04-06	0.85	0	#NULL!	1	0	0	0	0	1	1	0	0	0	0	0	#NULL!
2010-03-30	2010	1946-10-15	0	63.46	1	1	1412	1	1	2010-12-05	2010-12-05	0.68	0	#NULL!	0	0	0	0	0	0	0	0	0	0	0	0	1
2012-05-27	2012	1948-12-15	1	63.45	4	2	1456	1	0	#NULL!	2013-12-31	1.6	0	#NULL!	1	0	0	0	0	0	1	0	0	0	0	1	#NULL!
2009-07-29	2009	1946-02-15	1	63.45	2	2	1479	0	0	#NULL!	2013-12-31	4.42	0	#NULL!	1	0	0	0	0	0	1	0	0	0	0	0	#NULL!
2008-11-26	2008	1945-06-15	1	63.45	2	2	1489	0	1	2010-05-25	2010-05-25	1.49	0	#NULL!	1	0	0	0	0	0	1	0	0	0	0	0	1
2009-09-24	2009	1946-04-15	1	63.44	3	1	1419	1	1	2010-02-15	2010-02-15	0.39	0	#NULL!	1	0	0	0	0	1	1	1	1	1	0	0	0
2009-01-22	2009	1945-08-15	1	63.44	3	2	1431	1	0	#NULL!	2013-12-31	4.94	0	#NULL!	1	0	0	0	0	1	0	0	0	0	0	1	#NULL!
2008-03-24	2008	1944-10-15	1	63.44	3	3	1489	0	1	2008-10-18	2008-10-18	0.57	0	#NULL!	1	0	0	0	0	0	0	0	0	0	0	0	1
2010-01-21	2010	1946-08-15	1	63.44	3	1	1453	1	1	2010-05-13	2010-05-13	0.31	0	#NULL!	1	0	0	0	0	0	1	1	0	0	0	0	0
2011-08-23	2011	1948-03-15	1	63.44	3	3	1450	1	1	2012-06-04	2012-06-04	0.78	0	#NULL!	1	0	0	0	0	0	1	1	0	0	0	1	1
2011-10-24	2011	1948-05-15	1	63.44	1	2	1452	1	0	#NULL!	2013-12-31	2.19	0	#NULL!	1	0	0	0	0	0	0	0	0	0	0	0	#NULL!
2011-07-26	2011	1948-02-15	1	63.44	1	2	1450	1	1	2012-05-04	2012-05-04	0.77	0	#NULL!	0	0	0	0	0	0	0	1	1	0	0	0	1
2006-12-18	2006	1943-07-15	1	63.43	3	3	1419	1	0	#NULL!	2013-12-31	7.04	0	#NULL!	0	0	0	0	0	1	0	1	0	0	0	0	#NULL!
2011-06-21	2011	1948-01-15	1	63.43	3	2	1456	1	0	#NULL!	2013-12-31	2.53	0	#NULL!	1	1	0	0	0	0	1	1	0	0	0	0	#NULL!
2004-09-18	2004	1941-04-15	1	63.43	3	3	1490	0	1	2005-04-25	2005-04-25	0.6	0	#NULL!	1	0	0	0	0	0	1	0	1	0	0	0	1
2011-01-17	2011	1947-08-15	1	63.43	3	1	1460	0	1	2011-03-11	2011-03-11	0.15	0	#NULL!	0	0	0	0	0	0	0	0	0	0	0	0	0
2011-11-21	2011	1948-06-15	1	63.43	3	2	1450	1	0	#NULL!	2013-12-31	2.11	0	#NULL!	0	0	0	0	0	1	0	0	0	0	0	0	#NULL!
2000-06-22	2000	1937-01-15	1	63.43	3	2	1439	1	1	2003-10-14	2003-10-14	3.31	0	#NULL!	1	0	0	0	0	0	0	0	0	0	0	0	3
2002-02-20	2002	1938-09-15	0	63.43	3	1	1421	1	1	2005-06-11	2005-06-11	3.3	0	#NULL!	0	0	0	0	0	0	0	0	0	0	0	0	3
2005-11-17	2005	1942-06-15	1	63.43	2	2	1479	0	0	#NULL!	2013-12-31	8.12	0	#NULL!	1	0	0	0	0	0	0	1	0	0	0	0	#NULL!
2001-05-22	2001	1937-12-15	1	63.43	2	2	1479	0	1	2004-05-07	2004-05-07	2.96	0	#NULL!	0	0	1	0	0	0	0	0	0	0	0	0	3
2012-04-19	2012	1948-11-15	0	63.43	1	2	1479	0	0	#NULL!	2013-12-31	1.7	0	#NULL!	1	0	0	0	0	0	0	0	0	0	0	0	#NULL!
2009-12-17	2009	1946-07-15	1	63.43	1	2	1469	0	0	#NULL!	2013-12-31	4.04	0	#NULL!	1	1	0	0	0	1	1	1	0	0	0	0	#NULL!
2004-05-20	2004	1940-12-15	1	63.43	1	3	1459	1	1	2005-03-22	2005-03-22	0.84	0	#NULL!	0	0	0	0	0	0	0	0	0	0	0	0	1
2012-07-20	2012	1949-02-15	1	63.43	1	1	1479	0	0	#NULL!	2013-12-31	1.45	0	#NULL!	1	0	0	0	1	0	0	0	0	0	0	0	#NULL!
2013-10-14	2013	1950-05-15	1	63.42	4	2	1450	1	0	#NULL!	2013-12-31	0.21	0	#NULL!	0	0	0	0	0	0	0	0	0	0	0	0	#NULL!
2008-07-19	2008	1945-02-15	1	63.42	3	1	1479	0	0	#NULL!	2013-12-31	5.45	0	#NULL!	1	1	0	0	0	0	1	0	1	0	0	0	#NULL!
2000-10-16	2000	1937-05-15	1	63.42	2	2	1452	1	1	2001-05-12	2001-05-12	0.57	1	2001-03-27	0	0	0	0	0	0	0	0	0	0	0	0	1
2006-07-18	2006	1943-02-15	1	63.42	1	3	1611	0	0	#NULL!	2013-12-31	7.46	0	#NULL!	1	0	0	0	0	0	1	0	0	0	0	1	#NULL!
2009-12-14	2009	1946-07-15	1	63.42	1	1	1450	1	0	#NULL!	2013-12-31	4.05	0	#NULL!	1	0	0	0	0	0	1	0	0	0	0	1	#NULL!
2006-04-17	2006	1942-11-15	1	63.42	1	2	143	1	0	#NULL!	2013-12-31	7.71	0	#NULL!	0	0	0	0	0	0	0	0	0	0	0	0	#NULL!
2001-09-10	2001	1938-04-15	1	63.41	3	2	1479	0	0	#NULL!	2013-12-31	12.31	0	#NULL!	0	0	0	0	0	0	0	0	0	0	0	0	#NULL!
2008-08-12	2008	1945-03-15	1	63.41	2	2	1456	1	0	#NULL!	2012-12-04	4.31	0	#NULL!	0	1	0	0	0	0	1	1	0	0	0	0	#NULL!
2009-08-10	2009	1946-03-15	1	63.41	1	2	1441	1	0	#NULL!	2013-12-31	4.39	0	#NULL!	1	0	0	0	1	1	1	0	0	0	0	0	#NULL!
2004-07-14	2004	1941-02-15	1	63.41	1	2	1479	0	0	#NULL!	2013-12-31	9.46	0	#NULL!	1	0	0	0	0	1	1	0	0	0	0	0	#NULL!
2010-07-14	2010	1947-02-15	1	63.41	1	1	1479	0	0	#NULL!	2013-12-31	3.47	0	#NULL!	1	1	0	0	0	1	1	1	1	0	0	0	#NULL!
2009-05-15	2009	1945-12-15	1	63.41	1	3	1419	1	1	2013-09-18	2013-09-18	4.34	0	#NULL!	0	0	0	0	0	1	1	1	0	0	0	1	4
2012-06-11	2012	1949-01-15	1	63.4	3	3	1450	1	1	2012-09-06	2012-09-06	0.24	0	#NULL!	1	1	0	0	0	0	1	0	0	0	0	1	0
2004-06-10	2004	1941-01-15	1	63.4	3	2	1472	0	1	2012-12-21	2012-12-21	8.53	0	#NULL!	1	0	0	0	0	0	1	0	0	0	0	0	9
2011-05-11	2011	1947-12-15	1	63.4	3	1	1479	0	0	#NULL!	2013-12-30	2.64	0	#NULL!	1	0	0	0	0	0	1	1	0	0	0	0	#NULL!
2008-08-08	2008	1945-03-15	1	63.4	3	3	1619	0	1	2009-01-19	2009-01-19	0.45	0	#NULL!	0	0	0	0	0	0	1	0	0	0	0	0	0
2002-05-09	2002	1938-12-15	1	63.4	2	2	1489	0	1	2004-01-18	2004-01-18	1.69	0	#NULL!	1	0	0	0	0	0	0	0	0	0	0	0	2
2010-10-07	2010	1947-05-15	1	63.4	2	2	1428	1	1	2013-11-27	2013-11-27	3.14	0	#NULL!	0	0	0	0	0	0	0	0	0	0	0	0	3
2003-04-11	2003	1939-11-15	1	63.4	2	2	1450	1	1	2003-07-01	2003-07-01	0.22	0	#NULL!	1	0	0	0	0	0	0	0	0	0	0	0	0
2002-01-07	2002	1938-08-15	1	63.4	2	3	145	1	1	2003-09-29	2003-09-29	1.72	0	#NULL!	1	0	0	0	0	1	1	0	0	0	0	0	2
2011-08-09	2011	1948-03-15	1	63.4	1	1	1419	1	0	#NULL!	2013-12-31	2.4	0	#NULL!	0	0	0	0	0	0	1	0	0	0	0	0	#NULL!
2011-02-07	2011	1947-09-15	1	63.4	1	2	1459	1	1	2012-09-15	2012-09-15	1.6	0	#NULL!	0	1	0	1	1	1	1	1	1	1	0	0	2
2008-04-10	2008	1944-11-15	1	63.4	1	2	1479	0	0	#NULL!	2013-12-31	5.72	0	#NULL!	1	0	0	0	0	0	1	0	0	0	0	0	#NULL!
2012-11-05	2012	1949-06-15	1	63.39	3	3	1456	1	1	2013-06-08	2013-06-08	0.59	0	#NULL!	1	0	0	0	0	0	1	0	0	0	0	0	1
2012-09-06	2012	1949-04-15	1	63.39	2	3	1469	0	1	2012-12-08	2012-12-08	0.25	0	#NULL!	1	0	0	0	0	0	0	0	0	0	0	0	0
2010-06-07	2010	1947-01-15	1	63.39	2	2	1419	1	0	#NULL!	2013-12-31	3.57	0	#NULL!	0	0	0	0	0	0	1	0	1	0	0	0	#NULL!
2013-07-08	2013	1950-02-15	1	63.39	2	3	1459	1	0	#NULL!	2013-12-31	0.48	0	#NULL!	1	0	0	0	0	0	0	0	0	0	0	1	#NULL!
2010-12-03	2010	1947-07-15	1	63.39	1	1	1439	1	1	2012-07-30	2012-07-30	1.66	0	#NULL!	0	0	0	0	0	0	0	0	0	0	0	0	2
2010-02-04	2010	1946-09-15	1	63.39	1	3	1479	0	0	#NULL!	2013-12-31	3.9	0	#NULL!	1	0	0	0	0	0	1	1	0	0	0	0	#NULL!
2010-11-04	2010	1947-06-15	1	63.39	1	3	1479	0	0	#NULL!	2013-12-31	3.16	0	#NULL!	1	0	0	0	0	1	1	1	1	0	0	0	#NULL!
2012-09-04	2012	1949-04-15	1	63.39	1	2	1481	0	1	2013-10-20	2013-10-20	1.13	0	#NULL!	1	0	0	0	0	0	0	0	0	0	0	0	1
2003-03-03	2003	1939-10-15	1	63.38	4	3	1450	1	1	2003-12-20	2003-12-20	0.8	0	#NULL!	1	0	0	0	0	1	0	0	0	0	0	0	1
2010-11-30	2010	1947-07-15	1	63.38	3	2	1618	0	0	#NULL!	2013-12-31	3.09	0	#NULL!	1	0	0	0	0	1	1	1	0	0	0	0	#NULL!
2006-04-03	2006	1942-11-15	1	63.38	3	2	1453	1	1	2010-06-17	2010-06-17	4.21	0	#NULL!	1	1	0	0	0	1	1	0	0	0	0	0	4
2010-05-04	2010	1946-12-15	1	63.38	3	2	1450	1	1	2011-02-20	2011-02-20	0.8	0	#NULL!	1	0	0	1	0	1	0	0	0	0	0	1	1
2005-12-02	2005	1942-07-15	1	63.38	3	1	1499	0	1	2012-10-31	2012-10-31	6.91	0	#NULL!	0	0	0	0	0	0	0	0	0	0	0	0	7
2005-06-01	2005	1942-01-15	1	63.38	3	1	1460	0	1	2006-06-02	2006-06-02	1	0	#NULL!	1	0	0	0	0	0	0	0	0	0	0	0	1
2000-03-03	2000	1936-10-15	1	63.38	3	2	147	0	1	2005-12-23	2005-12-23	5.81	0	#NULL!	1	1	0	0	0	0	1	0	0	0	0	0	6
2000-07-05	2000	1937-02-15	1	63.38	2	1	1489	0	1	2009-03-05	2009-03-05	8.67	0	#NULL!	1	0	0	0	0	0	0	0	0	0	0	0	9
2006-10-01	2006	1943-05-15	1	63.38	2	1	1412	1	1	2009-03-13	2009-03-13	2.45	0	#NULL!	1	0	0	0	0	0	1	0	1	0	0	0	2
2012-02-02	2012	1948-09-15	0	63.38	2	2	1419	1	0	#NULL!	2013-12-31	1.91	0	#NULL!	0	0	0	0	0	0	0	1	1	0	0	0	#NULL!
2007-10-01	2007	1944-05-15	0	63.38	2	2	1459	1	0	#NULL!	2013-12-31	6.25	1	2008-08-27	0	0	0	0	0	0	1	0	0	0	0	0	#NULL!
2010-12-01	2010	1947-07-15	1	63.38	1	3	1460	0	0	#NULL!	2013-12-31	3.08	0	#NULL!	1	0	0	0	0	0	1	0	0	0	0	0	#NULL!
2010-03-01	2010	1946-10-15	1	63.38	1	3	1459	1	1	2011-07-16	2011-07-16	1.37	0	#NULL!	0	0	0	0	0	1	1	1	1	0	0	0	1
2006-11-29	2006	1943-07-15	1	63.38	1	1	1421	1	1	2007-11-30	2007-11-30	1	0	#NULL!	1	1	0	0	0	0	1	1	0	0	0	0	1
2011-09-29	2011	1948-05-15	1	63.37	3	3	1409	1	1	2013-03-31	2013-03-31	1.5	0	#NULL!	1	0	0	0	0	0	0	0	0	0	0	0	2
2012-02-24	2012	1948-10-15	1	63.36	3	1	1450	1	0	#NULL!	2013-12-31	1.85	0	#NULL!	1	0	0	0	0	0	0	0	0	0	0	0	#NULL!
2011-04-26	2011	1947-12-15	1	63.36	3	2	1419	1	1	2011-06-03	2011-06-03	0.1	0	#NULL!	1	0	0	0	0	0	0	0	0	0	0	0	0
2002-10-23	2002	1939-06-15	1	63.36	2	3	1479	0	0	#NULL!	2013-12-31	11.19	0	#NULL!	1	0	0	0	0	0	0	0	0	0	0	0	#NULL!
2005-07-26	2005	1942-03-15	1	63.36	2	2	1455	1	0	#NULL!	2013-12-31	8.43	0	#NULL!	1	0	0	0	0	0	1	0	0	0	0	0	#NULL!
2006-03-27	2006	1942-11-15	1	63.36	2	2	1419	1	1	2006-10-11	2006-10-11	0.54	0	#NULL!	1	0	0	0	0	0	1	0	0	0	0	0	1
2011-09-25	2011	1948-05-15	1	63.36	1	1	1618	0	0	#NULL!	2013-12-31	2.27	0	#NULL!	1	0	0	0	0	0	0	0	0	0	0	0	#NULL!
2001-05-22	2001	1938-01-15	0	63.35	3	3	1479	0	0	#NULL!	2013-12-31	12.61	1	2011-09-28	0	0	0	0	0	0	0	1	0	0	0	0	#NULL!
2011-09-22	2011	1948-05-15	1	63.35	3	1	1419	1	1	2011-12-10	2011-12-10	0.22	0	#NULL!	0	0	0	0	0	0	1	1	0	1	0	0	0
2009-04-21	2009	1945-12-15	1	63.35	2	1	1450	1	0	#NULL!	2013-12-31	4.7	0	#NULL!	1	1	0	1	0	0	1	0	0	0	0	0	#NULL!
2000-12-20	2000	1937-08-15	1	63.35	2	2	1409	1	1	2007-04-25	2007-04-25	6.34	0	#NULL!	0	0	0	0	0	0	0	1	0	0	0	1	6
2006-11-20	2006	1943-07-15	0	63.35	2	1	1619	0	1	2008-10-24	2008-10-24	1.93	0	#NULL!	0	0	0	0	0	0	1	1	0	0	0	0	2
2000-09-18	2000	1937-05-15	1	63.35	2	2	1452	1	1	2002-03-12	2002-03-12	1.48	1	2001-03-26	1	0	0	0	0	0	0	0	0	0	0	0	1
2007-12-20	2007	1944-08-15	1	63.35	1	2	1412	1	1	2013-09-05	2013-09-05	5.71	0	#NULL!	1	0	0	0	0	1	1	0	0	0	0	0	6
2003-08-21	2003	1940-04-15	1	63.35	1	1	1410	1	1	2008-10-06	2008-10-06	5.13	0	#NULL!	0	0	0	0	0	0	0	0	0	0	0	0	5
2012-12-20	2012	1949-08-15	1	63.35	1	2	1489	0	1	2013-12-13	2013-12-13	0.98	0	#NULL!	1	0	0	0	0	1	1	1	0	0	0	0	1
2002-02-20	2002	1938-10-15	1	63.35	1	1	1479	0	1	2003-08-01	2003-08-01	1.44	0	#NULL!	0	1	0	0	0	0	1	0	1	0	0	0	1
2009-03-18	2009	1945-11-15	1	63.34	3	2	1449	1	1	2010-04-29	2010-04-29	1.11	0	#NULL!	1	0	0	0	0	0	0	0	0	0	0	0	1
2004-03-18	2004	1940-11-15	1	63.34	2	2	1460	0	1	2004-09-19	2004-09-19	0.51	0	#NULL!	1	0	0	0	0	0	0	0	0	0	0	0	1
2004-10-18	2004	1941-06-15	0	63.34	2	2	1479	0	1	2006-09-24	2006-09-24	1.93	0	#NULL!	1	0	0	0	0	0	0	0	0	0	0	0	2
2012-03-18	2012	1948-11-15	1	63.34	1	2	1611	0	0	#NULL!	2013-12-31	1.79	0	#NULL!	1	0	0	1	0	0	1	0	1	0	0	0	#NULL!
2003-03-20	2003	1939-11-15	1	63.34	1	2	1439	1	1	2007-09-14	2007-09-14	4.49	0	#NULL!	1	0	0	0	0	0	1	0	0	0	0	0	4
2011-10-17	2011	1948-06-15	1	63.34	1	2	1420	1	0	#NULL!	2013-12-31	2.21	0	#NULL!	1	1	0	0	0	1	1	1	1	0	0	0	#NULL!
2011-02-15	2011	1947-10-15	1	63.34	1	3	1450	1	0	#NULL!	2013-12-31	2.87	0	#NULL!	0	0	0	0	0	0	0	0	0	0	0	0	#NULL!
2011-01-13	2011	1947-09-15	1	63.33	4	3	1479	0	0	#NULL!	2013-12-31	2.97	0	#NULL!	1	0	0	0	0	1	1	1	0	0	0	0	#NULL!
2008-04-14	2008	1944-12-15	1	63.33	3	3	1459	1	1	2008-10-02	2008-10-02	0.47	0	#NULL!	1	0	0	0	0	1	1	1	1	0	0	0	0
2011-07-13	2011	1948-03-15	1	63.33	3	1	1489	0	1	2011-11-06	2011-11-06	0.32	0	#NULL!	1	0	0	0	0	1	1	1	0	0	0	0	0
2013-05-16	2013	1950-01-15	1	63.33	2	3	1412	1	1	2013-09-07	2013-09-07	0.31	0	#NULL!	0	1	0	0	0	0	1	1	1	1	1	0	0
2012-07-13	2012	1949-03-15	0	63.33	2	1	1479	0	0	#NULL!	2013-12-31	1.47	0	#NULL!	1	0	0	0	0	1	1	1	1	1	0	0	#NULL!
2005-11-11	2005	1942-07-15	1	63.33	2	2	1481	0	0	#NULL!	2013-12-31	8.14	0	#NULL!	1	0	0	0	0	0	0	0	0	0	0	0	#NULL!
2012-07-12	2012	1949-03-15	0	63.33	1	1	1469	0	0	#NULL!	2013-12-31	1.47	0	#NULL!	1	0	0	0	0	1	1	1	0	0	0	0	#NULL!
2001-03-14	2001	1937-11-15	1	63.33	1	1	1410	1	1	2002-07-25	2002-07-25	1.36	0	#NULL!	0	0	0	0	0	0	0	0	1	0	0	1	1
2005-01-14	2005	1941-09-15	1	63.33	1	3	1611	0	1	2006-05-31	2006-05-31	1.37	0	#NULL!	1	0	0	0	0	0	0	1	0	0	0	0	1
2005-07-15	2005	1942-03-15	1	63.33	1	1	145	1	1	2006-04-20	2006-04-20	0.76	0	#NULL!	1	0	0	0	0	0	0	0	0	0	0	0	1
2002-04-15	2002	1938-12-15	1	63.33	1	2	1479	0	1	2002-10-27	2002-10-27	0.53	0	#NULL!	1	0	0	0	0	0	1	0	0	0	0	0	1
2006-12-14	2006	1943-08-15	1	63.33	1	2	1431	1	0	#NULL!	2008-01-22	1.11	0	#NULL!	1	0	0	0	0	0	1	0	0	0	0	1	#NULL!
2003-12-11	2003	1940-08-15	1	63.32	4	3	1479	0	0	#NULL!	2013-12-31	10.06	0	#NULL!	0	0	0	0	0	1	0	0	0	0	0	0	#NULL!
2007-09-10	2007	1944-05-15	1	63.32	3	2	1481	0	1	2009-09-21	2009-09-21	2.03	0	#NULL!	0	1	0	0	0	0	1	1	0	0	0	1	2
2012-06-11	2012	1949-02-15	0	63.32	3	3	1479	0	0	#NULL!	2013-12-31	1.56	0	#NULL!	1	0	0	0	0	1	1	1	1	0	0	0	#NULL!
2012-02-09	2012	1948-10-15	1	63.32	3	1	1619	0	0	#NULL!	2013-12-31	1.89	0	#NULL!	1	0	0	0	0	0	0	0	0	0	0	1	#NULL!
2012-04-10	2012	1948-12-15	1	63.32	2	3	1479	0	0	#NULL!	2013-12-31	1.72	0	#NULL!	0	0	0	0	0	0	0	0	0	0	0	0	#NULL!
2004-11-09	2004	1941-07-15	1	63.32	2	2	1409	1	1	2008-09-28	2008-09-28	3.89	1	2005-08-11	0	1	0	0	0	0	0	0	0	0	0	0	4
2013-01-10	2013	1949-09-15	1	63.32	1	2	1460	0	0	#NULL!	2013-12-31	0.97	0	#NULL!	1	0	0	0	0	0	0	0	0	0	0	0	#NULL!
2000-01-10	2000	1936-09-15	1	63.32	1	1	1419	1	1	2000-12-12	2000-12-12	0.92	0	#NULL!	0	0	0	0	0	0	0	0	0	0	0	0	1
2010-08-08	2010	1947-04-15	1	63.32	1	2	1453	1	1	2010-09-22	2010-09-22	0.12	0	#NULL!	1	0	0	0	0	1	1	1	1	0	0	0	0
2003-09-08	2003	1940-05-15	1	63.32	1	1	1611	0	1	2004-07-03	2004-07-03	0.82	0	#NULL!	1	0	0	0	0	0	0	0	0	0	0	0	1
2007-03-13	2007	1943-11-15	1	63.32	1	3	1459	1	1	2007-10-11	2007-10-11	0.58	0	#NULL!	1	1	0	0	0	1	0	0	1	0	0	1	1
2011-04-12	2011	1947-12-15	1	63.32	1	2	1459	1	1	2012-02-03	2012-02-03	0.81	0	#NULL!	1	0	0	0	0	0	1	0	0	0	0	0	1
2009-05-11	2009	1946-01-15	0	63.32	1	1	1421	1	1	2013-12-21	2013-12-21	4.61	0	#NULL!	0	1	0	0	0	1	1	1	1	0	0	0	5
2013-02-06	2013	1949-10-15	1	63.31	3	2	1611	0	0	#NULL!	2013-12-31	0.9	0	#NULL!	1	0	0	0	0	1	1	1	1	0	0	0	#NULL!
2003-05-08	2003	1940-01-15	1	63.31	3	2	146	0	1	2004-01-08	2004-01-08	0.67	0	#NULL!	1	0	0	0	0	1	1	0	1	0	0	0	1
2010-04-08	2010	1946-12-15	1	63.31	1	3	1479	0	0	#NULL!	2013-12-31	3.73	0	#NULL!	1	0	0	0	0	0	0	0	0	0	0	0	#NULL!
2011-06-08	2011	1948-02-15	1	63.31	1	2	1479	0	1	2013-03-24	2013-03-24	1.79	0	#NULL!	1	0	0	0	0	0	0	0	1	0	0	0	2
2012-10-01	2012	1949-06-15	1	63.3	3	1	1431	1	0	#NULL!	2013-12-31	1.25	0	#NULL!	0	0	0	1	0	1	1	1	1	1	1	0	#NULL!
2007-02-01	2007	1943-10-15	1	63.3	3	1	1414	1	1	2007-04-06	2007-04-06	0.18	0	#NULL!	1	0	0	0	0	0	0	0	0	0	0	0	0
2004-11-02	2004	1941-07-15	1	63.3	3	2	1461	0	1	2012-02-13	2012-02-13	7.28	0	#NULL!	0	1	0	1	0	1	0	0	1	1	0	0	7
2007-04-02	2007	1943-12-15	1	63.3	2	1	1479	0	1	2008-09-12	2008-09-12	1.45	0	#NULL!	1	0	0	0	0	0	0	0	0	0	0	0	1
2009-09-03	2009	1946-05-15	1	63.3	2	3	1431	1	0	#NULL!	2013-12-31	4.33	0	#NULL!	1	0	0	0	0	0	0	0	0	0	0	0	#NULL!
2005-02-03	2005	1941-10-15	1	63.3	1	3	149	0	1	2013-12-14	2013-12-14	8.86	0	#NULL!	0	0	0	0	0	1	0	1	0	0	0	0	9
2008-10-01	2008	1945-06-15	1	63.3	1	1	1450	1	1	2010-03-08	2010-03-08	1.43	0	#NULL!	0	0	0	0	0	0	0	1	1	0	0	0	1
2007-05-04	2007	1944-01-15	1	63.3	1	2	1489	0	1	2010-10-30	2010-10-30	3.49	0	#NULL!	1	0	0	0	0	0	0	0	0	0	0	1	3
2008-04-02	2008	1944-12-15	0	63.3	1	1	1479	0	0	#NULL!	2013-12-31	5.75	0	#NULL!	1	0	0	0	0	0	0	1	0	0	0	0	#NULL!
2007-04-02	2007	1943-12-15	1	63.3	1	3	1450	1	1	2007-07-02	2007-07-02	0.25	0	#NULL!	1	0	0	0	0	0	0	0	0	0	0	0	0
2010-08-04	2010	1947-04-15	1	63.3	1	3	1450	1	1	2013-05-17	2013-05-17	2.78	0	#NULL!	1	0	0	0	0	0	1	0	0	0	0	1	3
2010-07-02	2010	1947-03-15	1	63.3	1	3	147	0	0	#NULL!	2013-12-31	3.5	0	#NULL!	1	0	0	0	0	0	1	0	0	0	0	0	#NULL!
2003-12-01	2003	1940-08-15	1	63.29	3	2	1489	0	1	2005-09-08	2005-09-08	1.77	0	#NULL!	0	0	0	0	1	0	0	0	0	0	0	0	2
2010-03-02	2010	1946-11-15	0	63.29	3	2	1479	0	0	#NULL!	2013-12-31	3.83	0	#NULL!	1	0	0	0	0	1	1	1	0	1	0	0	#NULL!
2009-12-28	2009	1946-09-15	1	63.29	3	3	1489	0	0	#NULL!	2013-12-31	4.01	0	#NULL!	1	0	0	0	0	0	1	1	0	0	0	0	#NULL!
2007-05-01	2007	1944-01-15	0	63.29	3	2	1479	0	1	2010-08-02	2010-08-02	3.26	0	#NULL!	1	0	0	0	0	1	1	0	0	0	0	0	3
2002-10-28	2002	1939-07-15	1	63.29	2	2	1479	0	0	#NULL!	2013-12-31	11.18	0	#NULL!	1	0	0	0	0	0	0	0	0	0	0	0	#NULL!
2010-03-29	2010	1946-12-15	1	63.29	2	2	1481	0	1	2010-09-29	2010-09-29	0.5	0	#NULL!	1	0	0	0	0	0	1	0	0	0	0	0	1
2004-05-02	2004	1941-01-15	1	63.29	2	2	1410	1	1	2004-11-09	2004-11-09	0.52	0	#NULL!	1	0	0	0	0	0	0	0	0	0	0	0	1
2004-11-29	2004	1941-08-15	1	63.29	1	3	1619	0	0	#NULL!	2013-12-31	9.09	0	#NULL!	1	0	0	0	0	0	1	0	1	0	0	0	#NULL!
2011-04-27	2011	1948-01-15	1	63.28	3	2	1479	0	0	#NULL!	2013-12-31	2.68	0	#NULL!	1	0	0	0	0	0	0	0	0	0	0	0	#NULL!
2004-10-26	2004	1941-07-15	1	63.28	2	1	1481	0	1	2006-01-23	2006-01-23	1.24	0	#NULL!	1	1	0	0	0	1	1	1	1	0	0	0	1
2005-10-24	2005	1942-07-15	1	63.28	2	2	145	1	1	2013-07-31	2013-07-31	7.77	0	#NULL!	0	0	0	0	0	0	0	0	0	0	0	0	8
2011-06-27	2011	1948-03-15	1	63.28	1	2	1619	0	0	#NULL!	2013-12-31	2.51	0	#NULL!	0	0	0	0	0	0	0	0	0	0	0	0	#NULL!
2013-02-25	2013	1949-11-15	1	63.28	1	2	1483	0	0	#NULL!	2013-12-31	0.85	0	#NULL!	1	0	0	0	0	0	1	0	1	0	0	0	#NULL!
2012-01-26	2012	1948-10-15	1	63.28	1	1	1450	1	0	#NULL!	2013-12-31	1.93	0	#NULL!	1	0	0	0	0	0	0	0	0	0	0	1	#NULL!
2013-09-23	2013	1950-06-15	1	63.27	4	3	1482	0	0	#NULL!	2013-12-31	0.27	0	#NULL!	0	1	0	0	0	1	1	1	1	0	0	0	#NULL!
2001-08-20	2001	1938-05-15	1	63.27	3	2	1450	1	1	2002-05-25	2002-05-25	0.76	0	#NULL!	1	0	0	0	0	0	0	0	0	0	0	0	1
2013-11-21	2013	1950-08-15	1	63.27	2	1	1459	1	0	#NULL!	2013-12-31	0.11	0	#NULL!	0	1	0	0	0	0	1	1	0	0	0	0	#NULL!
2007-06-21	2007	1944-03-15	1	63.27	2	2	1489	0	1	2011-05-10	2011-05-10	3.89	0	#NULL!	1	0	0	0	0	0	0	0	0	0	0	0	4
2007-04-23	2007	1944-01-15	0	63.27	2	2	1479	0	0	#NULL!	2013-12-31	6.69	0	#NULL!	1	0	0	0	0	0	0	0	0	0	0	0	#NULL!
2007-08-21	2007	1944-05-15	1	63.27	1	2	1459	1	1	2008-01-27	2008-01-27	0.44	0	#NULL!	0	0	0	0	0	0	1	0	0	0	0	0	0
2000-04-22	2000	1937-01-15	1	63.27	1	1	1479	0	1	2002-11-29	2002-11-29	2.6	0	#NULL!	1	0	0	0	0	1	0	0	0	0	0	0	3
2013-02-20	2013	1949-11-15	0	63.27	1	2	1460	0	0	#NULL!	2013-12-31	0.86	0	#NULL!	1	0	0	0	0	0	0	1	0	0	0	0	#NULL!
2006-01-23	2006	1942-10-15	1	63.27	1	3	1479	0	1	2012-10-11	2012-10-11	6.72	0	#NULL!	1	0	0	0	0	0	1	0	0	0	0	0	7
2004-11-16	2004	1941-08-15	1	63.26	3	2	1489	0	1	2008-05-22	2008-05-22	3.51	0	#NULL!	1	0	0	0	0	0	0	0	0	0	0	0	4
2003-02-19	2003	1939-11-15	1	63.26	3	2	1479	0	1	2013-07-30	2013-07-30	10.44	0	#NULL!	1	0	0	0	0	0	0	0	0	0	0	0	10
2003-11-17	2003	1940-08-15	1	63.26	3	2	1489	0	1	2012-03-16	2012-03-16	8.33	0	#NULL!	1	1	0	0	0	0	1	0	1	0	0	0	8
2011-09-20	2011	1948-06-15	1	63.26	2	2	1452	1	0	#NULL!	2013-12-31	2.28	0	#NULL!	1	0	0	0	0	1	1	1	0	1	0	1	#NULL!
2012-07-19	2012	1949-04-15	1	63.26	2	2	1469	0	0	#NULL!	2013-12-31	1.45	0	#NULL!	1	0	0	0	0	0	1	0	0	0	0	0	#NULL!
2010-07-19	2010	1947-04-15	1	63.26	1	1	1410	1	0	#NULL!	2013-12-31	3.45	0	#NULL!	1	0	0	0	0	0	0	1	0	0	0	0	#NULL!
2012-06-18	2012	1949-03-15	0	63.26	1	1	1479	0	0	#NULL!	2013-12-31	1.54	0	#NULL!	1	0	0	0	0	0	1	0	0	0	0	0	#NULL!
2003-07-21	2003	1940-04-15	1	63.26	1	2	1619	0	0	#NULL!	2013-12-31	10.45	1	2011-12-08	0	0	0	0	0	1	1	1	0	0	0	0	#NULL!
2012-12-18	2012	1949-09-15	1	63.26	1	3	1489	0	0	#NULL!	2013-12-31	1.03	0	#NULL!	1	0	0	0	0	1	0	0	0	0	0	0	#NULL!
2010-09-16	2010	1947-06-15	1	63.26	1	1	1450	1	1	2011-12-07	2011-12-07	1.22	0	#NULL!	1	0	0	0	0	0	0	0	0	0	0	0	1
2006-01-19	2006	1942-10-15	1	63.26	1	1	1479	0	0	#NULL!	2013-12-31	7.95	1	2008-11-13	1	0	0	0	0	0	0	1	1	0	0	0	#NULL!
2013-06-19	2013	1950-03-15	1	63.26	1	1	1479	0	0	#NULL!	2013-12-31	0.53	0	#NULL!	1	0	0	0	0	0	0	1	0	0	0	0	#NULL!
2000-11-13	2000	1937-08-15	1	63.25	3	2	1489	0	1	2002-12-09	2002-12-09	2.07	0	#NULL!	1	0	0	0	0	0	0	0	0	0	0	0	2
2006-08-14	2006	1943-05-15	1	63.25	3	2	1479	0	0	#NULL!	2013-12-31	7.38	0	#NULL!	0	0	0	0	0	0	0	0	0	0	0	0	#NULL!
2011-06-14	2011	1948-03-15	1	63.25	3	3	1410	1	1	2012-02-19	2012-02-19	0.68	0	#NULL!	1	0	0	0	0	1	1	1	0	0	0	0	1
2009-10-14	2009	1946-07-15	1	63.25	2	1	1481	0	1	2010-06-07	2010-06-07	0.65	0	#NULL!	0	0	0	0	0	1	0	1	0	0	0	0	1
2001-01-15	2001	1937-10-15	1	63.25	2	1	1450	1	1	2002-04-21	2002-04-21	1.26	0	#NULL!	0	0	0	0	0	1	0	0	1	0	0	1	1
2008-06-13	2008	1945-03-15	1	63.25	1	2	1619	0	0	#NULL!	2013-12-31	5.55	0	#NULL!	0	0	0	0	0	0	0	0	0	0	0	0	#NULL!
2010-12-15	2010	1947-09-15	1	63.25	1	2	1479	0	0	#NULL!	2013-12-31	3.04	0	#NULL!	1	0	0	0	0	1	1	1	1	0	0	0	#NULL!
2003-05-13	2003	1940-02-15	1	63.24	2	2	1419	1	1	2004-07-19	2004-07-19	1.19	0	#NULL!	0	0	0	0	0	1	1	0	0	0	0	0	1
2005-10-11	2005	1942-07-15	1	63.24	2	2	1482	0	1	2009-11-21	2009-11-21	4.11	1	2007-03-03	1	0	0	0	0	0	0	0	0	0	0	0	4
2008-04-11	2008	1945-01-15	1	63.24	1	1	1419	1	1	2008-06-21	2008-06-21	0.19	0	#NULL!	1	0	0	0	0	1	1	1	1	0	0	0	0
2002-12-10	2002	1939-09-15	0	63.24	1	1	1479	0	1	2004-03-25	2004-03-25	1.29	0	#NULL!	1	0	0	0	0	0	0	0	0	0	0	0	1
2003-11-13	2003	1940-08-15	1	63.24	1	3	1611	0	1	2005-12-24	2005-12-24	2.11	0	#NULL!	1	0	0	0	0	0	0	0	0	0	0	1	2
2004-06-10	2004	1941-03-15	1	63.24	1	1	1459	1	0	#NULL!	2013-12-31	9.56	0	#NULL!	1	0	0	0	0	0	0	0	0	0	0	0	#NULL!
2002-12-10	2002	1939-09-15	0	63.24	1	2	1479	0	0	#NULL!	2013-12-31	11.06	0	#NULL!	1	0	0	0	0	0	0	0	0	0	0	0	#NULL!
2000-03-13	2000	1936-12-15	1	63.24	1	1	1419	1	0	#NULL!	2013-12-31	13.8	0	#NULL!	1	0	0	0	0	0	0	0	0	0	0	0	#NULL!
2010-09-10	2010	1947-06-15	1	63.24	1	1	1419	1	1	2013-02-24	2013-02-24	2.46	0	#NULL!	0	0	0	0	0	0	0	0	0	0	0	0	2
2009-03-12	2009	1945-12-15	1	63.24	1	2	1479	0	0	#NULL!	2013-12-31	4.8	0	#NULL!	1	0	0	0	0	0	0	0	0	0	0	0	#NULL!
2000-04-07	2000	1937-01-15	0	63.23	3	2	1450	1	1	2001-05-19	2001-05-19	1.11	0	#NULL!	1	0	0	0	0	0	0	0	0	0	0	0	1
2000-03-07	2000	1936-12-15	1	63.23	3	2	1470	0	1	2008-07-17	2008-07-17	8.36	0	#NULL!	1	0	0	0	0	0	0	0	0	0	0	0	8
2011-04-07	2011	1948-01-15	0	63.23	3	1	1479	0	1	2012-04-10	2012-04-10	1.01	1	2011-09-24	0	0	0	0	0	0	1	0	0	0	0	0	1
2006-02-07	2006	1942-11-15	1	63.23	3	1	1450	1	1	2009-09-22	2009-09-22	3.62	0	#NULL!	0	0	0	0	0	0	1	0	1	0	0	0	4
2010-01-05	2010	1946-10-15	1	63.23	2	2	1431	1	0	#NULL!	2013-12-31	3.99	0	#NULL!	1	0	0	0	0	0	0	0	0	0	0	0	#NULL!
2003-04-08	2003	1940-01-15	0	63.23	2	2	1489	0	1	2003-05-23	2003-05-23	0.12	0	#NULL!	1	0	0	0	0	0	0	0	1	0	0	0	0
2009-10-08	2009	1946-07-15	1	63.23	1	1	1450	1	1	2011-08-27	2011-08-27	1.88	0	#NULL!	1	0	0	0	0	1	1	0	1	0	0	0	2
2010-12-07	2010	1947-09-15	1	63.23	1	2	1479	0	1	2011-04-27	2011-04-27	0.39	0	#NULL!	1	0	0	0	0	1	1	0	0	0	0	0	0
2004-07-07	2004	1941-04-15	1	63.23	1	3	1479	0	1	2007-01-30	2007-01-30	2.57	0	#NULL!	1	1	0	1	0	0	1	0	0	0	0	0	3
2000-05-09	2000	1937-02-15	1	63.23	1	3	1479	0	1	2002-12-12	2002-12-12	2.59	0	#NULL!	1	0	0	0	0	0	0	0	0	0	0	0	3
2007-06-08	2007	1944-03-15	1	63.23	1	1	1610	0	1	2009-07-07	2009-07-07	2.08	0	#NULL!	1	0	0	0	0	1	1	0	0	0	0	0	2
2003-07-07	2003	1940-04-15	1	63.23	1	3	1479	0	1	2011-04-26	2011-04-26	7.8	0	#NULL!	0	0	0	0	0	0	1	0	0	0	0	0	8
2004-05-10	2004	1941-02-15	0	63.23	1	1	1470	0	1	2009-02-14	2009-02-14	4.77	0	#NULL!	1	1	0	0	0	0	1	0	0	0	0	0	5
2011-01-04	2011	1947-10-15	1	63.22	3	2	1419	1	1	2011-06-05	2011-06-05	0.42	0	#NULL!	1	0	0	0	0	0	1	0	0	0	0	0	0
2005-10-03	2005	1942-07-15	0	63.22	3	2	1479	0	0	#NULL!	2013-12-31	8.24	0	#NULL!	1	0	0	0	0	0	0	0	0	0	0	0	#NULL!
2009-08-04	2009	1946-05-15	1	63.22	3	2	1460	0	0	#NULL!	2013-12-31	4.41	0	#NULL!	1	0	0	0	0	0	1	0	0	0	0	0	#NULL!
2007-01-04	2007	1943-10-15	1	63.22	3	2	1452	1	1	2012-08-27	2012-08-27	5.65	0	#NULL!	0	0	0	0	0	0	0	0	0	0	0	0	6
2005-10-03	2005	1942-07-15	0	63.22	3	2	1459	1	1	2006-06-26	2006-06-26	0.73	0	#NULL!	1	0	0	0	0	0	0	0	0	0	0	0	1
2008-05-05	2008	1945-02-15	0	63.22	2	2	1429	1	1	2013-02-04	2013-02-04	4.75	0	#NULL!	0	0	0	0	0	0	0	1	0	0	0	0	5
2009-11-04	2009	1946-08-15	1	63.22	2	2	1450	1	1	2010-11-12	2010-11-12	1.02	0	#NULL!	1	0	0	0	0	1	0	0	0	0	0	0	1
2007-03-05	2007	1943-12-15	1	63.22	2	2	1619	0	1	2007-11-04	2007-11-04	0.67	0	#NULL!	1	0	0	0	0	0	0	1	1	0	0	0	1
2004-11-03	2004	1941-08-15	1	63.22	2	2	1450	1	0	#NULL!	2013-12-31	9.16	0	#NULL!	1	0	0	0	0	0	0	0	1	0	0	0	#NULL!
2007-06-05	2007	1944-03-15	1	63.22	2	3	1489	0	1	2008-04-18	2008-04-18	0.87	0	#NULL!	1	1	0	0	0	0	1	0	0	0	0	0	1
2007-12-06	2007	1944-09-15	1	63.22	2	2	1481	0	1	2008-06-30	2008-06-30	0.57	0	#NULL!	1	0	0	0	0	0	0	0	0	0	0	0	1
2011-10-03	2011	1948-07-15	1	63.22	2	1	1450	1	1	2013-02-06	2013-02-06	1.35	0	#NULL!	1	1	0	0	0	1	1	1	0	0	0	0	1
2012-06-04	2012	1949-03-15	1	63.22	1	2	1459	1	1	2013-11-30	2013-11-30	1.49	0	#NULL!	1	0	0	0	0	0	1	0	0	0	0	0	1
2008-06-02	2008	1945-03-15	1	63.22	1	1	1450	1	1	2008-12-28	2008-12-28	0.57	0	#NULL!	1	0	0	0	0	0	1	0	0	0	0	0	1
2012-06-04	2012	1949-03-15	1	63.22	1	3	1450	1	0	#NULL!	2013-12-31	1.57	0	#NULL!	1	0	0	0	0	0	0	1	0	0	0	1	#NULL!
2002-05-06	2002	1939-02-15	1	63.22	1	3	1481	0	1	2003-02-06	2003-02-06	0.76	0	#NULL!	0	0	0	0	0	0	1	0	0	0	0	0	1
2007-05-06	2007	1944-02-15	1	63.22	1	3	1469	0	0	#NULL!	2013-12-31	6.66	0	#NULL!	1	1	0	1	0	0	0	1	0	0	0	0	#NULL!
2000-04-05	2000	1937-01-15	1	63.22	1	2	1489	0	1	2000-06-20	2000-06-20	0.21	0	#NULL!	1	0	0	0	0	0	0	0	0	0	0	0	0
2006-08-03	2006	1943-05-15	1	63.22	1	3	1479	0	0	#NULL!	2013-12-31	7.41	0	#NULL!	1	0	0	0	0	0	0	0	0	0	0	0	#NULL!
2012-04-02	2012	1949-01-15	1	63.21	4	2	1459	1	0	#NULL!	2013-12-31	1.75	0	#NULL!	0	0	0	0	0	1	1	1	0	0	0	1	#NULL!
2012-10-01	2012	1949-07-15	1	63.21	4	3	1459	1	0	#NULL!	2013-12-31	1.25	0	#NULL!	1	0	0	0	0	0	1	0	0	0	0	0	#NULL!
2013-04-03	2013	1950-01-15	1	63.21	3	3	1412	1	0	#NULL!	2013-12-31	0.74	0	#NULL!	1	0	0	0	0	0	0	0	0	0	0	0	#NULL!
2006-06-29	2006	1943-04-15	1	63.21	3	2	1450	1	0	#NULL!	2013-12-31	7.51	0	#NULL!	1	0	0	0	0	0	0	0	0	0	0	0	#NULL!
2012-04-02	2012	1949-01-15	1	63.21	3	2	1419	1	0	#NULL!	2013-12-31	1.75	0	#NULL!	1	0	0	0	0	0	1	0	0	0	0	0	#NULL!
2012-01-31	2012	1948-11-15	1	63.21	3	2	1419	1	1	2012-07-12	2012-07-12	0.45	0	#NULL!	1	0	0	0	0	0	0	0	0	0	0	1	0
2012-02-02	2012	1948-11-15	1	63.21	3	1	1450	1	1	2012-06-06	2012-06-06	0.34	0	#NULL!	1	0	0	0	0	1	1	0	0	0	0	0	0
2006-05-04	2006	1943-02-15	1	63.21	3	1	1412	1	1	2007-02-24	2007-02-24	0.81	0	#NULL!	1	0	0	0	0	0	0	0	0	0	0	0	1
2009-09-30	2009	1946-07-15	1	63.21	2	2	1419	1	0	#NULL!	2013-12-31	4.25	0	#NULL!	0	0	0	0	0	0	0	0	0	0	0	0	#NULL!
2002-04-01	2002	1939-01-15	1	63.21	2	2	1459	1	1	2003-04-19	2003-04-19	1.05	0	#NULL!	1	0	0	0	0	0	0	0	0	0	0	0	1
2009-12-01	2009	1946-09-15	1	63.21	1	1	1420	1	0	#NULL!	2013-12-31	4.08	0	#NULL!	1	0	0	0	0	0	1	1	0	0	0	0	#NULL!
2012-01-02	2012	1948-10-15	1	63.21	1	3	1489	0	0	#NULL!	2013-12-31	2	0	#NULL!	1	0	0	0	0	1	1	1	0	0	0	0	#NULL!
2012-02-02	2012	1948-11-15	1	63.21	1	2	1489	0	0	#NULL!	2013-12-31	1.91	0	#NULL!	1	0	0	0	0	0	0	0	0	0	0	0	#NULL!
2010-07-02	2010	1947-04-15	1	63.21	1	3	1479	0	1	2011-02-01	2011-02-01	0.59	0	#NULL!	1	0	0	0	0	0	1	1	0	0	0	0	1
2005-11-01	2005	1942-08-15	1	63.21	1	3	1431	1	1	2006-02-17	2006-02-17	0.3	1	2005-12-29	1	0	0	0	0	0	1	0	0	0	0	0	0
2007-02-01	2007	1943-11-15	1	63.21	1	1	1619	0	1	2008-10-06	2008-10-06	1.68	0	#NULL!	1	0	0	0	0	0	0	0	0	0	0	0	2
2011-09-27	2011	1948-07-15	1	63.2	4	3	1410	1	1	2012-06-03	2012-06-03	0.68	0	#NULL!	1	0	0	0	0	0	0	0	0	0	0	0	1
2012-12-25	2012	1949-10-15	0	63.2	3	2	1479	0	0	#NULL!	2013-12-31	1.02	0	#NULL!	0	0	0	0	0	1	1	1	0	0	0	0	#NULL!
2012-01-26	2012	1948-11-15	1	63.2	3	2	1460	0	0	#NULL!	2013-12-31	1.93	0	#NULL!	1	1	0	0	0	0	0	1	0	0	0	0	#NULL!
2011-07-28	2011	1948-05-15	1	63.2	3	3	1439	1	0	#NULL!	2013-12-31	2.43	0	#NULL!	0	1	0	0	0	1	1	1	1	0	0	1	#NULL!
2007-09-26	2007	1944-07-15	1	63.2	3	3	1479	0	1	2008-04-09	2008-04-09	0.54	0	#NULL!	1	0	0	0	0	0	1	1	1	0	0	0	1
2013-08-26	2013	1950-06-15	1	63.2	1	3	1450	1	0	#NULL!	2013-12-31	0.35	0	#NULL!	1	0	0	0	0	0	1	1	0	0	0	0	#NULL!
2007-03-30	2007	1944-01-15	1	63.2	1	2	1419	1	1	2009-05-30	2009-05-30	2.17	1	2009-01-20	1	1	0	0	0	1	0	1	0	0	0	0	2
2012-09-24	2012	1949-07-15	1	63.2	1	1	1450	1	0	#NULL!	2013-12-31	1.27	0	#NULL!	1	1	0	0	0	1	1	1	0	0	0	0	#NULL!
2005-12-28	2005	1942-10-15	1	63.2	1	2	1459	1	1	2007-06-18	2007-06-18	1.47	0	#NULL!	1	0	0	0	0	0	0	0	0	0	0	0	1
2005-11-24	2005	1942-09-15	1	63.19	3	2	1470	0	1	2008-01-28	2008-01-28	2.18	0	#NULL!	1	1	0	0	0	0	1	0	0	0	0	0	2
2003-03-26	2003	1940-01-15	1	63.19	2	3	1479	0	0	#NULL!	2013-12-31	10.77	0	#NULL!	1	0	0	0	0	0	0	0	0	0	0	0	#NULL!
2000-02-24	2000	1936-12-15	1	63.19	2	2	1449	1	1	2002-02-22	2002-02-22	2	0	#NULL!	1	1	0	0	0	0	1	0	0	0	0	0	2
2003-09-23	2003	1940-07-15	1	63.19	1	3	1481	0	1	2006-10-29	2006-10-29	3.1	0	#NULL!	0	0	0	0	0	0	0	0	0	0	0	0	3
2007-12-24	2007	1944-10-15	1	63.19	1	2	1479	0	0	#NULL!	2013-12-31	6.02	0	#NULL!	1	0	0	0	0	0	0	0	0	0	0	0	#NULL!
2004-03-22	2004	1941-01-15	1	63.18	4	1	1450	1	0	#NULL!	2013-12-31	9.78	0	#NULL!	1	0	0	0	0	0	0	0	0	0	0	0	#NULL!
2008-10-21	2008	1945-08-15	1	63.18	3	2	1459	1	0	#NULL!	2013-12-31	5.19	0	#NULL!	0	0	0	0	0	1	0	1	0	0	0	0	#NULL!
2003-04-21	2003	1940-02-15	1	63.18	1	1	1455	1	1	2004-04-06	2004-04-06	0.96	0	#NULL!	1	0	0	0	0	0	0	1	0	0	0	0	1
2007-04-23	2007	1944-02-15	0	63.18	1	2	1479	0	0	#NULL!	2013-12-31	6.69	0	#NULL!	1	0	0	0	0	0	1	0	0	0	0	0	#NULL!
2003-10-22	2003	1940-08-15	1	63.18	1	1	1479	0	1	2011-04-21	2011-04-21	7.5	1	2006-02-22	1	1	0	0	0	1	1	1	1	0	0	0	7
2012-04-21	2012	1949-02-15	1	63.18	1	3	1419	1	0	#NULL!	2013-12-31	1.69	0	#NULL!	1	1	0	0	0	0	1	1	0	0	0	0	#NULL!
2007-03-19	2007	1944-01-15	1	63.17	4	2	1419	1	0	#NULL!	2013-12-31	6.79	0	#NULL!	1	0	0	0	0	0	0	0	0	0	0	0	#NULL!
2001-08-15	2001	1938-06-15	1	63.17	2	2	1479	0	1	2009-04-23	2009-04-23	7.69	0	#NULL!	1	0	0	0	0	0	0	0	0	0	0	0	8
2005-05-17	2005	1942-03-15	1	63.17	2	1	1431	1	1	2009-07-10	2009-07-10	4.15	0	#NULL!	0	0	0	0	0	0	0	0	0	0	0	0	4
2004-06-17	2004	1941-04-15	1	63.17	2	2	1450	1	1	2005-10-30	2005-10-30	1.37	0	#NULL!	1	0	0	0	0	1	1	1	0	0	0	0	1
2012-02-17	2012	1948-12-15	1	63.17	1	3	148	0	0	#NULL!	2013-12-31	1.87	1	2012-04-14	1	0	0	0	0	1	1	1	1	1	0	0	#NULL!
2007-10-16	2007	1944-08-15	1	63.17	1	1	1610	0	0	#NULL!	2013-12-31	6.21	0	#NULL!	1	0	0	0	0	0	1	0	0	0	0	0	#NULL!
2008-11-14	2008	1945-09-15	0	63.16	4	2	1410	1	0	#NULL!	2013-12-31	5.13	0	#NULL!	1	0	0	0	0	1	1	1	0	0	0	0	#NULL!
2005-03-16	2005	1942-01-15	1	63.16	3	2	1479	0	1	2005-07-25	2005-07-25	0.36	0	#NULL!	1	0	0	0	0	0	0	0	1	0	0	0	0
2012-10-12	2012	1949-08-15	1	63.16	3	2	1466	0	1	2013-06-12	2013-06-12	0.67	0	#NULL!	0	1	0	0	0	1	1	1	0	0	0	0	1
2009-08-12	2009	1946-06-15	1	63.16	3	3	1460	0	0	#NULL!	2013-12-31	4.39	0	#NULL!	1	0	0	0	0	0	1	0	1	0	0	0	#NULL!
2011-10-12	2011	1948-08-15	1	63.16	3	2	1489	0	1	2012-06-16	2012-06-16	0.68	0	#NULL!	1	0	0	0	0	1	1	1	0	0	0	0	1
2011-09-14	2011	1948-07-15	1	63.16	3	2	1419	1	0	#NULL!	2013-12-31	2.3	0	#NULL!	1	1	0	0	0	0	1	0	0	0	0	0	#NULL!
2008-02-14	2008	1944-12-15	1	63.16	2	1	1459	1	0	#NULL!	2013-12-31	5.88	0	#NULL!	1	0	0	0	0	0	0	0	0	0	0	1	#NULL!
2010-06-14	2010	1947-04-15	1	63.16	2	2	1459	1	0	#NULL!	2013-12-31	3.55	0	#NULL!	0	0	0	0	0	0	1	0	0	0	0	0	#NULL!
2004-10-13	2004	1941-08-15	1	63.16	2	3	1460	0	1	2012-06-18	2012-06-18	7.68	0	#NULL!	0	0	0	0	0	0	1	1	1	0	0	0	8
2012-05-14	2012	1949-03-15	1	63.16	1	2	1450	1	0	#NULL!	2013-12-31	1.63	0	#NULL!	1	0	0	0	0	0	1	0	0	0	0	0	#NULL!
2003-09-13	2003	1940-07-15	1	63.16	1	1	1410	1	1	2005-04-08	2005-04-08	1.57	0	#NULL!	1	0	0	0	0	1	0	0	0	0	0	0	2
2001-08-14	2001	1938-06-15	0	63.16	1	1	1479	0	1	2002-07-10	2002-07-10	0.9	0	#NULL!	1	0	0	0	0	0	0	1	1	0	0	0	1
2012-12-12	2012	1949-10-15	1	63.16	1	1	1412	1	1	2013-04-27	2013-04-27	0.37	0	#NULL!	1	0	0	0	0	0	0	0	0	0	0	0	0
2006-12-08	2006	1943-10-15	1	63.15	3	2	1479	0	0	#NULL!	2013-12-31	7.06	1	2011-09-19	1	0	0	0	0	0	0	0	0	0	0	0	#NULL!
2009-12-08	2009	1946-10-15	1	63.15	3	1	1479	0	1	2010-06-17	2010-06-17	0.52	0	#NULL!	1	0	0	0	0	0	0	0	0	0	0	0	1
2010-04-12	2010	1947-02-15	1	63.15	3	2	1479	0	0	#NULL!	2013-12-31	3.72	0	#NULL!	1	0	0	0	0	0	0	0	0	0	0	0	#NULL!
2008-01-11	2008	1944-11-15	1	63.15	3	2	1489	0	1	2011-12-29	2011-12-29	3.96	0	#NULL!	0	0	0	0	0	0	0	0	0	0	0	0	4
2004-05-10	2004	1941-03-15	1	63.15	2	2	1453	1	1	2004-09-29	2004-09-29	0.39	0	#NULL!	1	0	0	0	0	0	0	0	0	0	0	0	0
2000-09-08	2000	1937-07-15	1	63.15	2	2	1469	0	1	2003-12-19	2003-12-19	3.28	0	#NULL!	1	1	0	1	0	0	1	1	1	0	0	0	3
2011-04-12	2011	1948-02-15	1	63.15	2	2	1431	1	0	#NULL!	2013-12-31	2.72	0	#NULL!	0	0	0	0	0	0	1	0	0	0	0	0	#NULL!
2002-04-11	2002	1939-02-15	0	63.15	2	1	149	0	0	#NULL!	2013-12-31	11.72	0	#NULL!	0	0	0	0	0	0	1	0	0	0	0	0	#NULL!
2009-06-09	2009	1946-04-15	1	63.15	2	1	1469	0	1	2011-05-02	2011-05-02	1.89	0	#NULL!	1	0	0	0	0	0	1	1	0	0	0	0	2
2003-07-08	2003	1940-05-15	1	63.15	1	2	1450	1	1	2011-02-05	2011-02-05	7.58	0	#NULL!	1	0	0	0	0	0	0	0	0	0	0	0	8
2009-04-09	2009	1946-02-15	1	63.15	1	3	1419	1	0	#NULL!	2013-12-31	4.73	0	#NULL!	1	0	0	0	0	0	0	0	0	0	0	0	#NULL!
2004-01-06	2004	1940-11-15	1	63.14	3	2	1412	1	0	#NULL!	2013-12-31	9.98	1	2004-09-17	0	0	0	0	0	1	0	0	0	0	0	0	#NULL!
2013-02-04	2013	1949-12-15	1	63.14	3	2	1450	1	0	#NULL!	2013-12-31	0.9	0	#NULL!	1	0	0	0	0	0	0	0	0	0	0	0	#NULL!
2011-08-05	2011	1948-06-15	1	63.14	3	2	1489	0	0	#NULL!	2013-12-31	2.41	0	#NULL!	0	0	0	0	0	0	1	0	0	0	0	0	#NULL!
2012-01-05	2012	1948-11-15	1	63.14	1	2	1450	1	0	#NULL!	2013-12-31	1.99	0	#NULL!	0	0	0	0	0	0	0	0	0	0	0	1	#NULL!
2006-11-06	2006	1943-09-15	1	63.14	1	2	1489	0	1	2009-06-24	2009-06-24	2.63	0	#NULL!	1	1	0	0	0	0	0	0	0	0	0	0	3
2008-10-06	2008	1945-08-15	0	63.14	1	3	1460	0	1	2009-02-02	2009-02-02	0.33	0	#NULL!	0	1	0	0	0	0	1	0	0	0	0	0	0
2001-01-04	2001	1937-11-15	1	63.14	1	1	1619	0	1	2001-11-01	2001-11-01	0.82	0	#NULL!	1	0	0	0	0	1	1	1	1	0	0	0	1
2005-08-01	2005	1942-06-15	1	63.13	4	1	1459	1	1	2006-04-07	2006-04-07	0.68	0	#NULL!	1	0	0	0	0	0	1	0	0	0	0	0	1
2002-03-05	2002	1939-01-15	1	63.13	3	2	1480	0	1	2003-02-13	2003-02-13	0.94	0	#NULL!	0	0	0	0	0	0	0	0	0	0	0	0	1
2009-04-03	2009	1946-02-15	1	63.13	3	2	1479	0	0	#NULL!	2013-12-31	4.74	0	#NULL!	1	0	0	0	0	0	1	0	0	0	0	0	#NULL!
2008-10-03	2008	1945-08-15	1	63.13	3	2	1450	1	1	2008-12-28	2008-12-28	0.24	0	#NULL!	1	0	0	0	0	0	0	0	0	0	0	0	0
2010-11-01	2010	1947-09-15	0	63.13	3	1	1420	1	0	#NULL!	2013-12-31	3.16	0	#NULL!	1	0	0	0	0	0	1	0	0	0	0	0	#NULL!
2011-09-02	2011	1948-07-15	1	63.13	2	2	1619	0	0	#NULL!	2013-12-31	2.33	0	#NULL!	0	0	0	1	0	1	0	0	0	1	0	0	#NULL!
2010-06-02	2010	1947-04-15	1	63.13	2	2	1479	0	0	#NULL!	2013-12-31	3.58	0	#NULL!	1	0	0	0	0	0	0	0	0	0	0	0	#NULL!
2005-06-03	2005	1942-04-15	1	63.13	1	1	1439	1	0	#NULL!	2013-12-31	8.58	0	#NULL!	1	0	0	0	0	0	0	0	0	0	0	1	#NULL!
2008-06-30	2008	1945-05-15	0	63.13	1	2	1479	0	0	#NULL!	2013-12-31	5.5	0	#NULL!	1	0	0	0	0	1	1	1	0	0	0	0	#NULL!
2009-06-02	2009	1946-04-15	0	63.13	1	2	1479	0	0	#NULL!	2013-12-31	4.58	0	#NULL!	1	0	0	0	0	0	0	0	0	0	0	0	#NULL!
2003-12-02	2003	1940-10-15	1	63.13	1	1	1450	1	1	2005-05-10	2005-05-10	1.44	0	#NULL!	1	0	0	0	0	1	1	0	1	1	0	0	1
2011-06-02	2011	1948-04-15	1	63.13	1	2	1450	1	1	2011-12-28	2011-12-28	0.57	0	#NULL!	0	0	0	0	0	1	1	1	1	0	0	0	1
2008-11-26	2008	1945-10-15	1	63.12	4	2	1489	0	1	2009-11-14	2009-11-14	0.97	0	#NULL!	1	0	0	0	0	1	1	1	0	0	0	1	1
2003-09-29	2003	1940-08-15	1	63.12	3	2	1438	1	1	2004-04-19	2004-04-19	0.56	0	#NULL!	1	0	0	0	0	0	0	0	1	0	0	0	1
2006-02-27	2006	1943-01-15	0	63.12	3	3	1479	0	0	#NULL!	2013-12-31	7.84	0	#NULL!	1	0	0	0	0	0	1	1	0	0	0	0	#NULL!
2012-06-27	2012	1949-05-15	1	63.12	3	1	1479	0	0	#NULL!	2013-10-10	1.29	0	#NULL!	1	0	0	0	0	0	0	0	0	0	0	0	#NULL!
2011-08-29	2011	1948-07-15	1	63.12	2	3	1481	0	0	#NULL!	2013-12-31	2.34	0	#NULL!	1	0	0	0	0	0	1	0	0	0	0	0	#NULL!
2005-03-01	2005	1942-01-15	1	63.12	2	2	1479	0	1	2008-02-16	2008-02-16	2.96	0	#NULL!	1	0	0	0	0	1	1	0	0	0	0	0	3
2003-05-28	2003	1940-04-15	1	63.12	2	2	1419	1	1	2005-05-21	2005-05-21	1.98	0	#NULL!	0	0	0	0	0	0	0	0	0	0	0	0	2
2012-06-28	2012	1949-05-15	1	63.12	1	3	1619	0	0	#NULL!	2013-12-31	1.51	0	#NULL!	1	1	0	0	0	0	1	0	0	0	0	0	#NULL!
2000-11-27	2000	1937-10-15	0	63.12	1	1	149	0	1	2002-07-03	2002-07-03	1.6	0	#NULL!	0	0	0	0	0	0	0	0	0	0	0	0	2
2012-11-28	2012	1949-10-15	1	63.12	1	2	1489	0	1	2013-09-17	2013-09-17	0.8	1	2013-09-06	1	0	0	0	0	0	0	0	0	0	0	0	1
2008-09-26	2008	1945-08-15	1	63.12	1	2	1460	0	0	#NULL!	2013-12-31	5.26	0	#NULL!	1	0	0	0	0	0	0	0	0	0	0	0	#NULL!
2012-12-26	2012	1949-11-15	1	63.11	2	3	1472	0	0	#NULL!	2013-12-31	1.01	0	#NULL!	0	0	0	0	0	0	0	0	1	0	0	0	#NULL!
2006-08-23	2006	1943-07-15	1	63.11	1	3	1419	1	1	2007-01-04	2007-01-04	0.37	0	#NULL!	1	0	0	0	0	1	0	1	0	0	0	1	0
2008-05-26	2008	1945-04-15	1	63.11	1	3	1421	1	0	#NULL!	2013-12-31	5.6	0	#NULL!	1	0	0	0	0	0	0	0	0	0	0	0	#NULL!
2002-11-25	2002	1939-10-15	1	63.11	1	3	1498	0	1	2003-10-01	2003-10-01	0.85	0	#NULL!	1	0	0	0	0	0	0	0	0	0	0	0	1
2010-10-20	2010	1947-09-15	0	63.1	4	1	1420	1	0	#NULL!	2013-12-31	3.2	0	#NULL!	0	0	0	0	0	0	1	1	1	0	0	0	#NULL!
2011-12-22	2011	1948-11-15	1	63.1	3	3	1460	0	1	2013-05-24	2013-05-24	1.42	0	#NULL!	1	0	0	0	0	1	0	0	0	0	0	0	1
2000-02-23	2000	1937-01-15	1	63.1	3	2	1459	1	1	2004-11-05	2004-11-05	4.7	0	#NULL!	0	0	0	0	0	0	0	0	0	0	0	0	5
2001-02-19	2001	1938-01-15	1	63.1	2	2	1419	1	1	2003-04-03	2003-04-03	2.12	0	#NULL!	1	0	0	0	0	0	0	0	0	0	0	0	2
2012-11-21	2012	1949-10-15	1	63.1	2	2	1460	0	0	#NULL!	2013-12-31	1.11	0	#NULL!	1	0	0	0	0	0	0	0	0	0	0	0	#NULL!
2013-10-23	2013	1950-09-15	1	63.1	2	2	1419	1	0	#NULL!	2013-12-31	0.19	0	#NULL!	1	0	0	0	0	0	0	0	0	0	0	0	#NULL!
2004-07-21	2004	1941-06-15	1	63.1	1	1	1419	1	1	2007-06-19	2007-06-19	2.91	0	#NULL!	0	0	0	0	0	0	0	0	0	0	0	1	3
2001-02-19	2001	1938-01-15	1	63.1	1	3	141	1	1	2001-09-09	2001-09-09	0.55	0	#NULL!	1	0	0	0	0	0	0	0	0	0	0	0	1
2012-11-15	2012	1949-10-15	1	63.09	3	1	1453	1	1	2013-08-22	2013-08-22	0.77	0	#NULL!	0	0	0	0	0	0	1	0	0	0	0	0	1
2012-05-17	2012	1949-04-15	1	63.09	3	2	1419	1	1	2013-12-11	2013-12-11	1.57	0	#NULL!	1	0	0	0	0	0	0	0	0	0	0	0	2
2008-04-15	2008	1945-03-15	1	63.09	1	3	1479	0	0	#NULL!	2013-12-31	5.71	1	2012-03-26	1	0	0	0	0	0	0	0	0	0	0	0	#NULL!
2009-10-14	2009	1946-09-15	1	63.08	3	2	1489	0	1	2011-04-24	2011-04-24	1.52	0	#NULL!	1	1	0	0	0	0	1	0	1	0	0	0	2
2011-07-14	2011	1948-06-15	0	63.08	3	2	1479	0	0	#NULL!	2013-12-31	2.47	0	#NULL!	1	0	0	0	0	0	0	0	0	0	0	0	#NULL!
2002-08-13	2002	1939-07-15	1	63.08	3	2	1419	1	0	#NULL!	2013-12-31	11.38	0	#NULL!	0	0	0	0	0	0	0	0	0	0	0	0	#NULL!
2012-08-13	2012	1949-07-15	1	63.08	3	3	1419	1	0	#NULL!	2013-12-31	1.38	0	#NULL!	1	0	0	0	0	0	0	0	0	0	0	0	#NULL!
2004-01-15	2004	1940-12-15	1	63.08	2	2	1489	0	1	2008-12-11	2008-12-11	4.91	1	2004-10-27	1	0	0	0	0	1	1	1	0	0	0	0	5
2011-12-15	2011	1948-11-15	1	63.08	1	3	1450	1	1	2013-05-31	2013-05-31	1.46	0	#NULL!	1	0	0	0	0	0	0	0	0	0	0	0	1
2003-09-12	2003	1940-08-15	1	63.07	3	3	1450	1	1	2004-11-20	2004-11-20	1.19	0	#NULL!	0	0	0	0	0	1	0	0	0	0	0	0	1
2004-11-11	2004	1941-10-15	1	63.07	3	3	1459	1	1	2007-04-18	2007-04-18	2.43	0	#NULL!	0	0	0	0	0	1	0	0	0	0	0	0	2
2002-11-08	2002	1939-10-15	1	63.07	3	2	1479	0	1	2005-01-05	2005-01-05	2.16	0	#NULL!	0	0	0	0	0	0	1	0	1	0	0	0	2
2002-01-11	2002	1938-12-15	1	63.07	2	1	1412	1	1	2002-07-10	2002-07-10	0.49	0	#NULL!	1	0	0	0	0	0	1	0	0	0	0	0	0
2004-07-12	2004	1941-06-15	1	63.07	2	1	1460	0	1	2005-02-10	2005-02-10	0.58	0	#NULL!	0	0	0	0	0	0	0	0	0	0	0	0	1
2006-05-11	2006	1943-04-15	1	63.07	2	1	1619	0	1	2007-01-20	2007-01-20	0.7	0	#NULL!	1	0	0	0	0	0	1	0	0	0	0	0	1
2011-02-10	2011	1948-01-15	0	63.07	1	1	1419	1	0	#NULL!	2013-12-31	2.89	0	#NULL!	1	0	0	0	0	0	0	0	0	0	0	1	#NULL!
2009-04-08	2009	1946-03-15	1	63.07	1	2	1419	1	1	2009-12-01	2009-12-01	0.65	0	#NULL!	1	0	0	0	0	0	1	1	0	0	0	0	1
2007-01-08	2007	1943-12-15	1	63.07	1	2	1479	0	1	2012-09-19	2012-09-19	5.7	0	#NULL!	1	0	0	0	0	0	0	0	0	0	0	0	6
2000-08-08	2000	1937-07-15	1	63.07	1	1	1470	0	1	2001-12-25	2001-12-25	1.38	0	#NULL!	0	0	0	0	0	1	1	0	0	0	0	0	1
2011-05-10	2011	1948-04-15	0	63.07	1	3	1453	1	0	#NULL!	2013-12-31	2.64	0	#NULL!	0	0	0	0	0	1	1	1	0	0	0	0	#NULL!
2007-03-13	2007	1944-02-15	1	63.07	1	1	1431	1	1	2007-09-19	2007-09-19	0.52	0	#NULL!	0	0	0	0	0	0	0	0	0	0	0	0	1
2010-08-04	2010	1947-07-15	0	63.06	4	2	1479	0	0	#NULL!	2013-12-31	3.41	0	#NULL!	1	1	0	0	0	0	1	1	1	0	0	0	#NULL!
2008-04-07	2008	1945-03-15	1	63.06	3	1	1439	1	1	2008-12-10	2008-12-10	0.68	0	#NULL!	1	0	0	0	0	0	0	0	0	0	0	0	1
2011-04-06	2011	1948-03-15	1	63.06	3	2	1459	1	0	#NULL!	2013-12-31	2.74	0	#NULL!	1	0	0	0	0	1	1	1	0	0	0	1	#NULL!
2007-05-08	2007	1944-04-15	1	63.06	3	3	1439	1	1	2012-12-13	2012-12-13	5.6	0	#NULL!	1	0	0	0	0	1	0	0	0	0	0	0	6
2002-03-07	2002	1939-02-15	1	63.06	2	2	1460	0	1	2004-07-25	2004-07-25	2.38	0	#NULL!	0	1	0	0	0	0	1	0	0	0	0	0	2
2007-11-07	2007	1944-10-15	1	63.06	2	2	1489	0	0	#NULL!	2013-12-31	6.15	0	#NULL!	0	0	0	0	0	1	1	1	0	0	0	0	#NULL!
2007-11-08	2007	1944-10-15	1	63.06	2	2	1463	0	0	#NULL!	2013-12-31	6.15	0	#NULL!	1	0	0	0	0	0	1	1	0	0	0	0	#NULL!
2008-11-05	2008	1945-10-15	0	63.06	2	1	1419	1	0	#NULL!	2013-12-31	5.15	0	#NULL!	1	0	0	0	0	0	1	1	0	0	0	0	#NULL!
2011-06-08	2011	1948-05-15	0	63.06	2	3	1450	1	1	2012-04-05	2012-04-05	0.83	0	#NULL!	1	0	0	0	0	1	1	0	0	0	0	0	1
2013-02-06	2013	1950-01-15	1	63.06	1	3	1489	0	0	#NULL!	2013-12-31	0.9	0	#NULL!	1	0	0	0	0	1	1	1	0	0	0	1	#NULL!
2010-04-07	2010	1947-03-15	1	63.06	1	3	1456	1	1	2011-02-08	2011-02-08	0.84	0	#NULL!	0	0	0	0	0	1	1	0	1	0	0	0	1
2010-08-05	2010	1947-07-15	0	63.06	1	2	1489	0	0	#NULL!	2013-12-31	3.41	0	#NULL!	1	0	0	0	0	1	1	0	0	1	0	0	#NULL!
2004-01-08	2004	1940-12-15	1	63.06	1	2	1469	0	0	#NULL!	2013-12-31	9.98	0	#NULL!	1	0	0	0	0	0	0	0	1	0	0	0	#NULL!
2008-09-01	2008	1945-08-15	1	63.05	3	2	1479	0	1	2011-04-04	2011-04-04	2.59	0	#NULL!	1	0	0	0	0	0	1	1	1	0	0	0	3
2007-02-02	2007	1944-01-15	0	63.05	3	1	1479	0	0	#NULL!	2013-12-31	6.91	0	#NULL!	0	0	0	0	0	0	0	0	1	0	0	0	#NULL!
2011-03-04	2011	1948-02-15	1	63.05	3	1	1431	1	0	#NULL!	2013-12-31	2.83	0	#NULL!	0	0	0	0	0	0	1	1	0	0	0	1	#NULL!
2007-03-05	2007	1944-02-15	1	63.05	3	3	1489	0	1	2010-05-01	2010-05-01	3.16	0	#NULL!	0	0	0	0	0	0	0	0	0	0	0	0	3
2005-11-01	2005	1942-10-15	1	63.05	2	2	1450	1	1	2007-02-21	2007-02-21	1.31	0	#NULL!	0	0	0	0	0	0	0	0	0	0	0	0	1
2002-03-04	2002	1939-02-15	1	63.05	2	3	1489	0	0	#NULL!	2013-12-31	11.83	0	#NULL!	1	0	0	0	0	0	0	0	0	0	0	0	#NULL!
2007-12-04	2007	1944-11-15	0	63.05	2	2	1479	0	0	#NULL!	2013-12-31	6.08	0	#NULL!	1	1	0	0	0	0	1	0	1	1	0	0	#NULL!
2012-10-03	2012	1949-09-15	1	63.05	2	2	1450	1	0	#NULL!	2013-12-31	1.24	0	#NULL!	0	0	0	0	0	0	0	0	0	0	0	0	#NULL!
2004-02-02	2004	1941-01-15	1	63.05	2	2	1419	1	0	#NULL!	2013-12-31	9.91	1	2010-01-18	0	0	0	0	0	0	0	0	0	0	0	0	#NULL!
2012-01-02	2012	1948-12-15	1	63.05	1	2	1479	0	0	#NULL!	2013-12-31	2	0	#NULL!	0	0	0	0	0	0	1	0	0	0	0	0	#NULL!
2012-04-02	2012	1949-03-15	1	63.05	1	3	1439	1	0	#NULL!	2013-12-31	1.75	0	#NULL!	0	0	0	0	0	1	0	0	0	0	0	0	#NULL!
2006-05-01	2006	1943-04-15	1	63.04	3	3	1489	0	1	2007-01-26	2007-01-26	0.74	0	#NULL!	1	0	0	1	0	0	0	0	0	0	0	1	1
2010-04-28	2010	1947-04-15	1	63.04	3	3	1450	1	0	#NULL!	2013-12-31	3.68	0	#NULL!	1	0	0	0	0	1	0	0	0	0	0	0	#NULL!
2007-11-29	2007	1944-11-15	1	63.04	2	2	1489	0	1	2013-01-10	2013-01-10	5.12	0	#NULL!	1	0	0	0	0	0	0	0	0	0	0	0	5
2006-12-01	2006	1943-11-15	1	63.04	2	2	1479	0	0	#NULL!	2013-12-31	7.08	0	#NULL!	1	0	0	0	0	0	1	0	1	0	0	0	#NULL!
2010-03-03	2010	1947-02-15	1	63.04	1	2	147	0	0	#NULL!	2013-12-31	3.83	0	#NULL!	1	0	0	0	0	1	1	0	0	0	0	0	#NULL!
2012-01-31	2012	1949-01-15	1	63.04	1	1	1459	1	0	#NULL!	2013-12-31	1.92	0	#NULL!	1	0	0	1	0	1	1	0	0	0	0	0	#NULL!
2000-05-01	2000	1937-04-15	1	63.04	1	2	1419	1	1	2001-04-10	2001-04-10	0.94	0	#NULL!	0	0	0	0	0	1	0	1	1	0	0	0	1
2009-05-29	2009	1946-05-15	1	63.04	1	1	1431	1	1	2009-07-23	2009-07-23	0.15	0	#NULL!	0	1	0	0	0	1	1	1	0	0	0	0	0
2004-12-01	2004	1941-11-15	1	63.04	1	3	1479	0	0	#NULL!	2013-12-31	9.08	0	#NULL!	0	0	0	0	0	0	0	0	0	0	0	0	#NULL!
2003-09-26	2003	1940-09-15	0	63.03	4	2	1479	0	1	2007-02-06	2007-02-06	3.36	0	#NULL!	0	0	0	0	0	0	1	0	0	0	0	0	3
2012-07-25	2012	1949-07-15	1	63.03	3	1	1450	1	1	2013-02-19	2013-02-19	0.57	0	#NULL!	1	0	0	0	0	1	1	1	0	1	0	0	1
2011-10-26	2011	1948-10-15	1	63.03	3	1	1431	1	0	#NULL!	2013-11-06	2.03	0	#NULL!	1	0	0	0	0	0	1	1	0	0	0	1	#NULL!
2008-02-26	2008	1945-02-15	1	63.03	2	1	1450	1	0	#NULL!	2013-12-31	5.85	0	#NULL!	1	0	0	0	0	0	1	0	0	0	0	1	#NULL!
2007-01-25	2007	1944-01-15	1	63.03	2	2	1460	0	1	2009-07-17	2009-07-17	2.48	0	#NULL!	1	0	0	0	0	0	0	1	0	0	0	0	2
2007-05-22	2007	1944-05-15	1	63.02	3	1	1460	0	1	2008-06-13	2008-06-13	1.06	0	#NULL!	1	0	0	0	0	0	0	0	0	0	0	0	1
2011-08-24	2011	1948-08-15	1	63.02	3	2	1479	0	1	2012-01-15	2012-01-15	0.39	0	#NULL!	1	0	0	0	0	0	0	0	0	0	0	0	0
2007-02-22	2007	1944-02-15	1	63.02	2	2	1469	0	1	2007-08-18	2007-08-18	0.48	0	#NULL!	1	0	0	0	0	1	1	1	0	1	0	0	0
2011-01-17	2011	1948-01-15	1	63.01	4	3	1489	0	1	2012-03-02	2012-03-02	1.12	0	#NULL!	1	0	0	0	0	0	1	0	0	0	0	0	1
2006-04-20	2006	1943-04-15	1	63.01	3	2	1430	1	1	2010-09-18	2010-09-18	4.41	0	#NULL!	1	0	0	0	0	0	1	0	0	0	0	0	4
2000-04-17	2000	1937-04-15	1	63.01	3	1	1489	0	1	2002-08-24	2002-08-24	2.35	0	#NULL!	0	1	0	0	0	0	1	1	0	0	0	0	2
2009-05-18	2009	1946-05-15	1	63.01	3	1	1450	1	1	2010-06-24	2010-06-24	1.1	0	#NULL!	0	1	0	0	0	0	1	1	0	0	0	0	1
2007-01-18	2007	1944-01-15	1	63.01	2	3	1481	0	1	2007-10-13	2007-10-13	0.73	0	#NULL!	1	0	0	0	0	1	1	1	0	0	0	0	1
2001-03-19	2001	1938-03-15	1	63.01	1	2	1470	0	0	#NULL!	2013-12-31	12.79	0	#NULL!	1	0	0	0	0	0	0	0	0	0	0	0	#NULL!
2006-10-13	2006	1943-10-15	1	63	4	1	1611	0	1	2012-01-12	2012-01-12	5.25	0	#NULL!	1	0	0	0	0	0	1	1	0	0	0	0	5
2004-10-15	2004	1941-10-15	0	63	3	3	1619	0	1	2010-06-29	2010-06-29	5.7	0	#NULL!	0	0	0	0	0	0	0	0	0	0	0	0	6
2004-08-16	2004	1941-08-15	1	63	3	1	1455	1	1	2005-04-13	2005-04-13	0.66	0	#NULL!	0	0	0	0	0	1	0	0	0	0	0	0	1
2000-04-14	2000	1937-04-15	1	63	2	1	1416	1	1	2001-09-24	2001-09-24	1.45	0	#NULL!	0	0	0	0	0	0	0	0	0	0	0	0	1
2005-09-14	2005	1942-09-15	1	63	1	1	1479	0	0	#NULL!	2013-12-31	8.3	0	#NULL!	1	0	0	0	0	0	0	0	0	0	0	0	#NULL!
2009-09-16	2009	1946-09-15	0	63	1	3	1479	0	0	#NULL!	2013-12-31	4.29	0	#NULL!	1	0	0	0	0	1	1	1	1	0	0	0	#NULL!
2009-08-16	2009	1946-08-15	0	63	1	3	1479	0	0	#NULL!	2013-12-31	4.38	0	#NULL!	1	0	0	0	0	0	1	1	1	0	0	0	#NULL!
2012-11-14	2012	1949-11-15	1	63	1	3	1461	0	0	#NULL!	2013-12-31	1.13	0	#NULL!	1	0	0	0	0	0	0	0	0	0	0	0	#NULL!
2011-11-14	2011	1948-11-15	1	63	1	1	1412	1	0	#NULL!	2013-12-31	2.13	0	#NULL!	1	0	0	0	0	1	1	0	0	1	0	0	#NULL!
2010-08-13	2010	1947-08-15	0	63	1	1	1450	1	0	#NULL!	2013-12-31	3.38	0	#NULL!	1	0	0	0	0	0	1	1	0	0	0	1	#NULL!
2004-03-10	2004	1941-03-15	1	62.99	3	2	1452	1	1	2004-06-08	2004-06-08	0.25	0	#NULL!	0	1	0	1	0	0	1	0	1	1	1	0	0
2001-11-12	2001	1938-11-15	1	62.99	3	1	1420	1	1	2002-03-29	2002-03-29	0.38	0	#NULL!	0	1	0	0	0	0	1	0	0	0	0	0	0
2009-02-12	2009	1946-02-15	0	62.99	3	1	1450	1	1	2013-03-18	2013-03-18	4.09	0	#NULL!	1	0	0	0	0	0	1	0	1	0	0	0	4
2009-03-12	2009	1946-03-15	1	62.99	2	2	1489	0	1	2009-05-16	2009-05-16	0.18	0	#NULL!	1	1	0	1	0	1	1	1	0	0	0	0	0
2010-11-12	2010	1947-11-15	1	62.99	1	2	1619	0	1	2011-10-11	2011-10-11	0.91	0	#NULL!	0	0	0	0	0	0	1	0	0	0	0	0	1
2011-12-13	2011	1948-12-15	1	62.99	1	3	1450	1	0	#NULL!	2013-12-31	2.05	0	#NULL!	1	0	0	0	0	0	0	0	0	0	0	1	#NULL!
2012-05-08	2012	1949-05-15	1	62.98	3	3	1412	1	1	2012-12-17	2012-12-17	0.61	0	#NULL!	1	0	0	0	0	0	0	0	0	0	0	0	1
2007-03-07	2007	1944-03-15	1	62.98	3	2	1429	1	0	#NULL!	2013-12-31	6.82	0	#NULL!	0	0	0	0	0	1	1	0	0	0	0	1	#NULL!
2011-05-10	2011	1948-05-15	1	62.98	3	1	1489	0	1	2011-12-06	2011-12-06	0.57	1	2011-06-13	1	0	0	0	0	1	1	0	0	1	0	0	1
2004-10-08	2004	1941-10-15	1	62.98	2	1	1479	0	1	2005-12-20	2005-12-20	1.2	0	#NULL!	1	0	0	0	0	0	0	0	0	0	0	0	1
2010-07-07	2010	1947-07-15	1	62.98	2	2	1410	1	0	#NULL!	2013-12-31	3.49	0	#NULL!	1	0	0	0	0	0	0	0	0	0	0	0	#NULL!
2009-02-06	2009	1946-02-15	0	62.98	2	1	1489	0	0	#NULL!	2013-12-23	4.88	0	#NULL!	1	0	0	0	0	0	0	0	0	0	0	0	#NULL!
2003-09-09	2003	1940-09-15	1	62.98	1	1	1469	0	0	#NULL!	2013-12-31	10.31	0	#NULL!	1	0	0	0	0	0	1	1	1	0	0	0	#NULL!
2012-10-09	2012	1949-10-15	1	62.98	1	3	1463	0	0	#NULL!	2013-12-31	1.23	0	#NULL!	1	0	0	0	0	0	1	0	0	0	0	0	#NULL!
2008-04-07	2008	1945-04-15	1	62.98	1	2	1479	0	0	#NULL!	2013-12-31	5.73	0	#NULL!	1	1	0	0	0	0	1	0	0	0	0	0	#NULL!
2010-08-06	2010	1947-08-15	1	62.98	1	1	1479	0	0	#NULL!	2013-12-31	3.4	0	#NULL!	1	0	0	0	0	0	1	0	0	0	0	0	#NULL!
2006-02-02	2006	1943-02-15	1	62.97	3	2	1619	0	0	#NULL!	2013-12-31	7.91	0	#NULL!	1	0	0	0	0	0	0	0	0	0	0	0	#NULL!
2001-02-02	2001	1938-02-15	1	62.97	3	3	1479	0	1	2001-12-07	2001-12-07	0.84	0	#NULL!	1	0	0	0	0	0	0	0	0	0	0	0	1
2005-10-05	2005	1942-10-15	1	62.97	3	2	1419	1	1	2006-06-03	2006-06-03	0.66	0	#NULL!	1	0	0	0	0	0	0	0	0	0	0	0	1
2007-06-05	2007	1944-06-15	1	62.97	3	1	1469	0	0	#NULL!	2013-12-31	6.57	0	#NULL!	1	0	0	0	0	0	0	0	0	0	0	1	#NULL!
2010-10-04	2010	1947-10-15	1	62.97	3	1	1409	1	0	#NULL!	2013-12-31	3.24	0	#NULL!	1	0	0	0	0	0	0	0	1	0	0	0	#NULL!
2009-11-05	2009	1946-11-15	1	62.97	2	1	1419	1	0	#NULL!	2013-12-31	4.15	0	#NULL!	0	0	0	0	0	0	1	0	1	0	0	0	#NULL!
2010-10-05	2010	1947-10-15	1	62.97	2	3	1610	0	0	#NULL!	2013-12-31	3.24	0	#NULL!	1	0	0	0	0	0	1	1	0	0	0	0	#NULL!
2012-07-04	2012	1949-07-15	1	62.97	2	2	1450	1	0	#NULL!	2013-12-31	1.49	0	#NULL!	1	0	0	0	0	1	0	0	0	0	0	0	#NULL!
2009-02-02	2009	1946-02-15	1	62.97	1	2	1450	1	0	#NULL!	2013-12-31	4.91	0	#NULL!	1	0	0	0	0	0	1	0	0	0	0	0	#NULL!
2004-01-05	2004	1941-01-15	1	62.97	1	3	1479	0	0	#NULL!	2013-12-31	9.99	0	#NULL!	1	0	0	0	0	0	0	0	0	0	0	0	#NULL!
2000-09-05	2000	1937-09-15	1	62.97	1	1	147	0	1	2000-12-16	2000-12-16	0.28	0	#NULL!	1	0	0	0	0	0	0	0	0	0	0	0	0
2002-08-01	2002	1939-08-15	1	62.96	4	2	1419	1	1	2004-01-01	2004-01-01	1.42	0	#NULL!	0	0	0	0	1	0	0	0	0	0	0	0	1
2001-06-01	2001	1938-06-15	1	62.96	2	1	1469	0	0	#NULL!	2003-06-25	2.06	0	#NULL!	0	0	0	0	0	0	0	0	0	0	0	0	#NULL!
2009-12-01	2009	1946-12-15	0	62.96	2	2	1439	1	0	#NULL!	2013-12-31	4.08	0	#NULL!	0	0	0	0	0	0	1	0	1	1	0	0	#NULL!
2004-11-29	2004	1941-12-15	1	62.96	2	2	1479	0	1	2006-06-12	2006-06-12	1.53	0	#NULL!	1	0	0	0	0	0	0	0	0	0	0	0	2
2007-05-02	2007	1944-05-15	1	62.96	2	1	1450	1	1	2007-10-11	2007-10-11	0.44	0	#NULL!	1	0	0	0	0	0	0	0	0	0	0	0	0
2008-09-01	2008	1945-09-15	1	62.96	1	1	1469	0	0	#NULL!	2013-12-31	5.33	0	#NULL!	1	0	0	0	0	1	1	1	1	0	0	0	#NULL!
2012-04-30	2012	1949-05-15	1	62.96	1	2	1450	1	0	#NULL!	2013-12-31	1.67	0	#NULL!	1	0	0	0	0	0	1	0	1	0	0	1	#NULL!
2011-09-01	2011	1948-09-15	1	62.96	1	1	1414	1	0	#NULL!	2013-12-31	2.33	0	#NULL!	1	0	0	0	0	1	0	1	0	0	0	1	#NULL!
2009-04-29	2009	1946-05-15	1	62.96	1	2	1611	0	0	#NULL!	2013-12-31	4.67	0	#NULL!	0	1	0	0	0	0	1	0	0	0	0	0	#NULL!
2002-04-01	2002	1939-04-15	1	62.96	1	1	1483	0	1	2004-08-17	2004-08-17	2.38	0	#NULL!	1	0	0	0	0	0	0	0	0	0	0	0	2
2005-08-30	2005	1942-09-15	1	62.96	1	1	1450	1	1	2006-03-25	2006-03-25	0.57	0	#NULL!	1	0	0	0	0	0	0	0	0	0	0	0	1
2000-05-26	2000	1937-06-15	1	62.95	2	2	1412	1	0	#NULL!	2013-12-31	13.6	0	#NULL!	0	0	0	0	0	0	0	0	0	0	0	0	#NULL!
2007-08-28	2007	1944-09-15	1	62.95	2	2	1499	0	0	#NULL!	2013-12-31	6.34	0	#NULL!	0	0	0	0	0	1	0	1	1	0	0	1	#NULL!
2009-04-27	2009	1946-05-15	1	62.95	2	3	1479	0	1	2010-04-08	2010-04-08	0.95	0	#NULL!	1	0	0	0	0	1	1	0	0	0	0	0	1
2012-03-26	2012	1949-04-15	1	62.95	1	2	1469	0	0	#NULL!	2013-12-31	1.77	0	#NULL!	1	0	0	0	0	0	1	1	0	0	0	0	#NULL!
2007-07-30	2007	1944-08-15	0	62.95	1	2	1479	0	0	#NULL!	2013-12-31	6.42	0	#NULL!	1	0	0	0	0	0	1	1	1	0	0	0	#NULL!
2007-10-29	2007	1944-11-15	1	62.95	1	1	1459	1	0	#NULL!	2013-12-31	6.17	1	2009-09-12	1	0	0	0	0	0	0	0	1	0	0	0	#NULL!
2002-12-23	2002	1940-01-15	1	62.94	2	2	1489	0	1	2008-03-02	2008-03-02	5.19	0	#NULL!	0	0	0	0	0	0	0	0	0	0	0	0	5
2011-07-25	2011	1948-08-15	1	62.94	1	1	1459	1	0	#NULL!	2013-12-31	2.44	0	#NULL!	0	0	0	0	0	0	0	0	0	0	0	0	#NULL!
2012-09-20	2012	1949-10-15	0	62.93	4	1	1431	1	0	#NULL!	2013-12-31	1.28	0	#NULL!	1	1	0	0	0	1	1	1	0	0	0	1	#NULL!
2009-03-19	2009	1946-04-15	1	62.93	3	2	1419	1	1	2009-10-05	2009-10-05	0.55	0	#NULL!	1	0	0	0	0	0	0	0	0	0	0	1	1
2010-03-19	2010	1947-04-15	1	62.93	3	1	1450	1	0	#NULL!	2013-12-31	3.79	0	#NULL!	0	0	0	0	0	0	0	0	0	0	0	1	#NULL!
2011-09-21	2011	1948-10-15	1	62.93	3	1	1479	0	1	2012-06-26	2012-06-26	0.76	0	#NULL!	1	0	0	0	0	0	1	0	0	0	0	0	1
2002-10-22	2002	1939-11-15	1	62.93	1	3	1463	0	1	2008-01-21	2008-01-21	5.25	0	#NULL!	0	1	0	0	0	0	1	0	0	0	0	0	5
2003-04-22	2003	1940-05-15	1	62.93	1	3	1469	0	0	#NULL!	2013-12-31	10.69	0	#NULL!	0	0	0	0	0	0	0	0	0	0	0	0	#NULL!
2009-12-21	2009	1947-01-15	1	62.93	1	3	1431	1	1	2010-04-27	2010-04-27	0.35	0	#NULL!	1	1	0	0	0	1	1	0	1	0	0	0	0
2005-04-14	2005	1942-05-15	1	62.92	4	2	1481	0	1	2013-06-20	2013-06-20	8.18	0	#NULL!	1	0	0	0	0	0	0	1	0	0	0	0	8
2009-09-15	2009	1946-10-15	1	62.92	3	3	1431	1	1	2010-07-06	2010-07-06	0.8	0	#NULL!	1	0	0	0	0	1	1	0	0	0	0	0	1
2008-02-15	2008	1945-03-15	1	62.92	3	3	1479	0	1	2013-04-24	2013-04-24	5.19	0	#NULL!	1	0	0	0	0	0	0	0	0	0	0	0	5
2003-09-16	2003	1940-10-15	1	62.92	2	2	1469	0	0	#NULL!	2013-12-31	10.29	0	#NULL!	1	0	0	0	0	1	0	0	0	0	0	0	#NULL!
2000-06-16	2000	1937-07-15	1	62.92	1	2	1453	1	1	2001-12-19	2001-12-19	1.51	0	#NULL!	0	0	0	0	0	0	0	0	0	0	0	0	2
2002-10-17	2002	1939-11-15	1	62.92	1	1	146	0	0	#NULL!	2013-12-31	11.21	1	2005-05-16	0	0	0	0	0	0	0	0	0	0	0	0	#NULL!
2009-07-16	2009	1946-08-15	1	62.92	1	3	1459	1	0	#NULL!	2013-12-31	4.46	0	#NULL!	1	1	0	0	0	0	1	1	0	0	0	0	#NULL!
2012-12-18	2012	1950-01-15	1	62.92	1	3	1450	1	0	#NULL!	2013-12-31	1.03	0	#NULL!	1	0	0	0	0	0	0	0	0	0	0	0	#NULL!
2006-03-14	2006	1943-04-15	1	62.91	3	2	1479	0	1	2010-08-14	2010-08-14	4.42	0	#NULL!	1	0	0	0	0	0	0	0	0	0	0	0	4
2012-12-12	2012	1950-01-15	1	62.91	3	3	1460	0	0	#NULL!	2013-12-31	1.05	0	#NULL!	0	0	0	0	0	1	1	1	1	0	0	0	#NULL!
2011-04-14	2011	1948-05-15	1	62.91	3	1	1431	1	1	2013-03-28	2013-03-28	1.95	0	#NULL!	1	0	0	0	0	1	1	1	0	0	0	1	2
2010-09-13	2010	1947-10-15	1	62.91	1	2	1459	1	1	2011-03-18	2011-03-18	0.51	0	#NULL!	1	0	0	0	0	0	0	0	0	0	0	0	1
2010-05-12	2010	1947-06-15	1	62.91	1	1	1619	0	0	#NULL!	2013-12-31	3.64	0	#NULL!	0	0	0	0	0	0	1	0	0	0	0	0	#NULL!
2008-02-12	2008	1945-03-15	1	62.91	1	2	1465	0	0	#NULL!	2008-08-21	0.52	0	#NULL!	1	0	0	0	0	0	0	0	0	0	0	0	#NULL!
2001-01-08	2001	1938-02-15	1	62.9	4	2	1479	0	1	2003-08-03	2003-08-03	2.57	0	#NULL!	1	0	0	0	0	1	0	0	0	0	0	0	3
2012-02-06	2012	1949-03-15	1	62.9	3	3	1452	1	0	#NULL!	2013-12-31	1.9	1	2013-01-07	1	0	0	0	0	0	1	1	1	0	0	0	#NULL!
2011-02-09	2011	1948-03-15	1	62.9	3	3	1420	1	0	#NULL!	2013-12-31	2.89	0	#NULL!	1	0	0	0	0	1	1	0	0	0	0	0	#NULL!
2010-03-09	2010	1947-04-15	1	62.9	3	2	1489	0	0	#NULL!	2013-12-31	3.81	0	#NULL!	1	1	0	0	0	0	0	0	0	0	0	0	#NULL!
2009-05-11	2009	1946-06-15	1	62.9	3	1	1489	0	1	2011-02-09	2011-02-09	1.75	0	#NULL!	0	0	0	0	0	0	0	0	0	0	0	0	2
2009-09-08	2009	1946-10-15	1	62.9	3	3	1452	1	1	2010-09-12	2010-09-12	1.01	0	#NULL!	1	0	0	0	0	0	1	0	0	0	0	0	1
2008-03-10	2008	1945-04-15	1	62.9	2	2	1419	1	1	2008-11-02	2008-11-02	0.65	0	#NULL!	1	0	0	0	0	0	0	0	0	0	0	0	1
2008-02-06	2008	1945-03-15	1	62.9	2	2	1431	1	1	2008-12-13	2008-12-13	0.85	0	#NULL!	0	0	0	0	0	0	0	0	0	0	0	1	1
2012-02-06	2012	1949-03-15	1	62.9	2	2	1419	1	1	2013-07-08	2013-07-08	1.42	0	#NULL!	1	0	0	0	0	1	1	0	0	0	0	0	1
2011-11-08	2011	1948-12-15	1	62.9	2	1	1479	0	0	#NULL!	2013-12-31	2.15	0	#NULL!	0	1	0	0	0	0	1	0	0	0	0	0	#NULL!
2002-09-09	2002	1939-10-15	1	62.9	2	1	1459	1	1	2003-06-09	2003-06-09	0.75	0	#NULL!	0	0	0	0	0	0	0	0	0	0	0	0	1
2009-04-09	2009	1946-05-15	1	62.9	2	2	1611	0	0	#NULL!	2013-12-31	4.73	0	#NULL!	1	0	0	0	1	0	1	0	0	0	0	0	#NULL!
2004-03-11	2004	1941-04-15	1	62.9	2	2	1419	1	1	2005-01-12	2005-01-12	0.84	0	#NULL!	0	0	0	0	0	0	0	0	0	0	0	0	1
2011-08-11	2011	1948-09-15	1	62.9	1	2	1479	0	0	#NULL!	2013-12-31	2.39	0	#NULL!	0	0	0	0	0	0	1	1	0	0	0	0	#NULL!
2011-03-12	2011	1948-04-15	1	62.9	1	1	1489	0	1	2012-09-08	2012-09-08	1.49	0	#NULL!	1	0	0	0	0	0	1	0	0	0	0	0	1
2008-03-11	2008	1945-04-15	1	62.9	1	2	1469	0	1	2010-12-14	2010-12-14	2.76	0	#NULL!	1	1	0	1	0	1	1	0	0	1	0	0	3
2001-10-08	2001	1938-11-15	1	62.9	1	1	147	0	1	2011-07-13	2011-07-13	9.76	0	#NULL!	1	0	0	0	0	0	1	1	0	0	0	0	10
2003-02-06	2003	1940-03-15	1	62.9	1	1	1412	1	1	2004-04-02	2004-04-02	1.15	0	#NULL!	1	0	0	0	0	0	0	0	0	0	0	0	1
2011-09-05	2011	1948-10-15	1	62.89	3	2	1461	0	1	2011-11-22	2011-11-22	0.21	0	#NULL!	1	1	0	0	0	0	1	0	0	0	0	0	0
2013-10-04	2013	1950-11-15	1	62.89	3	3	1419	1	0	#NULL!	2013-12-31	0.24	0	#NULL!	0	0	0	0	0	0	0	0	0	1	0	1	#NULL!
2010-12-06	2010	1948-01-15	1	62.89	3	1	1450	1	0	#NULL!	2013-12-31	3.07	0	#NULL!	1	0	0	0	0	0	0	0	0	0	0	0	#NULL!
2008-05-07	2008	1945-06-15	1	62.89	3	2	1450	1	0	#NULL!	2013-12-31	5.65	0	#NULL!	1	1	0	0	0	0	0	0	1	1	0	0	#NULL!
2012-05-07	2012	1949-06-15	1	62.89	3	2	1489	0	0	#NULL!	2013-12-31	1.65	0	#NULL!	1	0	0	0	0	0	1	0	1	0	0	0	#NULL!
2010-03-04	2010	1947-04-15	1	62.89	3	1	1450	1	0	#NULL!	2013-12-23	3.81	0	#NULL!	0	0	0	0	0	0	0	0	0	0	0	1	#NULL!
2011-07-08	2011	1948-08-15	1	62.89	2	2	1611	0	1	2011-10-16	2011-10-16	0.27	0	#NULL!	0	0	0	0	0	0	1	0	0	0	0	0	0
2007-03-08	2007	1944-04-15	1	62.89	1	3	1469	0	1	2009-01-12	2009-01-12	1.85	0	#NULL!	1	0	0	0	0	0	1	0	0	0	0	0	2
2009-10-06	2009	1946-11-15	1	62.89	1	1	1619	0	0	#NULL!	2013-12-31	4.24	0	#NULL!	1	0	0	0	0	0	0	0	0	0	0	1	#NULL!
2007-06-07	2007	1944-07-15	1	62.89	1	1	1419	1	0	#NULL!	2010-11-01	3.4	0	#NULL!	1	1	0	1	0	0	1	0	1	0	0	0	#NULL!
2009-11-06	2009	1946-12-15	1	62.89	1	1	1619	0	0	#NULL!	2013-12-31	4.15	0	#NULL!	1	0	0	0	0	0	1	0	1	0	0	0	#NULL!
2002-12-04	2002	1940-01-15	1	62.89	1	3	1479	0	1	2003-03-03	2003-03-03	0.24	0	#NULL!	0	0	0	0	0	0	0	0	0	0	0	0	0
2009-01-07	2009	1946-02-15	1	62.89	1	3	1412	1	0	#NULL!	2013-12-02	4.9	0	#NULL!	0	0	0	0	0	0	1	0	0	0	0	1	#NULL!
2005-11-01	2005	1942-12-15	1	62.88	3	2	1499	0	1	2007-01-10	2007-01-10	1.19	0	#NULL!	0	0	0	0	0	0	0	0	0	0	0	0	1
2010-07-01	2010	1947-08-15	1	62.88	2	2	1450	1	1	2012-01-01	2012-01-01	1.5	0	#NULL!	0	1	0	0	0	1	1	1	0	0	0	1	2
2002-09-02	2002	1939-10-15	1	62.88	1	1	1460	0	1	2006-08-20	2006-08-20	3.96	0	#NULL!	1	0	0	0	0	0	1	0	0	1	0	0	4
2003-01-30	2003	1940-03-15	1	62.88	1	3	1479	0	0	#NULL!	2013-12-31	10.92	0	#NULL!	1	0	0	0	0	0	0	0	0	0	0	0	#NULL!
2001-12-03	2001	1939-01-15	1	62.88	1	2	1481	0	1	2002-05-08	2002-05-08	0.43	0	#NULL!	1	0	0	0	0	0	0	0	0	0	0	0	0
2007-07-03	2007	1944-08-15	1	62.88	1	2	1450	1	1	2009-07-07	2009-07-07	2.01	0	#NULL!	1	0	0	0	0	0	0	0	0	0	0	1	2
2009-12-01	2009	1947-01-15	1	62.88	1	3	1419	1	1	2011-12-13	2011-12-13	2.03	0	#NULL!	1	0	0	0	0	0	1	1	0	0	0	0	2
2010-08-29	2010	1947-10-15	1	62.87	3	1	1412	1	1	2011-02-16	2011-02-16	0.47	0	#NULL!	1	0	0	0	0	0	0	0	0	0	0	0	0
2011-10-31	2011	1948-12-15	1	62.87	2	1	1449	1	1	2012-05-31	2012-05-31	0.58	0	#NULL!	1	0	0	1	0	0	0	0	0	0	0	0	1
2004-04-28	2004	1941-06-15	1	62.87	2	3	1430	1	1	2007-07-12	2007-07-12	3.2	0	#NULL!	0	0	0	0	0	1	1	0	0	0	0	0	3
2005-03-28	2005	1942-05-15	1	62.87	1	3	1419	1	1	2006-01-11	2006-01-11	0.79	0	#NULL!	1	0	0	0	0	0	0	0	0	1	0	0	1
2012-07-30	2012	1949-09-15	1	62.87	1	3	1490	0	0	#NULL!	2013-12-31	1.42	0	#NULL!	1	1	0	1	0	0	0	1	0	0	0	0	#NULL!
2010-05-26	2010	1947-07-15	1	62.86	3	1	1450	1	0	#NULL!	2013-12-31	3.6	0	#NULL!	0	1	0	0	0	0	1	0	0	1	0	0	#NULL!
2012-12-25	2012	1950-02-15	1	62.86	3	2	1611	0	0	#NULL!	2013-12-31	1.02	0	#NULL!	1	0	0	0	0	1	1	1	0	0	0	0	#NULL!
2012-06-26	2012	1949-08-15	1	62.86	3	2	1431	1	0	#NULL!	2013-12-31	1.51	0	#NULL!	0	0	0	0	0	1	1	0	0	0	0	0	#NULL!
2002-06-26	2002	1939-08-15	1	62.86	2	3	1419	1	1	2003-12-15	2003-12-15	1.47	0	#NULL!	1	0	0	0	0	0	1	1	0	0	0	0	1
2001-03-23	2001	1938-05-15	1	62.86	1	2	1479	0	1	2001-12-16	2001-12-16	0.73	0	#NULL!	1	0	0	0	0	0	1	0	0	0	0	0	1
2003-08-25	2003	1940-10-15	1	62.86	1	3	1479	0	0	#NULL!	2013-12-31	10.35	1	2009-04-14	1	0	0	0	0	0	1	0	1	0	0	0	#NULL!
2010-12-27	2010	1948-02-15	0	62.86	1	3	1420	1	0	#NULL!	2013-12-31	3.01	0	#NULL!	0	0	0	0	0	1	0	0	0	0	0	0	#NULL!
2012-11-20	2012	1950-01-15	0	62.85	3	1	1459	1	1	2013-11-06	2013-11-06	0.96	0	#NULL!	1	0	0	0	0	0	0	0	0	0	0	0	1
2006-05-22	2006	1943-07-15	1	62.85	3	2	1499	0	0	#NULL!	2013-12-31	7.61	0	#NULL!	0	0	0	0	0	1	1	0	0	0	0	0	#NULL!
2010-09-20	2010	1947-11-15	1	62.85	2	2	1412	1	1	2012-02-21	2012-02-21	1.42	0	#NULL!	0	1	0	0	0	1	1	0	1	0	0	0	1
2013-02-18	2013	1950-04-15	1	62.85	1	3	1450	1	0	#NULL!	2013-12-31	0.87	0	#NULL!	1	0	0	0	0	0	1	1	0	0	0	0	#NULL!
2012-04-22	2012	1949-06-15	1	62.85	1	2	1453	1	1	2012-06-21	2012-06-21	0.16	0	#NULL!	1	0	0	0	0	0	0	0	0	0	0	0	0
2009-11-19	2009	1947-01-15	1	62.84	4	2	1456	1	1	2011-02-14	2011-02-14	1.24	0	#NULL!	1	0	0	0	0	1	0	1	0	0	0	1	1
2009-06-17	2009	1946-08-15	1	62.84	3	2	1439	1	0	#NULL!	2013-12-31	4.54	0	#NULL!	1	0	0	0	0	1	1	0	0	0	0	0	#NULL!
2012-02-16	2012	1949-04-15	1	62.84	3	3	1421	1	0	#NULL!	2013-12-31	1.87	0	#NULL!	0	0	0	0	0	1	0	1	0	0	0	0	#NULL!
2002-06-19	2002	1939-08-15	1	62.84	2	2	1489	0	1	2009-06-16	2009-06-16	6.99	0	#NULL!	0	0	0	0	0	0	0	0	0	0	0	1	7
2006-10-17	2006	1943-12-15	1	62.84	2	2	1479	0	1	2009-06-14	2009-06-14	2.66	0	#NULL!	1	0	0	0	0	0	0	0	0	0	0	0	3
2012-09-18	2012	1949-11-15	1	62.84	1	3	1452	1	0	#NULL!	2013-12-31	1.28	0	#NULL!	0	0	0	0	0	1	1	0	1	0	0	0	#NULL!
2008-05-15	2008	1945-07-15	1	62.83	4	2	1461	0	1	2009-01-07	2009-01-07	0.65	0	#NULL!	1	0	0	0	0	0	0	0	0	0	0	0	1
2007-05-14	2007	1944-07-15	1	62.83	4	2	1450	1	0	#NULL!	2010-11-01	3.47	0	#NULL!	1	0	0	0	0	0	0	0	0	0	0	0	#NULL!
2010-12-16	2010	1948-02-15	1	62.83	3	1	1479	0	1	2012-08-01	2012-08-01	1.63	0	#NULL!	1	0	0	0	0	0	1	0	0	0	0	0	2
2011-06-15	2011	1948-08-15	1	62.83	3	1	1431	1	1	2013-09-22	2013-09-22	2.27	0	#NULL!	0	0	0	0	0	0	0	0	0	0	0	0	2
2009-09-14	2009	1946-11-15	0	62.83	3	3	1479	0	0	#NULL!	2013-12-31	4.3	0	#NULL!	1	0	0	0	0	0	1	0	1	1	0	0	#NULL!
2009-03-13	2009	1946-05-15	1	62.83	3	2	1450	1	0	#NULL!	2013-12-31	4.8	0	#NULL!	0	0	0	0	0	0	0	0	0	0	0	0	#NULL!
2005-09-13	2005	1942-11-15	1	62.83	2	3	1439	1	0	#NULL!	2013-12-31	8.3	1	2005-12-09	1	0	0	0	0	1	1	1	1	0	0	0	#NULL!
2004-07-14	2004	1941-09-15	1	62.83	2	1	1460	0	0	#NULL!	2013-12-31	9.46	1	2011-01-11	0	0	0	0	0	0	1	0	0	0	0	0	#NULL!
2003-10-13	2003	1940-12-15	1	62.83	1	1	1479	0	0	#NULL!	2013-12-31	10.22	0	#NULL!	0	0	0	0	0	0	0	0	0	0	0	0	#NULL!
2010-01-12	2010	1947-03-15	1	62.83	1	2	1469	0	1	2013-11-07	2013-11-07	3.82	0	#NULL!	1	0	0	0	0	1	1	1	1	0	0	0	4
2006-03-13	2006	1943-05-15	1	62.83	1	1	1479	0	0	#NULL!	2013-12-31	7.8	0	#NULL!	1	0	0	0	0	0	1	0	1	0	0	0	#NULL!
2008-04-14	2008	1945-06-15	0	62.83	1	1	1419	1	0	#NULL!	2013-12-31	5.71	0	#NULL!	1	0	0	0	0	0	1	1	0	0	0	1	#NULL!
2003-02-14	2003	1940-04-15	1	62.83	1	3	1479	0	0	#NULL!	2013-12-31	10.88	0	#NULL!	0	0	0	0	0	0	0	0	0	0	0	0	#NULL!
2012-02-13	2012	1949-04-15	1	62.83	1	3	1419	1	0	#NULL!	2013-12-31	1.88	0	#NULL!	1	0	0	0	0	0	1	0	0	0	0	0	#NULL!
2011-12-13	2011	1949-02-15	1	62.82	4	1	1459	1	1	2012-06-09	2012-06-09	0.49	0	#NULL!	0	0	0	0	0	0	0	0	0	0	0	0	0
2006-03-09	2006	1943-05-15	0	62.82	4	2	1479	0	1	2007-06-20	2007-06-20	1.28	0	#NULL!	1	1	0	0	0	0	1	1	1	0	0	0	1
2010-05-10	2010	1947-07-15	1	62.82	3	2	1453	1	0	#NULL!	2013-12-31	3.64	0	#NULL!	1	0	0	0	0	0	0	0	0	0	0	0	#NULL!
2012-04-11	2012	1949-06-15	1	62.82	3	3	1619	0	0	#NULL!	2013-12-31	1.72	0	#NULL!	1	0	0	0	0	0	0	0	0	0	0	0	#NULL!
2010-12-10	2010	1948-02-15	1	62.82	3	3	1479	0	0	#NULL!	2013-12-31	3.06	0	#NULL!	1	0	0	0	0	0	1	0	1	0	0	0	#NULL!
2012-07-10	2012	1949-09-15	1	62.82	3	2	1469	0	1	2013-02-05	2013-02-05	0.57	0	#NULL!	1	0	0	0	0	1	1	0	0	0	0	0	1
2013-01-07	2013	1950-03-15	1	62.82	3	3	1419	1	0	#NULL!	2013-12-31	0.98	0	#NULL!	1	0	0	0	0	1	1	1	1	1	0	0	#NULL!
2003-12-12	2003	1941-02-15	0	62.82	3	2	1479	0	0	#NULL!	2013-12-31	10.05	0	#NULL!	1	0	0	0	0	0	0	0	0	0	0	0	#NULL!
2003-11-11	2003	1941-01-15	1	62.82	2	1	1619	0	1	2007-12-23	2007-12-23	4.11	0	#NULL!	0	0	0	0	0	0	0	0	0	0	0	0	4
2011-07-12	2011	1948-09-15	1	62.82	2	2	1482	0	0	#NULL!	2013-12-31	2.47	0	#NULL!	0	0	0	0	0	0	0	0	0	0	0	0	#NULL!
2012-12-12	2012	1950-02-15	1	62.82	1	3	1460	0	0	#NULL!	2013-12-31	1.05	0	#NULL!	1	0	0	0	0	0	0	0	0	0	0	0	#NULL!
2007-11-12	2007	1945-01-15	0	62.82	1	2	1479	0	0	#NULL!	2013-12-31	6.14	0	#NULL!	0	0	0	0	0	0	0	0	0	0	0	0	#NULL!
2011-03-10	2011	1948-05-15	1	62.82	1	1	1450	1	0	#NULL!	2013-12-31	2.81	0	#NULL!	1	0	0	0	0	0	1	0	0	0	0	1	#NULL!
2008-01-06	2008	1945-03-15	0	62.81	3	1	1479	0	1	2011-12-18	2011-12-18	3.95	0	#NULL!	1	0	0	0	0	1	1	1	1	0	0	0	4
2013-08-06	2013	1950-10-15	1	62.81	3	2	1419	1	0	#NULL!	2013-12-17	0.36	0	#NULL!	1	1	0	0	0	1	1	1	1	1	0	0	#NULL!
2006-09-07	2006	1943-11-15	1	62.81	3	2	1479	0	1	2010-05-08	2010-05-08	3.67	0	#NULL!	1	0	0	0	0	0	0	0	0	0	0	0	4
2011-10-07	2011	1948-12-15	0	62.81	1	1	1489	0	0	#NULL!	2013-12-31	2.23	1	2011-11-15	1	0	0	0	0	0	0	1	1	1	0	0	#NULL!
2007-04-09	2007	1944-06-15	0	62.81	1	2	1479	0	0	#NULL!	2013-12-31	6.73	0	#NULL!	1	0	0	0	0	0	0	0	0	0	0	0	#NULL!
2009-05-05	2009	1946-07-15	1	62.81	1	3	1498	0	1	2009-12-28	2009-12-28	0.65	0	#NULL!	1	1	0	0	0	0	1	0	0	0	0	0	1
2009-12-07	2009	1947-02-15	1	62.81	1	1	1455	1	0	#NULL!	2013-12-31	4.07	0	#NULL!	1	0	0	0	0	0	0	0	0	0	0	0	#NULL!
2013-01-06	2013	1950-03-15	1	62.81	1	1	1482	0	0	#NULL!	2013-12-31	0.98	0	#NULL!	1	0	0	0	0	1	1	1	1	0	0	1	#NULL!
2012-09-03	2012	1949-11-15	1	62.8	4	3	1479	0	1	2013-12-02	2013-12-02	1.25	0	#NULL!	0	0	0	0	0	0	0	0	1	0	0	0	1
2010-06-01	2010	1947-08-15	1	62.8	4	1	1460	0	1	2012-03-01	2012-03-01	1.75	0	#NULL!	0	0	0	1	0	0	1	0	0	0	0	0	2
2009-09-01	2009	1946-11-15	1	62.8	4	3	1412	1	1	2011-06-05	2011-06-05	1.76	0	#NULL!	1	0	0	0	0	0	1	0	0	0	0	0	2
2008-10-02	2008	1945-12-15	1	62.8	3	2	1431	1	1	2009-04-06	2009-04-06	0.51	0	#NULL!	1	0	0	0	0	0	0	0	1	0	0	0	1
2013-01-02	2013	1950-03-15	1	62.8	2	1	1412	1	0	#NULL!	2013-12-31	0.99	0	#NULL!	1	0	0	0	0	0	0	0	0	1	0	0	#NULL!
2010-02-02	2010	1947-04-15	1	62.8	2	2	1450	1	0	#NULL!	2013-12-31	3.91	1	2011-04-25	1	0	0	0	0	1	1	1	0	1	0	0	#NULL!
2012-10-02	2012	1949-12-15	1	62.8	2	3	1479	0	0	#NULL!	2013-12-31	1.25	0	#NULL!	1	0	0	0	0	0	0	1	1	0	0	0	#NULL!
2001-07-03	2001	1938-09-15	1	62.8	2	2	1439	1	1	2002-09-13	2002-09-13	1.2	0	#NULL!	0	0	0	0	0	0	0	0	0	0	0	0	1
2012-07-05	2012	1949-09-15	0	62.8	2	2	1479	0	0	#NULL!	2013-12-26	1.48	0	#NULL!	1	0	0	0	0	1	1	1	1	0	0	0	#NULL!
2007-11-05	2007	1945-01-15	1	62.8	2	2	1498	0	1	2008-03-16	2008-03-16	0.36	0	#NULL!	0	0	0	0	0	1	1	1	0	0	0	0	0
2007-10-02	2007	1944-12-15	1	62.8	1	1	1479	0	0	#NULL!	2013-12-31	6.25	0	#NULL!	1	0	0	0	0	0	0	1	1	0	0	0	#NULL!
2012-06-04	2012	1949-08-15	1	62.8	1	1	1459	1	0	#NULL!	2013-12-31	1.57	0	#NULL!	1	0	0	0	0	1	1	1	1	0	0	0	#NULL!
2012-12-03	2012	1950-02-15	1	62.8	1	2	1439	1	0	#NULL!	2013-12-31	1.08	0	#NULL!	1	0	0	0	0	1	1	1	0	1	0	0	#NULL!
2002-07-30	2002	1939-10-15	1	62.79	2	2	1479	0	1	2009-06-05	2009-06-05	6.85	0	#NULL!	1	0	0	0	0	0	0	0	0	0	0	0	7
2009-12-28	2009	1947-03-15	0	62.79	1	2	1479	0	1	2010-08-05	2010-08-05	0.6	0	#NULL!	1	0	0	0	0	0	1	0	0	1	0	0	1
2010-06-30	2010	1947-09-15	1	62.79	1	3	1401	1	0	#NULL!	2013-12-31	3.5	0	#NULL!	0	0	0	0	0	0	1	1	1	0	0	0	#NULL!
2008-06-30	2008	1945-09-15	1	62.79	1	1	1450	1	0	#NULL!	2013-12-31	5.5	0	#NULL!	1	0	0	0	0	0	1	0	0	0	0	0	#NULL!
2000-05-25	2000	1937-08-15	1	62.78	4	2	1619	0	1	2001-08-01	2001-08-01	1.19	0	#NULL!	0	0	0	0	0	0	0	0	0	0	0	1	1
2011-08-28	2011	1948-11-15	1	62.78	4	1	1401	1	0	#NULL!	2013-12-31	2.34	0	#NULL!	1	0	0	1	0	0	0	0	0	0	0	0	#NULL!
2005-07-26	2005	1942-10-15	1	62.78	3	1	1479	0	1	2013-11-07	2013-11-07	8.28	0	#NULL!	1	0	0	0	0	0	0	0	0	0	0	0	8
2010-07-26	2010	1947-10-15	1	62.78	3	3	1419	1	0	#NULL!	2013-12-31	3.43	0	#NULL!	1	0	0	0	0	1	1	0	0	0	0	0	#NULL!
2007-12-24	2007	1945-03-15	1	62.78	3	1	1479	0	1	2011-10-31	2011-10-31	3.85	0	#NULL!	1	0	0	0	0	0	0	0	0	0	0	0	4
2002-09-24	2002	1939-12-15	1	62.78	1	3	1461	0	0	#NULL!	2013-12-30	11.27	0	#NULL!	0	0	0	0	0	0	0	0	0	0	0	0	#NULL!
2001-11-28	2001	1939-02-15	1	62.78	1	3	1419	1	1	2002-09-20	2002-09-20	0.81	0	#NULL!	1	0	0	0	0	0	1	0	0	0	0	0	1
2010-10-28	2010	1948-01-15	1	62.78	1	1	1479	0	0	#NULL!	2013-12-31	3.18	0	#NULL!	1	0	0	0	0	0	0	0	0	0	0	0	#NULL!
2012-06-25	2012	1949-09-15	1	62.78	1	2	1419	1	1	2013-08-24	2013-08-24	1.16	0	#NULL!	0	1	0	0	0	0	1	0	1	0	0	0	1
2012-06-22	2012	1949-09-15	1	62.77	3	1	1439	1	0	#NULL!	2013-12-31	1.52	0	#NULL!	1	0	0	0	0	0	0	0	0	0	0	1	#NULL!
2012-05-21	2012	1949-08-15	1	62.77	3	3	1489	0	0	#NULL!	2013-12-31	1.61	0	#NULL!	1	0	0	0	0	1	1	1	0	0	0	0	#NULL!
2004-09-20	2004	1941-12-15	1	62.77	3	3	1489	0	1	2005-04-09	2005-04-09	0.55	0	#NULL!	1	0	0	0	0	1	1	1	0	0	0	0	1
2008-10-22	2008	1946-01-15	1	62.77	2	2	1470	0	1	2009-04-20	2009-04-20	0.49	0	#NULL!	0	0	0	0	0	1	1	1	1	0	1	0	0
2006-03-24	2006	1943-06-15	1	62.77	2	2	1419	1	1	2008-02-02	2008-02-02	1.86	0	#NULL!	1	1	0	0	0	0	1	1	0	0	0	0	2
2011-10-24	2011	1949-01-15	1	62.77	2	2	1619	0	0	#NULL!	2013-12-31	2.19	0	#NULL!	0	0	0	0	0	0	0	0	0	0	0	0	#NULL!
2007-07-23	2007	1944-10-15	0	62.77	2	1	1420	1	1	2011-11-23	2011-11-23	4.34	1	2007-08-28	1	0	0	0	0	1	0	1	0	0	0	0	4
2002-07-24	2002	1939-10-15	1	62.77	1	1	1479	0	1	2005-11-20	2005-11-20	3.33	0	#NULL!	0	0	0	0	0	0	1	0	1	0	0	0	3
2006-11-22	2006	1944-02-15	1	62.77	1	2	1414	1	0	#NULL!	2013-12-31	7.11	0	#NULL!	0	0	0	0	0	0	0	0	0	0	0	0	#NULL!
2000-04-20	2000	1937-07-15	0	62.77	1	1	1479	0	1	2010-12-24	2010-12-24	10.68	0	#NULL!	1	1	0	0	0	0	0	0	0	0	0	0	11
2011-10-20	2011	1949-01-15	1	62.76	3	2	1406	1	0	#NULL!	2013-12-31	2.2	0	#NULL!	0	0	0	0	0	0	1	0	0	0	0	0	#NULL!
2011-03-21	2011	1948-06-15	0	62.76	2	3	1412	1	0	#NULL!	2013-12-31	2.78	0	#NULL!	1	0	0	0	0	0	0	0	0	0	0	1	#NULL!
2010-10-18	2010	1948-01-15	1	62.76	1	3	1479	0	0	#NULL!	2013-12-31	3.2	0	#NULL!	1	0	0	0	0	1	1	1	0	0	0	0	#NULL!
2005-08-19	2005	1942-11-15	1	62.76	1	3	1619	0	1	2011-09-20	2011-09-20	6.09	0	#NULL!	1	1	0	0	0	0	1	1	1	0	0	0	6
2007-01-15	2007	1944-04-15	1	62.75	4	1	1440	1	1	2008-05-12	2008-05-12	1.32	0	#NULL!	0	0	0	0	0	0	1	0	0	0	0	0	1
2009-04-16	2009	1946-07-15	1	62.75	3	1	1459	1	1	2010-12-31	2010-12-31	1.71	0	#NULL!	1	0	0	0	0	1	1	0	1	0	0	0	2
2007-07-18	2007	1944-10-15	1	62.75	3	2	1450	1	0	#NULL!	2013-12-31	6.46	0	#NULL!	0	0	0	0	0	1	0	0	0	0	0	0	#NULL!
2003-09-15	2003	1940-12-15	1	62.75	2	2	1459	1	1	2004-03-15	2004-03-15	0.5	0	#NULL!	1	0	0	0	0	0	0	0	0	0	0	0	0
2009-05-14	2009	1946-08-15	1	62.75	2	2	1450	1	1	2011-02-02	2011-02-02	1.72	0	#NULL!	1	0	0	0	0	0	0	0	1	1	0	0	2
2005-03-14	2005	1942-06-15	1	62.75	2	2	1490	0	1	2012-03-17	2012-03-17	7.01	0	#NULL!	1	0	0	0	0	0	1	0	0	0	0	0	7
2009-04-15	2009	1946-07-15	1	62.75	1	2	1450	1	0	#NULL!	2013-12-31	4.71	0	#NULL!	1	0	0	0	0	1	1	0	0	0	0	1	#NULL!
2010-06-14	2010	1947-09-15	1	62.75	1	3	1479	0	1	2013-07-07	2013-07-07	3.06	0	#NULL!	1	1	0	0	0	0	1	0	0	0	0	0	3
2011-08-17	2011	1948-11-15	1	62.75	1	1	1489	0	0	#NULL!	2013-12-31	2.37	0	#NULL!	1	0	0	0	0	0	0	0	0	0	0	0	#NULL!
2005-10-17	2005	1943-01-15	0	62.75	1	2	1498	0	1	2007-04-27	2007-04-27	1.52	0	#NULL!	1	1	0	0	0	0	1	1	0	0	0	0	2
2012-05-15	2012	1949-08-15	1	62.75	1	2	1611	0	0	#NULL!	2013-12-31	1.63	0	#NULL!	1	0	0	0	0	0	0	0	0	0	0	0	#NULL!
2013-01-14	2013	1950-04-15	1	62.75	1	3	1460	0	0	#NULL!	2013-12-31	0.96	0	#NULL!	1	0	0	0	0	0	0	1	0	0	0	0	#NULL!
2009-03-16	2009	1946-06-15	1	62.75	1	2	1619	0	0	#NULL!	2013-12-31	4.79	0	#NULL!	0	0	0	0	0	0	0	0	0	0	0	0	#NULL!
2003-07-16	2003	1940-10-15	1	62.75	1	2	1489	0	1	2005-04-06	2005-04-06	1.72	0	#NULL!	1	0	0	0	0	0	0	0	0	0	0	0	2
2007-10-14	2007	1945-01-15	1	62.74	4	2	1419	1	1	2009-10-05	2009-10-05	1.98	0	#NULL!	0	0	0	0	0	0	0	0	0	0	0	0	2
2011-05-11	2011	1948-08-15	1	62.74	3	2	1459	1	1	2012-03-26	2012-03-26	0.88	0	#NULL!	1	0	0	0	0	1	0	1	0	0	0	1	1
2012-05-10	2012	1949-08-15	1	62.74	3	1	1460	0	0	#NULL!	2013-12-31	1.64	0	#NULL!	0	0	0	0	0	0	0	0	0	0	0	0	#NULL!
2000-04-10	2000	1937-07-15	1	62.74	3	2	1459	1	1	2002-03-10	2002-03-10	1.91	0	#NULL!	0	1	0	0	0	1	1	0	0	0	0	0	2
2012-09-10	2012	1949-12-15	1	62.74	3	1	1431	1	0	#NULL!	2013-12-31	1.31	1	2012-12-07	0	0	0	0	0	1	0	1	0	0	0	1	#NULL!
2006-09-12	2006	1943-12-15	1	62.74	3	2	1489	0	1	2009-05-30	2009-05-30	2.71	0	#NULL!	0	0	0	0	0	1	1	1	1	0	0	0	3
2010-10-12	2010	1948-01-15	1	62.74	3	2	1489	0	0	#NULL!	2013-12-31	3.22	0	#NULL!	0	1	0	0	0	0	1	1	1	0	0	0	#NULL!
2005-10-13	2005	1943-01-15	1	62.74	3	2	1453	1	1	2012-11-13	2012-11-13	7.09	0	#NULL!	0	0	0	0	0	0	0	0	0	0	0	0	7
2008-04-09	2008	1945-07-15	1	62.74	2	3	1459	1	1	2012-05-11	2012-05-11	4.09	0	#NULL!	1	1	0	0	0	1	1	1	0	0	0	0	4
2005-01-11	2005	1942-04-15	0	62.74	2	1	1479	0	0	#NULL!	2013-12-31	8.97	0	#NULL!	0	0	0	0	0	1	0	1	1	0	0	0	#NULL!
2001-06-11	2001	1938-09-15	1	62.74	2	2	1459	1	1	2001-09-06	2001-09-06	0.24	0	#NULL!	0	0	0	0	0	0	1	0	1	0	0	0	0
2009-09-10	2009	1946-12-15	1	62.74	2	2	1611	0	1	2010-05-28	2010-05-28	0.71	0	#NULL!	0	1	0	1	0	1	1	0	1	0	0	0	1
2010-05-13	2010	1947-08-15	1	62.74	2	2	1489	0	0	#NULL!	2013-12-31	3.64	0	#NULL!	1	0	0	0	0	0	0	0	0	0	0	0	#NULL!
2009-10-13	2009	1947-01-15	1	62.74	2	2	1479	0	0	#NULL!	2013-12-31	4.22	0	#NULL!	1	0	0	0	0	0	1	0	0	0	0	0	#NULL!
2012-09-11	2012	1949-12-15	1	62.74	1	2	1489	0	0	#NULL!	2013-12-31	1.3	0	#NULL!	1	0	0	0	0	0	0	0	0	0	0	0	#NULL!
2008-11-12	2008	1946-02-15	1	62.74	1	3	1619	0	0	#NULL!	2013-12-31	5.13	0	#NULL!	0	0	0	0	0	0	0	0	0	0	0	0	#NULL!
2006-05-10	2006	1943-08-15	1	62.74	1	1	1489	0	0	#NULL!	2013-12-25	7.63	1	2006-11-24	0	1	0	0	1	0	1	0	1	1	0	0	#NULL!
2005-03-11	2005	1942-06-15	1	62.74	1	1	1479	0	1	2010-04-26	2010-04-26	5.13	0	#NULL!	1	0	0	0	0	0	0	1	1	0	0	0	5
2009-08-11	2009	1946-11-15	0	62.74	1	2	1410	1	0	#NULL!	2013-12-31	4.39	0	#NULL!	1	0	0	0	0	0	0	0	0	0	0	0	#NULL!
2007-01-08	2007	1944-04-15	1	62.73	2	1	1452	1	1	2007-10-15	2007-10-15	0.77	0	#NULL!	0	1	0	0	0	1	0	1	1	0	0	0	1
2011-12-07	2011	1949-03-15	1	62.73	2	3	1419	1	0	#NULL!	2013-12-31	2.07	0	#NULL!	0	0	0	0	0	1	1	1	0	0	0	0	#NULL!
2005-11-08	2005	1943-02-15	1	62.73	2	2	1489	0	1	2006-05-27	2006-05-27	0.55	0	#NULL!	0	0	0	0	0	1	1	0	1	0	0	0	1
2001-07-09	2001	1938-10-15	1	62.73	2	2	1489	0	0	#NULL!	2013-12-31	12.48	0	#NULL!	0	1	0	0	0	0	1	0	0	0	0	0	#NULL!
2007-05-10	2007	1944-08-15	0	62.73	2	2	1479	0	0	#NULL!	2013-12-31	6.64	0	#NULL!	1	0	0	0	0	0	0	0	0	0	0	0	#NULL!
2011-08-08	2011	1948-11-15	1	62.73	1	2	1619	0	0	#NULL!	2013-12-31	2.4	0	#NULL!	0	0	0	0	0	0	1	0	0	0	0	1	#NULL!
2010-12-03	2010	1948-03-15	0	62.72	4	3	1430	1	1	2013-03-30	2013-03-30	2.32	0	#NULL!	0	0	0	0	0	0	1	0	0	0	0	0	2
2010-08-03	2010	1947-11-15	1	62.72	3	1	1479	0	1	2011-01-24	2011-01-24	0.48	0	#NULL!	1	1	0	0	0	1	1	0	0	0	0	0	0
2013-02-01	2013	1950-05-15	0	62.72	3	3	1450	1	0	#NULL!	2013-12-31	0.91	0	#NULL!	1	0	0	0	0	0	1	0	1	0	0	1	#NULL!
2012-03-05	2012	1949-06-15	1	62.72	3	2	1459	1	0	#NULL!	2013-12-31	1.82	0	#NULL!	0	0	0	0	0	1	1	1	0	0	0	1	#NULL!
2007-06-05	2007	1944-09-15	0	62.72	3	3	1479	0	1	2013-09-03	2013-09-03	6.25	0	#NULL!	1	0	0	0	0	0	0	0	0	0	0	0	6
2012-11-05	2012	1950-02-15	0	62.72	3	2	1409	1	0	#NULL!	2013-12-31	1.15	1	2013-03-11	0	0	0	0	0	1	1	0	1	1	0	1	#NULL!
2012-12-03	2012	1950-03-15	1	62.72	3	2	1450	1	1	2013-03-03	2013-03-03	0.25	0	#NULL!	1	0	0	1	0	0	1	0	0	0	0	0	0
2007-08-07	2007	1944-11-15	1	62.72	3	1	1479	0	1	2008-05-08	2008-05-08	0.75	0	#NULL!	1	0	0	0	0	0	1	0	0	0	0	0	1
2012-01-04	2012	1949-04-15	1	62.72	2	3	1456	1	0	#NULL!	2013-12-31	1.99	0	#NULL!	1	0	0	0	0	0	0	0	0	0	0	0	#NULL!
2012-03-05	2012	1949-06-15	1	62.72	2	2	1481	0	0	#NULL!	2013-12-31	1.82	0	#NULL!	0	1	0	1	0	0	1	0	0	0	0	0	#NULL!
2004-01-02	2004	1941-04-15	1	62.72	2	3	1460	0	1	2006-11-25	2006-11-25	2.9	0	#NULL!	0	0	0	0	0	0	0	0	0	0	0	0	3
2000-05-03	2000	1937-08-15	1	62.72	1	3	1459	1	0	#NULL!	2013-12-31	13.66	0	#NULL!	1	0	0	0	0	0	0	0	0	0	0	0	#NULL!
2009-08-04	2009	1946-11-15	1	62.72	1	2	1410	1	0	#NULL!	2013-12-31	4.41	0	#NULL!	1	0	0	0	0	0	0	0	0	0	0	0	#NULL!
2009-12-01	2009	1947-03-15	1	62.72	1	2	1459	1	0	#NULL!	2013-12-31	4.08	0	#NULL!	1	0	0	0	0	0	0	0	0	0	0	1	#NULL!
2002-12-02	2002	1940-03-15	1	62.72	1	1	1419	1	1	2003-11-11	2003-11-11	0.94	0	#NULL!	1	0	0	0	0	1	0	0	0	0	0	0	1
2008-03-04	2008	1945-06-15	1	62.72	1	2	1419	1	0	#NULL!	2013-12-31	5.83	0	#NULL!	1	0	0	0	0	0	1	1	0	0	0	0	#NULL!
2007-10-02	2007	1945-01-15	1	62.71	4	3	1412	1	0	#NULL!	2013-12-31	6.25	0	#NULL!	1	0	0	0	0	0	1	1	0	0	0	0	#NULL!
2011-12-01	2011	1949-03-15	1	62.71	4	3	1459	1	0	#NULL!	2013-12-31	2.08	0	#NULL!	1	0	0	0	0	0	0	0	0	0	0	0	#NULL!
2012-06-01	2012	1949-09-15	1	62.71	4	1	1479	0	0	#NULL!	2013-12-31	1.58	0	#NULL!	0	0	0	0	0	0	0	0	0	0	0	0	#NULL!
2003-10-02	2003	1941-01-15	1	62.71	4	2	1459	1	0	#NULL!	2013-12-31	10.25	0	#NULL!	0	0	0	0	0	0	0	0	0	0	0	0	#NULL!
2003-07-03	2003	1940-10-15	1	62.71	2	2	1452	1	1	2004-07-04	2004-07-04	1	0	#NULL!	1	0	0	0	0	0	0	0	0	0	0	0	1
2008-07-02	2008	1945-10-15	1	62.71	2	1	1459	1	0	#NULL!	2013-12-31	5.5	1	2010-02-23	1	0	0	0	0	0	1	1	1	1	0	0	#NULL!
2000-06-01	2000	1937-09-15	0	62.71	2	2	1489	0	1	2001-02-24	2001-02-24	0.73	0	#NULL!	0	0	0	0	0	1	0	0	0	0	0	0	1
2011-05-01	2011	1948-08-15	0	62.71	1	1	1450	1	0	#NULL!	2013-12-31	2.67	0	#NULL!	0	0	0	0	0	0	1	0	0	0	0	1	#NULL!
2011-12-26	2011	1949-04-15	1	62.7	4	1	1459	1	1	2013-03-31	2013-03-31	1.26	0	#NULL!	1	0	0	0	0	1	1	1	0	0	0	0	1
2007-09-27	2007	1945-01-15	1	62.7	4	2	1410	1	1	2008-05-23	2008-05-23	0.65	0	#NULL!	0	0	0	0	0	0	0	0	0	0	0	0	1
2012-10-29	2012	1950-02-15	1	62.7	3	2	1411	1	0	#NULL!	2013-12-31	1.17	0	#NULL!	0	0	0	0	0	1	1	1	1	0	0	1	#NULL!
2011-11-28	2011	1949-03-15	1	62.7	2	2	1459	1	0	#NULL!	2013-12-31	2.09	0	#NULL!	1	0	0	0	0	0	0	0	0	0	0	0	#NULL!
2011-11-28	2011	1949-03-15	1	62.7	2	3	1412	1	0	#NULL!	2013-12-31	2.09	0	#NULL!	1	0	0	0	0	0	1	1	0	0	0	0	#NULL!
2004-11-25	2004	1942-03-15	1	62.7	2	2	1489	0	1	2005-12-24	2005-12-24	1.08	0	#NULL!	1	0	0	0	0	0	1	0	0	0	0	0	1
2012-12-26	2012	1950-04-15	1	62.7	1	2	1480	0	0	#NULL!	2013-12-31	1.01	0	#NULL!	0	0	0	0	0	0	0	0	0	0	0	0	#NULL!
2009-10-29	2009	1947-02-15	1	62.7	1	1	1479	0	0	#NULL!	2013-12-31	4.17	0	#NULL!	1	0	0	0	0	0	0	0	0	0	0	0	#NULL!
2011-11-28	2011	1949-03-15	1	62.7	1	2	1489	0	0	#NULL!	2013-12-31	2.09	0	#NULL!	1	0	0	0	0	0	0	0	0	0	0	0	#NULL!
2009-03-25	2009	1946-07-15	1	62.69	3	1	1453	1	1	2013-01-14	2013-01-14	3.81	0	#NULL!	1	0	0	0	0	0	0	0	0	0	0	0	4
2002-02-21	2002	1939-06-15	1	62.69	2	2	147	0	1	2002-08-14	2002-08-14	0.48	0	#NULL!	1	0	0	0	0	0	0	0	0	0	0	0	0
2004-10-26	2004	1942-02-15	0	62.69	1	1	1459	1	0	#NULL!	2013-12-31	9.18	0	#NULL!	0	0	0	0	0	0	1	0	0	0	0	0	#NULL!
2013-07-23	2013	1950-11-15	1	62.69	1	2	1490	0	0	#NULL!	2013-12-31	0.44	0	#NULL!	1	0	0	0	0	1	1	1	0	1	0	1	#NULL!
2008-05-22	2008	1945-09-15	1	62.68	3	2	1456	1	1	2012-07-15	2012-07-15	4.15	0	#NULL!	0	0	0	0	0	0	1	0	0	1	0	0	4
2006-02-18	2006	1943-06-15	1	62.68	3	2	1479	0	1	2006-07-23	2006-07-23	0.42	0	#NULL!	1	0	0	0	0	0	0	0	0	0	0	0	0
2005-04-21	2005	1942-08-15	1	62.68	3	2	1450	1	1	2005-08-07	2005-08-07	0.3	0	#NULL!	1	0	0	0	0	0	0	0	0	0	0	0	0
2013-02-18	2013	1950-06-15	0	62.68	3	1	1472	0	0	#NULL!	2013-12-31	0.87	0	#NULL!	0	0	0	0	0	0	0	0	1	0	0	0	#NULL!
2002-11-19	2002	1940-03-15	1	62.68	2	2	1459	1	1	2006-08-09	2006-08-09	3.72	0	#NULL!	0	1	0	0	0	0	1	0	0	0	0	0	4
2012-08-21	2012	1949-12-15	1	62.68	1	1	1420	1	0	#NULL!	2013-12-31	1.36	0	#NULL!	0	0	0	0	0	0	0	0	0	0	0	0	#NULL!
2010-05-18	2010	1947-09-15	1	62.67	3	1	1489	0	1	2011-07-03	2011-07-03	1.13	0	#NULL!	0	0	0	0	0	0	1	1	0	0	0	0	1
2011-08-16	2011	1948-12-15	1	62.67	3	3	1469	0	1	2012-07-06	2012-07-06	0.89	0	#NULL!	1	0	0	0	0	1	1	1	1	0	0	0	1
2001-06-15	2001	1938-10-15	0	62.67	3	3	1479	0	1	2004-07-05	2004-07-05	3.06	0	#NULL!	1	0	0	0	0	0	0	0	0	0	0	0	3
2006-10-16	2006	1944-02-15	1	62.67	2	1	1459	1	1	2007-01-22	2007-01-22	0.27	0	#NULL!	1	0	0	0	0	0	0	0	0	0	0	0	0
2004-09-17	2004	1942-01-15	1	62.67	2	2	1459	1	1	2005-10-20	2005-10-20	1.09	0	#NULL!	0	0	0	0	0	0	0	0	0	0	0	0	1
2004-07-16	2004	1941-11-15	1	62.67	1	2	1413	1	0	#NULL!	2013-12-31	9.46	0	#NULL!	1	0	0	0	0	0	0	0	0	0	0	1	#NULL!
2012-09-18	2012	1950-01-15	1	62.67	1	1	1460	0	0	#NULL!	2013-12-31	1.28	0	#NULL!	1	0	0	0	0	0	0	0	0	0	0	0	#NULL!
2012-07-17	2012	1949-11-15	1	62.67	1	2	1453	1	0	#NULL!	2013-12-31	1.46	0	#NULL!	0	0	0	0	0	1	1	1	1	0	0	0	#NULL!
2012-12-11	2012	1950-04-15	1	62.66	3	2	1459	1	1	2013-11-24	2013-11-24	0.95	0	#NULL!	1	0	0	0	0	1	1	1	0	0	0	0	1
2013-03-11	2013	1950-07-15	1	62.66	3	2	1461	0	0	#NULL!	2013-12-31	0.81	0	#NULL!	1	0	0	0	0	0	1	1	1	0	0	0	#NULL!
2009-05-12	2009	1946-09-15	1	62.66	2	1	1450	1	1	2013-10-01	2013-10-01	4.39	0	#NULL!	1	0	0	0	0	0	0	0	0	0	0	1	4
2013-11-11	2013	1951-03-15	1	62.66	2	1	1412	1	0	#NULL!	2013-12-31	0.14	0	#NULL!	0	0	0	0	0	0	0	0	0	0	0	0	#NULL!
2004-07-13	2004	1941-11-15	1	62.66	1	3	1453	1	0	#NULL!	2009-12-28	5.46	0	#NULL!	0	1	0	0	0	0	0	0	0	0	0	0	#NULL!
2004-10-15	2004	1942-02-15	1	62.66	1	3	1479	0	1	2010-08-04	2010-08-04	5.8	0	#NULL!	1	0	0	0	0	0	0	0	0	0	0	0	6
2003-02-11	2003	1940-06-15	1	62.66	1	3	1419	1	1	2006-08-16	2006-08-16	3.51	0	#NULL!	1	0	0	0	0	1	1	0	0	0	0	0	4
2007-04-11	2007	1944-08-15	1	62.65	3	1	1419	1	1	2008-01-16	2008-01-16	0.77	0	#NULL!	1	0	0	0	0	0	0	0	0	1	0	0	1
2007-04-09	2007	1944-08-15	0	62.65	2	1	1479	0	0	#NULL!	2013-12-31	6.73	0	#NULL!	1	0	0	0	0	0	1	0	0	0	0	0	#NULL!
2010-01-06	2010	1947-05-15	1	62.65	1	3	1619	0	1	2012-06-13	2012-06-13	2.43	0	#NULL!	0	0	0	0	0	1	1	0	0	0	0	0	2
2012-05-10	2012	1949-09-15	1	62.65	1	1	1619	0	0	#NULL!	2013-12-31	1.64	0	#NULL!	1	0	0	0	0	1	1	1	1	0	0	0	#NULL!
2012-03-06	2012	1949-07-15	1	62.64	4	2	1419	1	0	#NULL!	2013-12-31	1.82	0	#NULL!	1	0	0	0	0	1	1	1	0	0	0	0	#NULL!
2011-07-07	2011	1948-11-15	0	62.64	3	2	1459	1	1	2012-02-21	2012-02-21	0.63	0	#NULL!	1	0	0	0	0	0	1	0	1	0	0	0	1
2000-03-06	2000	1937-07-15	1	62.64	3	2	1489	0	1	2005-11-21	2005-11-21	5.71	0	#NULL!	1	0	0	0	0	0	0	0	1	0	0	0	6
2011-04-07	2011	1948-08-15	1	62.64	3	3	1479	0	0	#NULL!	2013-12-31	2.74	0	#NULL!	1	1	0	1	0	1	0	0	0	0	0	0	#NULL!
2003-07-09	2003	1940-11-15	1	62.64	2	1	161	0	1	2004-09-02	2004-09-02	1.15	0	#NULL!	0	0	0	0	0	0	1	0	0	0	0	0	1
2013-01-04	2013	1950-05-15	1	62.64	2	2	1419	1	0	#NULL!	2013-12-31	0.99	0	#NULL!	1	1	0	0	0	0	1	0	0	0	0	1	#NULL!
2001-06-05	2001	1938-10-15	1	62.64	2	1	1450	1	0	#NULL!	2013-12-31	12.57	1	2001-10-05	0	0	0	0	0	0	1	0	0	0	0	0	#NULL!
2001-01-02	2001	1938-05-15	0	62.64	2	2	1479	0	1	2008-02-03	2008-02-03	7.09	0	#NULL!	1	0	0	0	0	0	0	0	0	0	0	0	7
2010-07-06	2010	1947-11-15	1	62.64	2	2	1460	0	1	2011-03-27	2011-03-27	0.72	0	#NULL!	1	1	0	0	0	1	0	0	0	0	0	0	1
2012-04-05	2012	1949-08-15	1	62.64	2	3	1419	1	0	#NULL!	2013-12-31	1.74	0	#NULL!	0	0	0	0	0	1	1	0	1	0	0	0	#NULL!
2012-12-06	2012	1950-04-15	1	62.64	2	2	1400	1	0	#NULL!	2013-12-31	1.07	0	#NULL!	0	0	0	0	0	0	1	0	0	0	0	1	#NULL!
2011-04-06	2011	1948-08-15	1	62.64	2	2	1470	0	1	2013-06-05	2013-06-05	2.17	0	#NULL!	1	0	0	0	0	0	1	0	1	0	0	0	2
2011-12-05	2011	1949-04-15	1	62.64	1	1	1452	1	1	2013-06-05	2013-06-05	1.5	0	#NULL!	0	1	0	0	1	1	1	1	0	0	0	0	2
2010-12-05	2010	1948-04-15	1	62.64	1	3	1479	0	1	2011-01-28	2011-01-28	0.15	0	#NULL!	1	0	0	0	0	0	1	1	1	0	0	0	0
2011-12-07	2011	1949-04-15	1	62.64	1	3	1460	0	0	#NULL!	2013-12-31	2.07	0	#NULL!	0	0	0	0	0	1	1	1	1	0	0	0	#NULL!
2002-04-04	2002	1939-08-15	1	62.64	1	1	1479	0	1	2011-04-10	2011-04-10	9.02	0	#NULL!	1	0	0	0	0	0	0	0	0	0	0	0	9
2009-04-07	2009	1946-08-15	1	62.64	1	3	1480	0	0	#NULL!	2013-12-31	4.73	0	#NULL!	1	0	0	0	0	0	1	0	0	0	0	1	#NULL!
2011-09-08	2011	1949-01-15	1	62.64	1	2	1459	1	0	#NULL!	2013-12-31	2.31	0	#NULL!	0	0	0	0	0	0	0	0	0	0	0	0	#NULL!
2013-01-02	2013	1950-05-15	1	62.64	1	1	1479	0	0	#NULL!	2013-12-31	0.99	0	#NULL!	1	0	0	0	0	0	0	0	0	0	0	0	#NULL!
2004-03-05	2004	1941-07-15	1	62.64	1	1	1479	0	1	2004-06-13	2004-06-13	0.27	0	#NULL!	0	0	0	0	0	0	0	0	0	0	0	0	0
2010-03-31	2010	1947-08-15	1	62.63	4	1	1460	0	0	#NULL!	2013-12-31	3.75	0	#NULL!	1	0	0	0	0	0	0	0	0	0	0	1	#NULL!
2010-03-02	2010	1947-07-15	1	62.63	3	2	1479	0	0	#NULL!	2013-12-31	3.83	0	#NULL!	1	0	0	0	0	1	1	1	0	0	0	0	#NULL!
2011-07-04	2011	1948-11-15	1	62.63	3	1	1449	1	0	#NULL!	2013-12-31	2.49	0	#NULL!	1	0	0	1	0	0	1	0	0	0	0	0	#NULL!
2011-09-02	2011	1949-01-15	1	62.63	3	1	1479	0	1	2012-07-29	2012-07-29	0.91	0	#NULL!	1	0	0	0	0	1	1	0	0	0	0	0	1
2009-10-02	2009	1947-02-15	1	62.63	3	2	1489	0	1	2011-01-11	2011-01-11	1.28	0	#NULL!	0	0	0	0	0	0	0	0	0	0	0	0	1
2003-08-04	2003	1940-12-15	1	62.63	3	2	1453	1	0	#NULL!	2013-12-31	10.41	0	#NULL!	0	0	0	0	0	1	1	0	0	0	0	0	#NULL!
2002-05-02	2002	1939-09-15	1	62.63	2	1	1450	1	1	2002-10-08	2002-10-08	0.44	0	#NULL!	0	1	0	0	0	0	1	0	1	0	0	0	0
2011-10-04	2011	1949-02-15	1	62.63	2	3	1479	0	0	#NULL!	2013-12-31	2.24	0	#NULL!	1	0	0	0	0	0	0	0	0	0	0	0	#NULL!
2002-12-30	2002	1940-05-15	1	62.63	1	1	1489	0	1	2004-03-09	2004-03-09	1.19	0	#NULL!	1	0	0	0	0	0	0	0	0	0	0	0	1
2011-03-01	2011	1948-07-15	1	62.63	1	1	1479	0	0	#NULL!	2013-12-31	2.84	0	#NULL!	1	0	0	0	0	0	1	1	0	0	0	0	#NULL!
2011-10-27	2011	1949-03-15	1	62.62	3	2	1431	1	0	#NULL!	2013-12-24	2.16	1	2011-12-22	1	0	0	0	0	1	1	1	1	1	0	1	#NULL!
2011-03-29	2011	1948-08-15	1	62.62	3	1	1479	0	0	#NULL!	2013-12-31	2.76	0	#NULL!	0	0	0	0	0	0	1	0	0	0	0	0	#NULL!
2013-08-28	2013	1951-01-15	1	62.62	2	3	1419	1	0	#NULL!	2013-12-31	0.34	0	#NULL!	0	0	0	0	0	0	0	0	0	0	0	0	#NULL!
2011-07-31	2011	1948-12-15	1	62.62	2	1	1619	0	1	2012-02-04	2012-02-04	0.51	0	#NULL!	0	0	0	0	0	1	0	0	0	0	0	0	1
2011-03-30	2011	1948-08-15	1	62.62	1	3	1453	1	1	2011-08-31	2011-08-31	0.42	0	#NULL!	0	1	0	0	0	0	1	0	1	0	0	0	0
2012-07-29	2012	1949-12-15	1	62.62	1	1	1431	1	1	2013-01-22	2013-01-22	0.48	0	#NULL!	0	0	0	0	0	0	1	0	1	0	0	0	0
2011-12-28	2011	1949-05-15	1	62.62	1	3	1611	0	1	2013-06-09	2013-06-09	1.45	0	#NULL!	1	0	0	0	0	1	1	1	0	0	0	0	1
2006-01-26	2006	1943-06-15	1	62.62	1	1	1498	0	1	2011-05-22	2011-05-22	5.32	0	#NULL!	1	0	0	0	0	0	0	0	0	0	0	0	5
2010-06-29	2010	1947-11-15	1	62.62	1	1	1481	0	1	2011-10-08	2011-10-08	1.28	0	#NULL!	1	0	0	0	0	1	1	0	0	0	0	0	1
2012-12-24	2012	1950-05-15	0	62.61	2	1	1412	1	0	#NULL!	2013-12-31	1.02	0	#NULL!	1	0	0	0	0	0	0	0	0	0	0	1	#NULL!
2001-08-27	2001	1939-01-15	1	62.61	1	2	1479	0	0	#NULL!	2013-12-31	12.34	0	#NULL!	1	1	0	0	0	0	0	0	0	0	0	0	#NULL!
2011-10-24	2011	1949-03-15	1	62.61	1	1	1479	0	0	#NULL!	2013-12-31	2.19	0	#NULL!	1	0	0	0	0	0	0	0	0	0	0	0	#NULL!
2012-09-24	2012	1950-02-15	1	62.61	1	2	1431	1	0	#NULL!	2013-12-31	1.27	0	#NULL!	1	0	0	0	0	1	1	0	1	0	0	0	#NULL!
2007-06-22	2007	1944-11-15	1	62.6	3	2	1419	1	1	2012-09-12	2012-09-12	5.23	0	#NULL!	0	0	0	0	0	0	0	0	0	0	0	1	5
2002-05-22	2002	1939-10-15	1	62.6	3	1	1479	0	1	2007-02-27	2007-02-27	4.77	0	#NULL!	0	0	0	0	0	1	0	0	1	0	0	0	5
2009-03-23	2009	1946-08-15	1	62.6	3	2	1489	0	0	#NULL!	2013-12-31	4.77	0	#NULL!	0	0	0	0	0	0	1	0	0	0	0	0	#NULL!
2010-06-22	2010	1947-11-15	1	62.6	3	2	1611	0	1	2012-02-05	2012-02-05	1.62	0	#NULL!	0	0	0	0	0	0	1	0	0	0	0	0	2
2010-06-21	2010	1947-11-15	1	62.6	3	2	1619	0	1	2011-05-30	2011-05-30	0.94	0	#NULL!	1	0	0	0	0	1	1	1	0	0	0	0	1
2007-08-24	2007	1945-01-15	1	62.6	2	2	1499	0	1	2008-06-03	2008-06-03	0.78	0	#NULL!	1	0	0	0	0	0	0	0	1	0	0	0	1
2008-09-23	2008	1946-02-15	1	62.6	2	3	1458	1	1	2009-10-26	2009-10-26	1.09	0	#NULL!	1	0	0	0	0	0	0	0	1	0	0	0	1
2004-12-20	2004	1942-05-15	1	62.6	2	2	1498	0	1	2009-09-11	2009-09-11	4.73	0	#NULL!	1	0	0	0	0	0	0	0	0	0	0	0	5
2013-03-21	2013	1950-08-15	1	62.6	1	1	1455	1	1	2013-06-05	2013-06-05	0.21	0	#NULL!	1	0	0	0	0	0	1	1	0	0	0	0	0
2010-05-21	2010	1947-10-15	1	62.6	1	3	1456	1	0	#NULL!	2013-12-31	3.61	0	#NULL!	1	0	0	0	0	0	0	0	0	0	0	0	#NULL!
2007-12-21	2007	1945-05-15	1	62.6	1	2	1459	1	0	#NULL!	2013-12-31	6.03	0	#NULL!	1	0	0	0	0	0	0	0	0	0	0	0	#NULL!
2002-12-20	2002	1940-05-15	1	62.6	1	2	1470	0	1	2012-04-23	2012-04-23	9.34	0	#NULL!	0	0	0	0	0	0	1	1	1	0	0	0	9
2005-06-20	2005	1942-11-15	1	62.6	1	3	1619	0	0	#NULL!	2013-12-31	8.53	0	#NULL!	1	0	0	0	0	0	0	0	0	0	0	0	#NULL!
2009-01-19	2009	1946-06-15	1	62.6	1	3	1420	1	0	#NULL!	2013-12-31	4.95	0	#NULL!	1	0	0	0	0	1	0	0	0	0	0	0	#NULL!
2009-05-18	2009	1946-10-15	1	62.59	3	1	1479	0	0	#NULL!	2013-12-26	4.61	0	#NULL!	1	0	0	0	0	0	0	0	0	0	0	0	#NULL!
2003-06-19	2003	1940-11-15	1	62.59	3	2	1431	1	1	2004-06-20	2004-06-20	1	0	#NULL!	0	0	0	0	0	0	0	0	0	0	0	1	1
2010-11-17	2010	1948-04-15	1	62.59	3	1	1450	1	1	2012-05-19	2012-05-19	1.5	0	#NULL!	1	0	0	0	0	0	0	0	0	0	0	1	2
2004-04-19	2004	1941-09-15	1	62.59	2	3	1460	0	1	2007-08-18	2007-08-18	3.33	0	#NULL!	0	0	0	0	0	0	0	0	0	0	0	0	3
2007-12-18	2007	1945-05-15	1	62.59	2	2	1459	1	1	2008-02-23	2008-02-23	0.18	0	#NULL!	1	0	0	0	0	1	0	0	0	0	0	0	0
2006-10-16	2006	1944-03-15	0	62.59	1	1	1412	1	0	#NULL!	2013-12-31	7.21	0	#NULL!	0	1	0	0	0	1	1	0	0	0	0	0	#NULL!
2011-08-17	2011	1949-01-15	0	62.58	3	1	1460	0	0	#NULL!	2013-12-31	2.37	0	#NULL!	1	0	0	0	0	0	1	1	0	0	0	0	#NULL!
2011-11-14	2011	1949-04-15	1	62.58	3	2	1489	0	1	2013-03-19	2013-03-19	1.34	0	#NULL!	1	0	0	0	0	1	0	0	0	0	0	0	1
2008-02-13	2008	1945-07-15	0	62.58	3	1	1479	0	1	2008-10-04	2008-10-04	0.64	0	#NULL!	0	0	0	0	0	0	1	1	1	0	0	0	1
2010-12-14	2010	1948-05-15	1	62.58	3	2	1459	1	0	#NULL!	2013-12-31	3.05	0	#NULL!	0	0	0	0	0	0	1	0	1	0	0	0	#NULL!
2002-01-14	2002	1939-06-15	1	62.58	2	3	1460	0	0	#NULL!	2008-02-04	6.06	0	#NULL!	0	0	0	0	0	0	1	1	0	0	0	0	#NULL!
2004-12-14	2004	1942-05-15	1	62.58	2	2	1460	0	1	2007-01-29	2007-01-29	2.12	0	#NULL!	1	0	0	0	0	0	0	0	0	1	0	0	2
2003-04-14	2003	1940-09-15	1	62.58	2	3	1450	1	1	2003-07-06	2003-07-06	0.23	0	#NULL!	0	0	0	0	0	1	1	0	0	0	0	0	0
[truncated: 38,986 more rows]
